# Supplementary material for: Visible light-mediated stereoselective haloalkylation of bicyclic alkenes
Source: Royal Society of Chemistry journal article supplement (doi:10.1039/d5gc05217c), 2026-01-01

## Supporting Information

### Visible Light-Mediated Stereoselective Haloalkylation of Bicyclic Alkenes

Yan Tang,<sup>a</sup> Devendar Ponnamp, <sup>a</sup> Zhifeng Ma,<sup>a</sup> Xiong Tao,<sup>a</sup> Long Sun,<sup>a</sup> Hekun Yang,<sup>a</sup> Jingchao Chen<sup>\*a,b</sup> and Baomin Fan<sup>\*a,b</sup>

---

<sup>a</sup> Yunnan Key Laboratory of Chiral Functional Substance Research and Application, Yunnan Minzu University, Yuehua Street, Kunming 650500, China. E-mail: chenjingchao84@163.com, FanBM@ynni.edu.cn

<sup>b</sup> Key Laboratory of Chemistry in Ethnic Medicinal Resources, Yunnan Minzu University, Yuehua Street, Kunming 650500, China

#### Table of Contents

|                                                                           |    |
|---------------------------------------------------------------------------|----|
| 1. General information.....                                               | 1  |
| 2. General experimental methods.....                                      | 1  |
| 3. Investigation of the key reaction parameters .....                     | 1  |
| 4. Gram-scale reaction.....                                               | 8  |
| 5. Mechanistic studies .....                                              | 8  |
| 6. Crystallographic Data .....                                            | 18 |
| 7. DFT calculation .....                                                  | 28 |
| 8. Characterization data of products .....                                | 32 |
| 9. Reference .....                                                        | 43 |
| 10. NMR Spectra of Products.....                                          | 45 |
| 11. NMR evaluation of <i>cis-trans</i> diastereomer of crude mixture..... | 88 |

## 1. General information

Oxabenzonorbornadienes were synthesized according to the steps in the literature. A series of oxabenzonorbornadienes containing different substituents were synthesized according to literature method<sup>[1]</sup>. Ethyl iodacetate and trichloromethane iodide were synthesized according to the steps in the literature<sup>[2]</sup>. Other commercially available reagents and solvents were purchased and used without further purification. All catalytic experiments were performed under an atmosphere of argon by using Glove Box. <sup>1</sup>H NMR (400 MHz/600 MHz) and <sup>13</sup>C NMR (101 MHz/151MHz) spectra were recorded on a Bruker NMR spectrometer in CDCl<sub>3</sub>/CD<sub>3</sub>OD using TMS as an internal reference with chemical shift values reported in ppm. Abbreviations used in the NMR follow-up experiments: s, singlet; d, doublet; t, triplet; q, quartet; m, multiplet. High-resolution mass spectra (HRMS) were obtained by fast atom bombardment (FAB) using a double focusing magnetic sector mass spectrometer and electrospray ionization electron impact (ESI) ionization technique. The light source was 30 W blue LED (450 nm, 1 W\*30, 30-50 cd/m<sup>2</sup>, made in Everlight Electronics Ltd., China); borosilicate glass Schlenk tube (20 mL) was used as the irradiation vessel; the distance from the light source to the irradiation vessel 3 cm and no filter was used.

## 2. General experimental methods

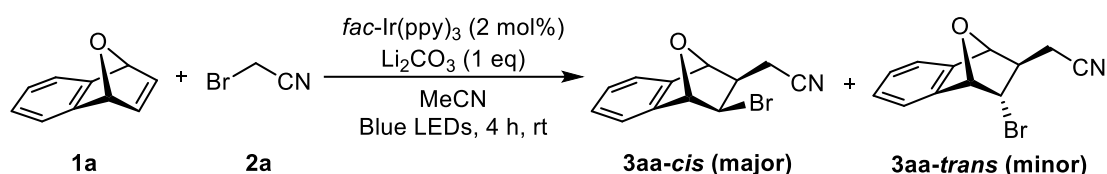

In N<sub>2</sub> atmosphere, a magnetic stirring rod was installed on the oven-dried Schlenk tube. *fac*-Ir(ppy)<sub>3</sub> (2 mol%, 0.02 equiv), Li<sub>2</sub>CO<sub>3</sub> (0.2 mmol, 1 equiv), oxabenzonorbornadiene (0.2 mmol, 1.0 equiv), acetonitrile bromide (0.4 mmol, 2 equiv) and MeCN (2 mL) were added. The mixture is then irradiated for 4 h at room temperature with a 30 W blue LEDs (450 nm). The reaction mixture was concentrated by vacuum, combined yields and cis/trans-ratios were determined by <sup>1</sup>H NMR analysis of the crude reaction mixture using p-nitrotoluene as internal standard.

## 3. Investigation of the key reaction parameters

### 3.1. The bromoalkylation reaction of oxabenzonorbornadienes

#### 3.1.1. Controlled experiment: <sup>[a]</sup>

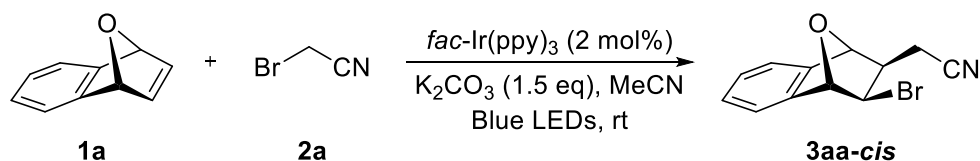

| Entry | photocatalyst                    | Base                           | Solvent | Light source | Time (h) | Yield (%) <sup>[b]</sup> | dr <sup>[b]</sup> |
|-------|----------------------------------|--------------------------------|---------|--------------|----------|--------------------------|-------------------|
| 1     | <i>fac</i> -Ir(ppy) <sub>3</sub> | K <sub>2</sub> CO <sub>3</sub> | MeCN    | blue         | 9        | 71                       | 73:27             |
| 2     | /                                | K <sub>2</sub> CO <sub>3</sub> | MeCN    | blue         | 9        | NR <sup>[c]</sup>        | --                |
| 3     | <i>fac</i> -Ir(ppy) <sub>3</sub> | /                              | MeCN    | blue         | 10       | 56                       | 55:45             |
| 4     | <i>fac</i> -Ir(ppy) <sub>3</sub> | K <sub>2</sub> CO <sub>3</sub> | MeCN    | /            | 9        | NR <sup>[c]</sup>        | --                |

<sup>[a]</sup>General conditions: **1a** (0.2 mmol), **2a** (0.8 mmol), photocatalyst (2 mol%) and K<sub>2</sub>CO<sub>3</sub> (1.5 equiv) in MeCN (2 mL) was irradiated with 30 W blue LEDs at room temperature under argon. <sup>[b]</sup>Combined yields and *cis/trans*-ratios were determined by <sup>1</sup>H NMR analysis of the crude reaction mixture using P-nitrotoluene as internal standard. <sup>[c]</sup>NR= no reaction.

### 3.1.2. Screening for photosensitizers and amounts: <sup>[a]</sup>

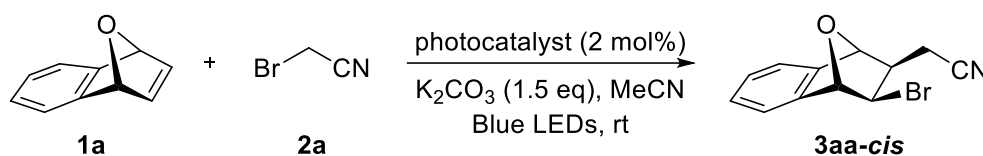

| Entry | photocatalyst                                                    | Base                           | Solvent | Time (h) | Yield (%) <sup>[b]</sup> | dr <sup>[b]</sup> |
|-------|------------------------------------------------------------------|--------------------------------|---------|----------|--------------------------|-------------------|
| 1     | <i>fac</i> -Ir(ppy) <sub>3</sub>                                 | K <sub>2</sub> CO <sub>3</sub> | MeCN    | 9        | 71                       | 73:27             |
| 2     | Ir[dF(CF <sub>3</sub> )ppy] <sub>2</sub> (dtbbpy)PF <sub>6</sub> | K <sub>2</sub> CO <sub>3</sub> | MeCN    | 10       | 42                       | 52:48             |
| 3     | 4CzIPN                                                           | K <sub>2</sub> CO <sub>3</sub> | MeCN    | 14       | 40                       | 56:44             |
| 4     | EosinY                                                           | K <sub>2</sub> CO <sub>3</sub> | MeCN    | 22       | ND <sup>[c]</sup>        | --                |
| 5     | Ru(bpy) <sub>3</sub> ·6H <sub>2</sub> O                          | K <sub>2</sub> CO <sub>3</sub> | MeCN    | 22       | Trace <sup>[d]</sup>     | --                |
| 6     | Mes-ACr <sup>+</sup>                                             | K <sub>2</sub> CO <sub>3</sub> | MeCN    | 22       | Trace <sup>[d]</sup>     | --                |

<sup>[a]</sup>General conditions: **1a** (0.2 mmol), **2a** (0.8 mmol), photocatalyst (2 mol%) and K<sub>2</sub>CO<sub>3</sub> (1.5 equiv) in MeCN (2 mL) was irradiated with 30 W blue LEDs at room temperature under argon. <sup>[b]</sup>Combined yields and *cis/trans*-ratios were determined by <sup>1</sup>H NMR analysis of the crude reaction mixture using P-nitrotoluene as internal standard. <sup>[c]</sup>ND= not detected. <sup>[d]</sup>trace= Raw material is declining but no product is being monitored.

| Entry | <i>fac</i> -Ir(ppy) <sub>3</sub> | Base                           | Solvent | Time (h) | Yield (%) <sup>[b]</sup> | dr <sup>[b]</sup> |
|-------|----------------------------------|--------------------------------|---------|----------|--------------------------|-------------------|
| 1     | 1%                               | K <sub>2</sub> CO <sub>3</sub> | MeCN    | 12       | 63                       | 63:37             |
| 2     | 2%                               | K <sub>2</sub> CO <sub>3</sub> | MeCN    | 9        | 71                       | 73:27             |
| 3     | 3%                               | K <sub>2</sub> CO <sub>3</sub> | MeCN    | 8        | 71                       | 70:30             |
| 4     | 4%                               | K <sub>2</sub> CO <sub>3</sub> | MeCN    | 8        | 72                       | 69:31             |
| 5     | 5%                               | K <sub>2</sub> CO <sub>3</sub> | MeCN    | 6        | 72                       | 69:31             |

### 3.1.3. Screening for base and amounts: <sup>[a]</sup>

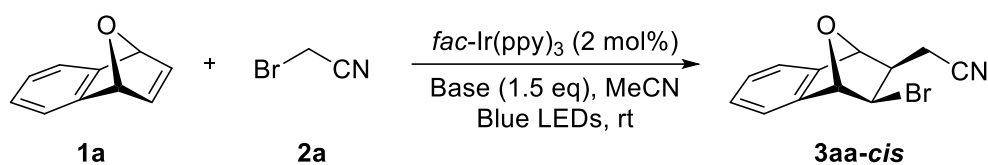

| Entry | photocatalyst                    | Base                            | Solvent | Time (h) | Yield (%) <sup>[b]</sup> | dr <sup>[b]</sup> |
|-------|----------------------------------|---------------------------------|---------|----------|--------------------------|-------------------|
| 1     | <i>fac</i> -Ir(ppy) <sub>3</sub> | DBU                             | MeCN    | 9        | Trace <sup>[c]</sup>     | --                |
| 2     | <i>fac</i> -Ir(ppy) <sub>3</sub> | 2,6-Lutidine                    | MeCN    | 9        | 46                       | 53:47             |
| 3     | <i>fac</i> -Ir(ppy) <sub>3</sub> | Et <sub>3</sub> N               | MeCN    | 9        | Trace <sup>[c]</sup>     | --                |
| 4     | <i>fac</i> -Ir(ppy) <sub>3</sub> | Li <sub>2</sub> CO <sub>3</sub> | MeCN    | 4        | 86                       | 85:15             |
| 5     | <i>fac</i> -Ir(ppy) <sub>3</sub> | Na <sub>2</sub> CO <sub>3</sub> | MeCN    | 9        | 72                       | 72:28             |
| 6     | <i>fac</i> -Ir(ppy) <sub>3</sub> | NaHCO <sub>3</sub>              | MeCN    | 9        | 77                       | 77:23             |
| 7     | <i>fac</i> -Ir(ppy) <sub>3</sub> | Cs <sub>2</sub> CO <sub>3</sub> | MeCN    | 9        | 39                       | 52:48             |
| 8     | <i>fac</i> -Ir(ppy) <sub>3</sub> | NaOH                            | MeCN    | 9        | 48                       | 50:50             |
| 9     | <i>fac</i> -Ir(ppy) <sub>3</sub> | K <sub>3</sub> PO <sub>4</sub>  | MeCN    | 9        | 64                       | 66:34             |
| 10    | <i>fac</i> -Ir(ppy) <sub>3</sub> | K <sub>2</sub> HPO <sub>4</sub> | MeCN    | 9        | 82                       | 83:17             |
| 11    | <i>fac</i> -Ir(ppy) <sub>3</sub> | KH <sub>2</sub> PO <sub>4</sub> | MeCN    | 9        | 75                       | 76:24             |

<sup>[a]</sup>General conditions: **1a** (0.2 mmol), **2a** (0.8 mmol), *fac*-Ir(ppy)<sub>3</sub> (2 mol%) and base (1.5 equiv) in MeCN (2 mL) was irradiated with 30 W blue LEDs at room temperature under argon. <sup>[b]</sup>Combined yields and *cis/trans*-ratios were determined by <sup>1</sup>H NMR analysis of the crude reaction mixture using P-nitrotoluene as internal standard. <sup>[c]</sup>trace= Raw material is declining but no product is being monitored.

| Entry | photocatalyst                    | Li <sub>2</sub> CO <sub>3</sub><br>(equiv) | solvent | Time (h) | Yield (%) <sup>[b]</sup> | dr <sup>[b]</sup> |
|-------|----------------------------------|--------------------------------------------|---------|----------|--------------------------|-------------------|
| 1     | <i>fac</i> -Ir(ppy) <sub>3</sub> | 1                                          | MeCN    | 4        | 86                       | 85:15             |
| 2     | <i>fac</i> -Ir(ppy) <sub>3</sub> | 1.5                                        | MeCN    | 4        | 86                       | 85:15             |
| 3     | <i>fac</i> -Ir(ppy) <sub>3</sub> | 2                                          | MeCN    | 4        | 85                       | 85:15             |
| 4     | <i>fac</i> -Ir(ppy) <sub>3</sub> | 3                                          | MeCN    | 4        | 86                       | 85:15             |



### 3.1.4. Solvent screening: <sup>[a]</sup>

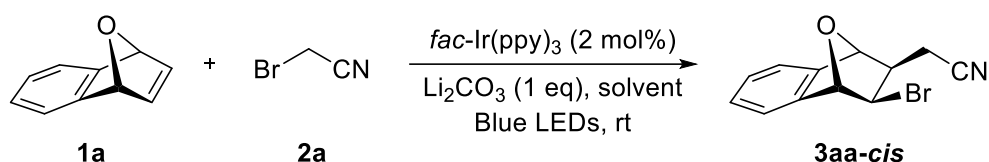

| Entry | photocatalyst                    | Base                            | Solvent     | Time (h) | Yield (%) <sup>[b]</sup> | dr <sup>[b]</sup> |
|-------|----------------------------------|---------------------------------|-------------|----------|--------------------------|-------------------|
| 1     | <i>fac</i> -Ir(ppy) <sub>3</sub> | Li <sub>2</sub> CO <sub>3</sub> | MeCN        | 4        | 86                       | 85:15             |
| 2     | <i>fac</i> -Ir(ppy) <sub>3</sub> | Li <sub>2</sub> CO <sub>3</sub> | DCM         | 9        | 62                       | 64:36             |
| 3     | <i>fac</i> -Ir(ppy) <sub>3</sub> | Li <sub>2</sub> CO <sub>3</sub> | Acetone     | 9        | Trace <sup>[c]</sup>     | --                |
| 4     | <i>fac</i> -Ir(ppy) <sub>3</sub> | Li <sub>2</sub> CO <sub>3</sub> | Toluene     | 9        | 40                       | 50:50             |
| 5     | <i>fac</i> -Ir(ppy) <sub>3</sub> | Li <sub>2</sub> CO <sub>3</sub> | THF         | 9        | 42                       | 51:49             |
| 6     | <i>fac</i> -Ir(ppy) <sub>3</sub> | Li <sub>2</sub> CO <sub>3</sub> | 1,4-Dioxane | 9        | 48                       | 51:49             |
| 7     | <i>fac</i> -Ir(ppy) <sub>3</sub> | Li <sub>2</sub> CO <sub>3</sub> | DMF         | 9        | 47                       | 52:48             |
| 8     | <i>fac</i> -Ir(ppy) <sub>3</sub> | Li <sub>2</sub> CO <sub>3</sub> | MeOH        | 9        | 35                       | 55:45             |
| 9     | <i>fac</i> -Ir(ppy) <sub>3</sub> | Li <sub>2</sub> CO <sub>3</sub> | EA          | 16       | 52                       | 53:47             |
| 10    | <i>fac</i> -Ir(ppy) <sub>3</sub> | Li <sub>2</sub> CO <sub>3</sub> | DCE         | 9        | 65                       | 70:30             |

<sup>[a]</sup>General conditions: **1a** (0.2 mmol), **2a** (0.8 mmol), *fac*-Ir(ppy)<sub>3</sub> (2 mol%) and Li<sub>2</sub>CO<sub>3</sub> (1 equiv) in solvent (2 mL) was irradiated with 30 W blue LEDs at room temperature under argon. <sup>[b]</sup>Combined yields and *cis/trans*-ratios were determined by <sup>1</sup>H NMR analysis of the crude reaction mixture using P-nitrotoluene as internal standard. <sup>[c]</sup>trace= Raw material is declining but no product is being monitored.

### 3.1.5. Light source screening: <sup>[a]</sup>

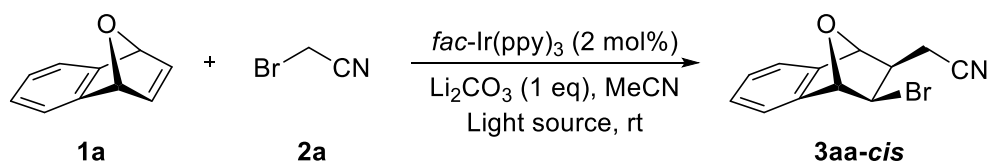

| Entry | photocatalyst                    | Base                            | Solvent | Light source | Time (h) | Yield (%) <sup>[b]</sup> | dr <sup>[b]</sup> |
|-------|----------------------------------|---------------------------------|---------|--------------|----------|--------------------------|-------------------|
| 1     | <i>fac</i> -Ir(ppy) <sub>3</sub> | Li <sub>2</sub> CO <sub>3</sub> | MeCN    | 450 nm       | 4        | 86                       | 85:15             |
| 2     | <i>fac</i> -Ir(ppy) <sub>3</sub> | Li <sub>2</sub> CO <sub>3</sub> | MeCN    | 420 nm       | 4        | 82                       | 81:19             |
| 3     | <i>fac</i> -Ir(ppy) <sub>3</sub> | Li <sub>2</sub> CO <sub>3</sub> | MeCN    | 395 nm       | 8        | 84                       | 83:17             |
| 5     | <i>fac</i> -Ir(ppy) <sub>3</sub> | Li <sub>2</sub> CO <sub>3</sub> | MeCN    | 530 nm       | 7        | 71                       | 72:28             |

<sup>[a]</sup>General conditions: **1a** (0.2 mmol), **2a** (0.8 mmol), *fac*-Ir(ppy)<sub>3</sub> (2 mol%) and Li<sub>2</sub>CO<sub>3</sub> (1 equiv) in MeCN (2 mL) was irradiated with 30 W LEDs at room temperature under

argon. <sup>[b]</sup>Combined yields and *cis/trans*-ratios were determined by <sup>1</sup>H NMR analysis of the crude reaction mixture using P-nitrotoluene as internal standard.

### 3.1.6. Screening of the amount of substrate: <sup>[a]</sup>

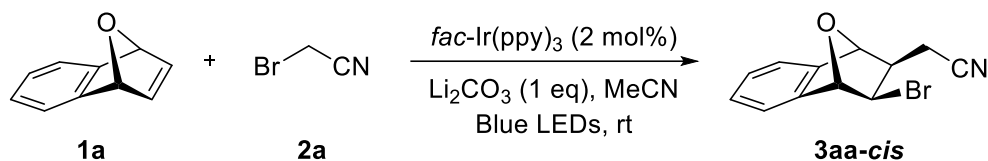

| Entry | 1a<br>(mmol) | 2a<br>(mmol) | photocatalyst                    | Base                            | Solvent | Time<br>(h) | Yield<br>(%) <sup>[b]</sup> | dr <sup>[b]</sup> |
|-------|--------------|--------------|----------------------------------|---------------------------------|---------|-------------|-----------------------------|-------------------|
| 1     | 0.2          | 0.3          | <i>fac</i> -Ir(ppy) <sub>3</sub> | Li <sub>2</sub> CO <sub>3</sub> | MeCN    | 12          | 76                          | 76:24             |
| 2     | 0.2          | 0.4          | <i>fac</i> -Ir(ppy) <sub>3</sub> | Li <sub>2</sub> CO <sub>3</sub> | MeCN    | 4           | 86                          | 85:15             |
| 3     | 0.2          | 0.6          | <i>fac</i> -Ir(ppy) <sub>3</sub> | Li <sub>2</sub> CO <sub>3</sub> | MeCN    | 4           | 84                          | 86:14             |
| 4     | 0.2          | 0.8          | <i>fac</i> -Ir(ppy) <sub>3</sub> | Li <sub>2</sub> CO <sub>3</sub> | MeCN    | 4           | 86                          | 85:15             |

<sup>[a]</sup>General conditions: **1a** (0.2 mmol), **2a** (0.4 mmol), *fac*-Ir(ppy)<sub>3</sub> (2 mol%) and Li<sub>2</sub>CO<sub>3</sub> (1 equiv) in solvent (2 mL) was irradiated with 30 W blue LEDs at room temperature under argon. <sup>[b]</sup>Combined yields and *cis/trans*-ratios were determined by <sup>1</sup>H NMR analysis of the crude reaction mixture using P-nitrotoluene as internal standard.

## 3.2. The iodoalkylation reaction of oxabenzonorbornadienes

### 3.2.1. controlled experiment: <sup>[a]</sup>

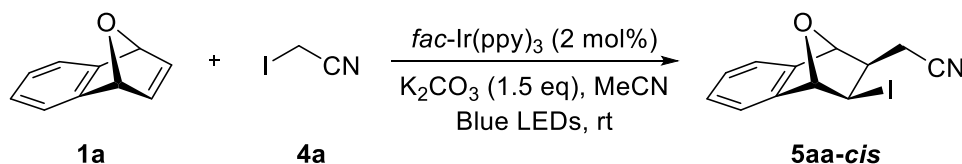

| Entry | photocatalyst                    | Base                           | Solvent | Light<br>source | Time<br>(h) | Yield<br>(%) <sup>[b]</sup> | d.r. <sup>[b]</sup> |
|-------|----------------------------------|--------------------------------|---------|-----------------|-------------|-----------------------------|---------------------|
| 1     | <i>fac</i> -Ir(ppy) <sub>3</sub> | K <sub>2</sub> CO <sub>3</sub> | MeCN    | blue            | 36          | 68                          | 64:36               |
| 2     | /                                | K <sub>2</sub> CO <sub>3</sub> | MeCN    | blue            | 36          | 47                          | 64:36               |
| 3     | <i>fac</i> -Ir(ppy) <sub>3</sub> | /                              | MeCN    | blue            | 36          | Trace <sup>[c]</sup>        | --                  |
| 4     | <i>fac</i> -Ir(ppy) <sub>3</sub> | K <sub>2</sub> CO <sub>3</sub> | MeCN    | /               | 36          | Trace <sup>[c]</sup>        | --                  |

<sup>[a]</sup>General conditions: **1a** (0.2 mmol), **4a** (0.6 mmol), photocatalyst (2 mol%) and K<sub>2</sub>CO<sub>3</sub> (1.5 equiv) in MeCN (2 mL) was irradiated with 30 W blue LEDs at room temperature under argon. <sup>[b]</sup>Combined yields and *cis/trans*-ratios were determined by <sup>1</sup>H NMR analysis of the crude reaction mixture using P-nitrotoluene as internal standard. <sup>[c]</sup>trace=Raw material is declining but no product is being monitored.

### 3.2.2. Screening for base and amounts: <sup>[a]</sup>

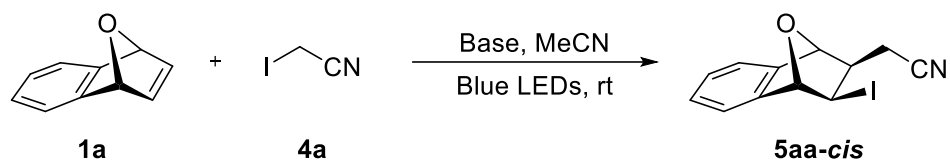

| Entry | Base                                          | Solvent | Time (h) | Yield (%) <sup>[b]</sup> | dr <sup>[b]</sup> |
|-------|-----------------------------------------------|---------|----------|--------------------------|-------------------|
| 1     | DBU                                           | MeCN    | 72       | 39                       | 61:39             |
| 2     | 2,6-Lutidine                                  | MeCN    | 72       | 47                       | 52:48             |
| 3     | Et <sub>3</sub> N                             | MeCN    | 72       | 52                       | 57:43             |
| 4     | K <sub>2</sub> CO <sub>3</sub>                | MeCN    | 10       | 87                       | 60:40             |
| 5     | LiOH                                          | MeCN    | 9        | 89                       | 64:36             |
| 6     | K <sub>2</sub> HPO <sub>4</sub>               | MeCN    | 72       | 40                       | 73:27             |
| 7     | NaOH                                          | MeCN    | 66       | 45                       | 68:32             |
| 8     | KOH                                           | MeCN    | 66       | 60                       | 66:34             |
| 9     | Li <sub>2</sub> CO <sub>3</sub>               | MeCN    | 66       | 42                       | 82:18             |
| 10    | PhCOOLi                                       | MeCN    | 66       | Trace <sup>[c]</sup>     | --                |
| 11    | Li <sub>2</sub> C <sub>2</sub> O <sub>4</sub> | MeCN    | 66       | 49                       | 57:43             |
| 12    | LiOAc                                         | MeCN    | 66       | 60                       | 52:48             |
| 13    | Li <sub>3</sub> PO <sub>4</sub>               | MeCN    | 66       | 50                       | 52:48             |

<sup>[a]</sup>General conditions: **1a** (0.2 mmol), **4a** (0.6 mmol) and base (1.5 equiv) in MeCN (2 mL) was irradiated with 30 W blue LEDs at room temperature under argon.

<sup>[b]</sup>Combined yields and *cis/trans*-ratios were determined by <sup>1</sup>H NMR analysis of the crude reaction mixture using P-nitrotoluene as internal standard. <sup>[c]</sup>trace=Raw material is declining but no product is being monitored.

| Entry | LiOH (equiv) | solvent | Time (h) | Yield (%) <sup>[b]</sup> | dr <sup>[b]</sup> |
|-------|--------------|---------|----------|--------------------------|-------------------|
| 1     | 1            | MeCN    | 30       | 66                       | 61:39             |
| 2     | 1.5          | MeCN    | 9        | 89                       | 64:36             |
| 3     | 2            | MeCN    | 6        | 89                       | 64:36             |
| 4     | 3            | MeCN    | 30       | 58                       | 62:38             |

### 3.2.3. Solvent screening: <sup>[a]</sup>

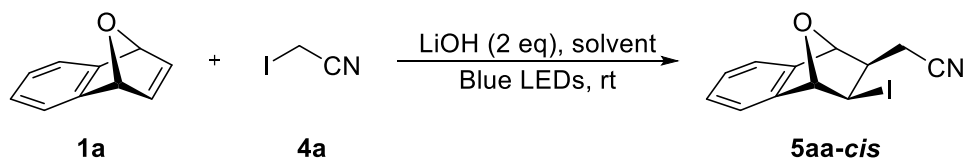

| Entry | Base | Solvent     | Time (h) | Yield (%) <sup>[b]</sup> | dr <sup>[b]</sup> |
|-------|------|-------------|----------|--------------------------|-------------------|
| 1     | LiOH | DCM         | 12       | 95                       | 66:34             |
| 2     | LiOH | DMSO        | 24       | Trace <sup>[c]</sup>     | --                |
| 3     | LiOH | Toluene     | 5        | 96                       | 68:32             |
| 4     | LiOH | THF         | 8        | 82                       | 65:35             |
| 5     | LiOH | 1,4-Dioxane | 24       | 91                       | 64:36             |
| 6     | LiOH | DMF         | 24       | Trace <sup>[c]</sup>     | --                |
| 7     | LiOH | MeOH        | 8        | 81                       | 61:39             |
| 8     | LiOH | EA          | 24       | 91                       | 66:34             |
| 9     | LiOH | DCE         | 24       | 86                       | 70:30             |

<sup>[a]</sup>General conditions: **1a** (0.2 mmol), **4a** (0.6 mmol) and LiOH (2 equiv) in solvent (2 mL) was irradiated with 30 W blue LEDs at room temperature under argon.

<sup>[b]</sup>Combined yields and *cis/trans*-ratios were determined by <sup>1</sup>H NMR analysis of the crude reaction mixture using P-nitrotoluene as internal standard. <sup>[c]</sup>trace=Raw material is declining but no product is being monitored.

#### 3.2.4. Light source screening: <sup>[a]</sup>

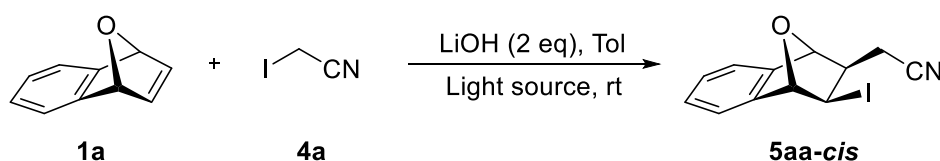

| Entry | Base | Solvent | Light source | Time (h) | Yield (%) <sup>[b]</sup> | dr <sup>[b]</sup> |
|-------|------|---------|--------------|----------|--------------------------|-------------------|
| 1     | LiOH | Toluene | 365 nm       | 16       | 92                       | 57:43             |
| 2     | LiOH | Toluene | 390 nm       | 7        | 93                       | 57:43             |
| 3     | LiOH | Toluene | 420 nm       | 14       | 87                       | 66:34             |
| 5     | LiOH | Toluene | 450 nm       | 5        | 96                       | 68:32             |

<sup>[a]</sup>General conditions: **1a** (0.2 mmol), **4a** (0.6 mmol) and LiOH (2 equiv) in Toluene (2 mL) was irradiated with 30 W LEDs at room temperature under argon.

<sup>[b]</sup>Combined yields and *cis/trans*-ratios were determined by <sup>1</sup>H NMR analysis of the crude reaction mixture using P-nitrotoluene as internal standard.

#### 3.2.5. Screening of the amount of substrate: <sup>[a]</sup>

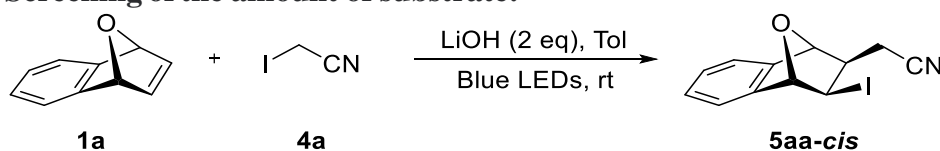

| Entry | 1a<br>(mmol) | 4a<br>(mmol) | Base | Solvent | Time<br>(h) | Yield<br>(%) <sup>[b]</sup> | dr <sup>[b]</sup> |
|-------|--------------|--------------|------|---------|-------------|-----------------------------|-------------------|
| 1     | 0.2          | 0.3          | LiOH | Tol     | 9           | 88                          | 65:35             |
| 2     | 0.2          | 0.4          | LiOH | Tol     | 5           | 96                          | 68:32             |
| 3     | 0.2          | 0.6          | LiOH | Tol     | 5           | 96                          | 68:32             |

<sup>[a]</sup>General conditions: **1a** (0.2 mmol), **4a** (0.4 mmol) and LiOH (2 equiv) in Toluene (2 mL) was irradiated with 30 W blue LEDs at room temperature under argon.

<sup>[b]</sup>Combined yields and *cis/trans*-ratios were determined by <sup>1</sup>H NMR analysis of the crude reaction mixture using P-nitrotoluene as internal standard.

## 4. Gram-scale reaction

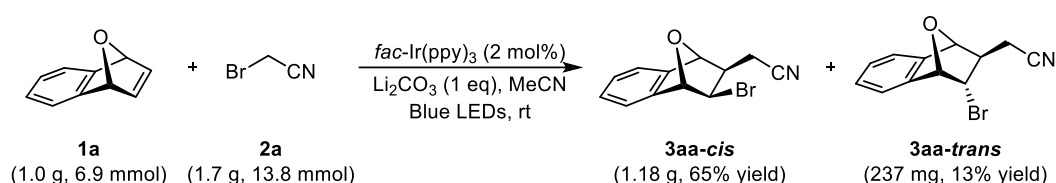

On the basis of the above experiment, in order to further confirm the practicality of the reaction system, we conducted a gram level reaction experiment on this reaction. **1a** (1.00 g, 6.9 mmol, 1 equiv), **2a** (1.70 g, 13.8 mmol, 2 equiv), *fac*-Ir(ppy)<sub>3</sub> (0.09 g, 2 mol%), Li<sub>2</sub>CO<sub>3</sub> (0.50 g, 6.9 mmol, 1 equiv), MeCN (20 mL) were added to a 50 mL round-bottomed flask. After that, the reaction bottle was stirred for 16 h under a 30 W blue light and cooled by a fan to ensure a constant reaction temperature. TLC was used to monitor the reaction process, and then the reaction liquid was concentrated by vacuum and the reaction product were purified by silica gel column to give **3aa-cis** (1.18 g, 65% yield) and **3aa-trans** (237 mg, 13% yield).

## 5. Mechanistic studies

### 5.1. Free radical trapping experiment:

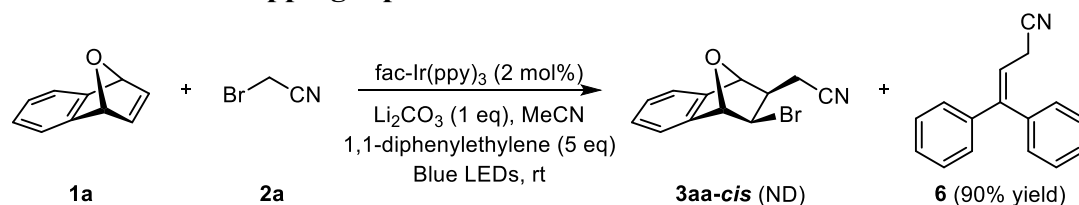

In N<sub>2</sub> atmosphere, a magnetic stirring rod was installed on the oven-dried Schlenk tube. **1a** (0.2 mmol, 1 equiv), **2a** (0.4 mmol, 2 equiv), *fac*-Ir(ppy)<sub>3</sub> (0.004 mmol, 0.02 equiv), Li<sub>2</sub>CO<sub>3</sub> (0.2 mmol, 1 equiv), 1,1-diphenylethylene (1.0 mmol, 5 equiv) and MeCN (2 mL) were added. The mixture was then irradiated for 4 h at room temperature with a 30 W blue LED (450 nm). In this process, 1,1-diphenylethylene acts as a free radical trapping agent and completely inhibits the production of the target product **3aa-cis**. The reaction mass was purified by flash chromatography, column eluted with petroleum ether in ethyl acetate to get 1,1-diphenylethylene adduct **6** (90%).

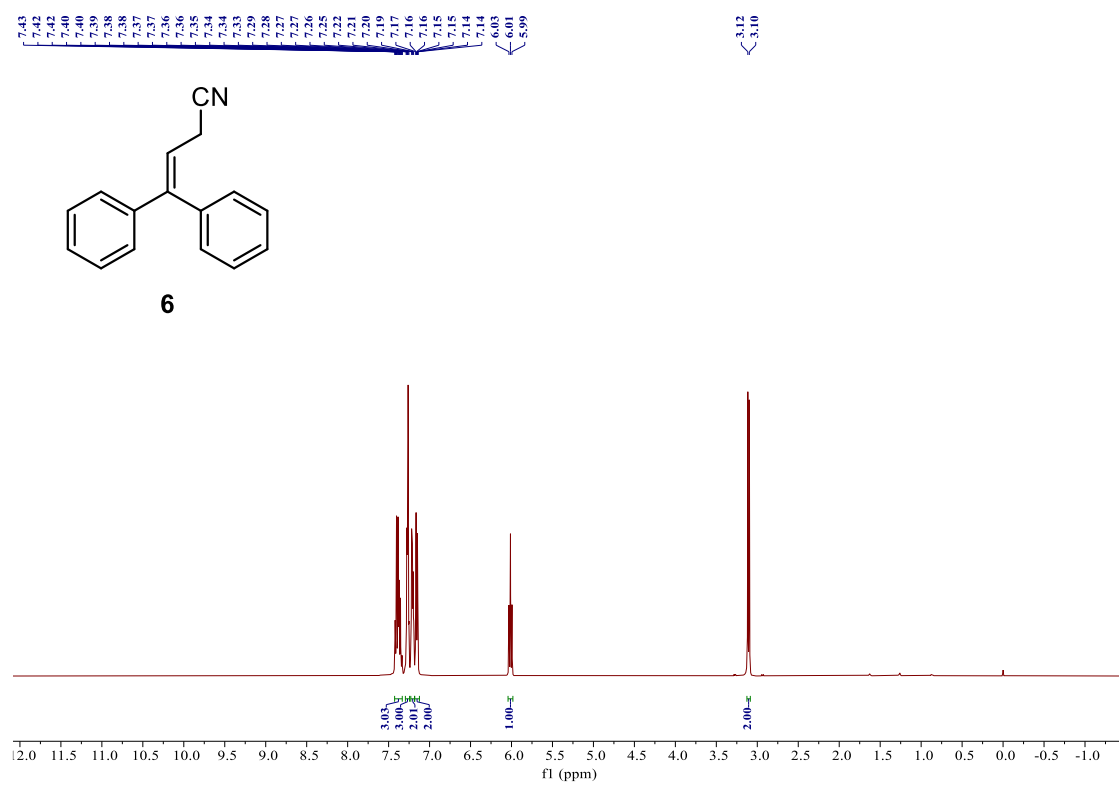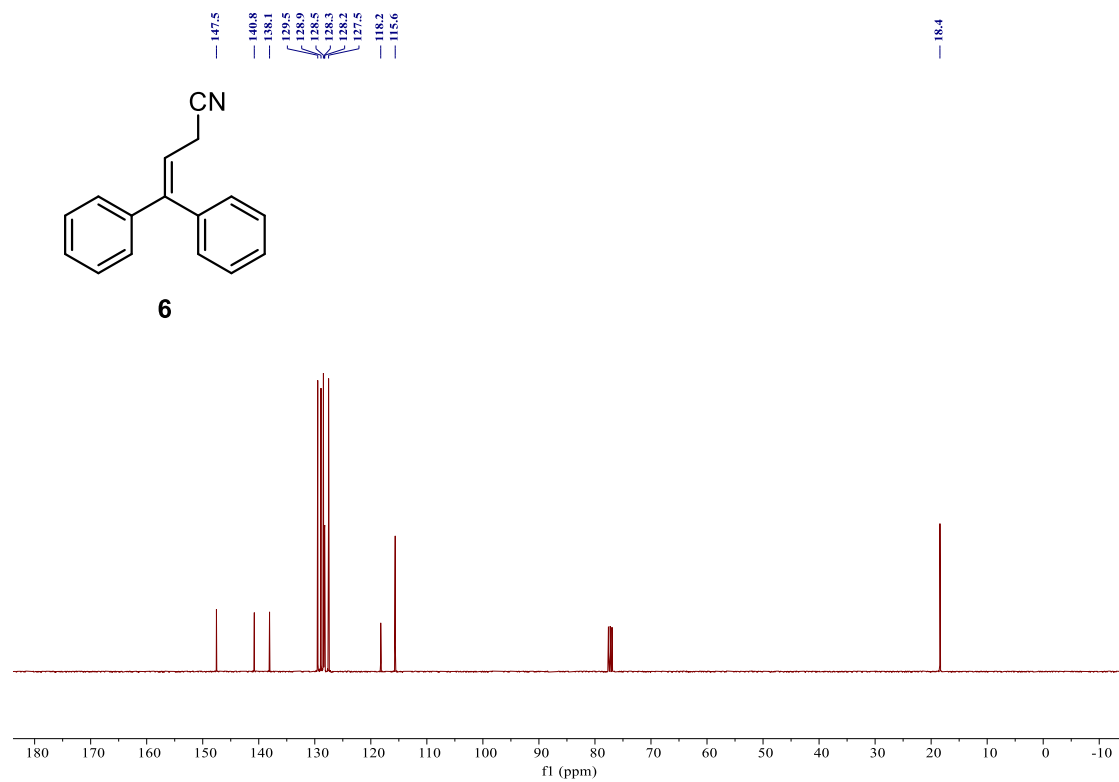

**Figure 1.** Free radical trapping experiment

## 5.2. Light/dark experiments

### 5.2.1. The bromoalkylation reaction of oxabenzonorbornadienes

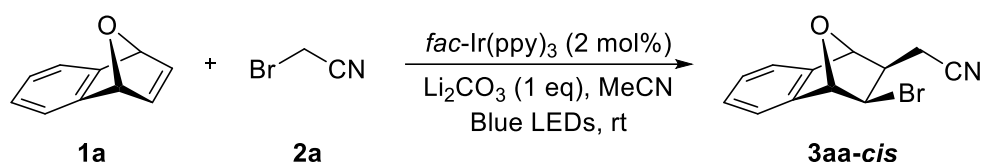

Take eight Schlenk tubes and add the same standard reaction mixture (0.2 mmol **1a**, 0.4 mmol **2a**, 0.2 mmol  $\text{Li}_2\text{CO}_3$ , 0.004 mmol  $\text{fac-Ir(ppy)}_3$ , MeCN (2 mL)) to each tube. Add a stirrer and stir the mixture. Illuminate with a blue LED at room temperature. After 1 hour, turn off the blue LED light and remove a Schlenk tube from the irradiation device for analysis. The remaining seven Schlumberger tubes were stirred for another hour without light. Then, take out a Schlenk tube for analysis, and turn on the blue LED again to illuminate the remaining six reaction tubes. After an additional hour of irradiation, turn off the blue LED light and remove a Schlenk tube for analysis, and so on until the last tube is removed and analyzed. Finally, combined yields were determined by  $^1\text{H}$  NMR analysis of the crude reaction mixture using P-nitrotoluene as internal standard.

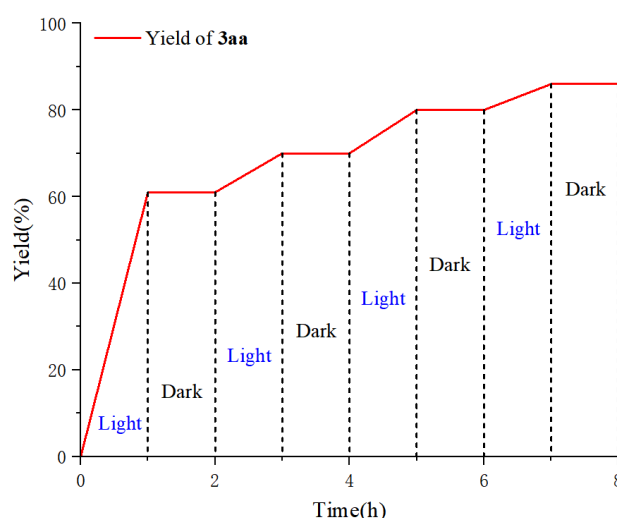

**Figure 2.** Light on-off experiments (a)

### 5.2.2. The iodoalkylation reaction of oxabenzonorbornadienes

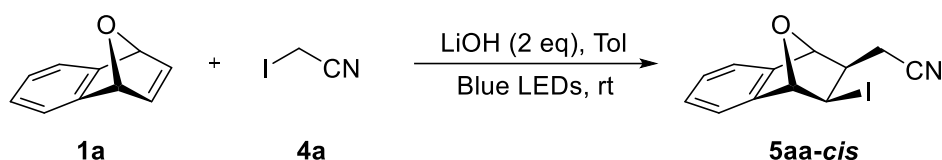

Take ten Schlenk tubes and add the same standard reaction mixture (0.2 mmol **1a**, 0.4 mmol **4a**, 0.2 mmol LiOH, MeCN (2 mL)) to each tube. Add a stirrer and stir the mixture. Illuminate with a blue LED at room temperature. After 1 hour, turn off the blue LED light and remove a Schlenk tube from the irradiation device for analysis. The remaining seven Schlumberger tubes were stirred for another hour without light. Then, take out a Schlenk tube for analysis, and turn on the blue LED again to illuminate the remaining six reaction tubes. After an additional hour of irradiation, turn off the blue

LED light and remove a Schlenk tube for analysis, and so on until the last tube is removed and analyzed. Finally, combined yields were determined by  $^1\text{H}$  NMR analysis of the crude reaction mixture using P-nitrotoluene as internal standard.

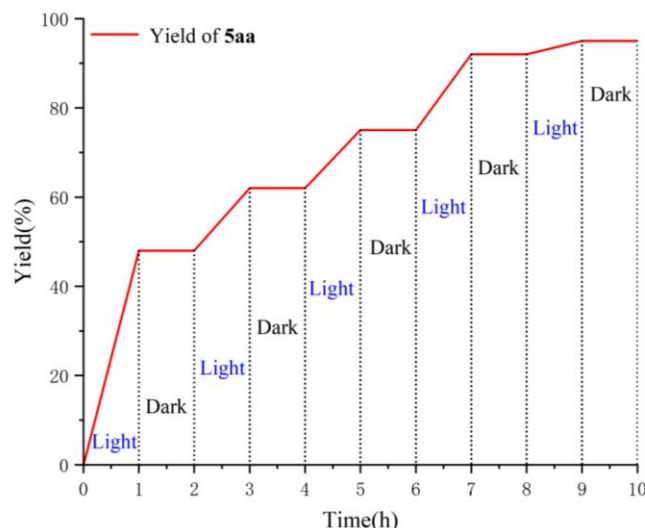

**Figure 3.** Light on-off experiments (b)

### 5.3. Stern-Volmer quenching experiments

We further monitored the effect of different concentrations of **1a** and **2a** on the steady-state luminescence emission spectra of *fac*-Ir(ppy)<sub>3</sub> solution with a concentration of  $1 \times 10^{-5}$  mol/L. We observed a drop of the *fac*-Ir(ppy)<sub>3</sub> luminescence signal upon increasing the **2a** concentration, with quenching of *fac*-Ir(ppy)<sub>3</sub> by **1a** with the same concentration as **2a** monitored by steady-state fluorimetry is not significant, which suggested that the **2a** acts as a quencher for the *fac*-Ir(ppy)<sub>3</sub> (Figure 3, Figure 4).

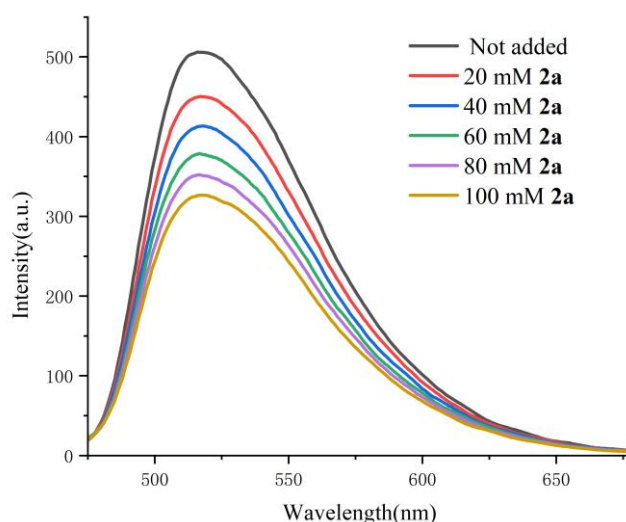

**Figure 4.** Fluorescence quenching experiment (a)

Quenching of *fac*-Ir(ppy)<sub>3</sub> by acetonitrile bromide **2a** monitored by steady-state fluorimetry. The luminescence spectrum of *fac*-Ir(ppy)<sub>3</sub> (0.01 mM in N<sub>2</sub>-saturated acetonitrile) was measured under 450 nm illumination, in the presence of increasing



amounts of acetonitrile bromide.

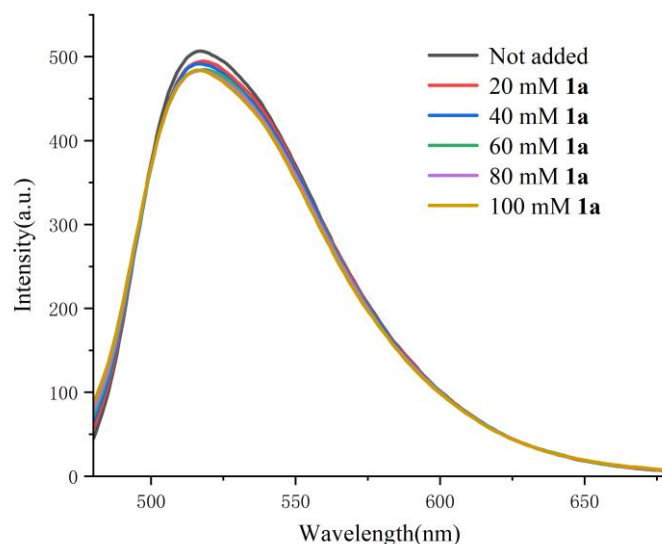

**Figure 5.** Fluorescence quenching experiment (b)

Quenching of *fac*-Ir(ppy)<sub>3</sub> by oxabenzonorbornadiene **1a** monitored by steady-state fluorimetry. The luminescence spectrum of *fac*-Ir(ppy)<sub>3</sub> (0.01 mM in N<sub>2</sub>-saturated acetonitrile) was measured under 450 nm illumination, in the presence of increasing amounts of oxabenzonorbornadiene.

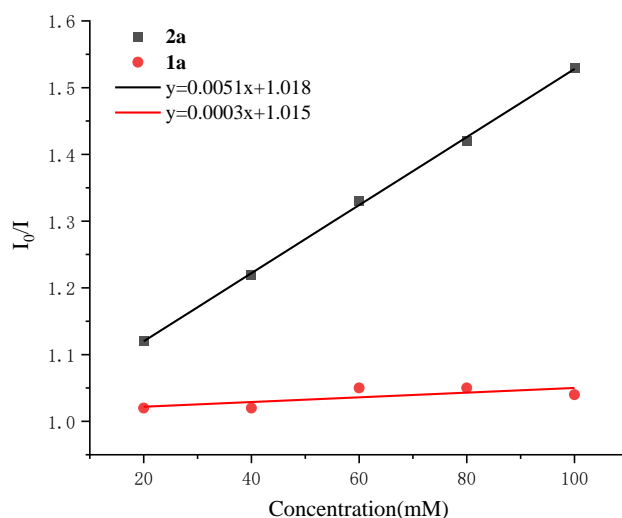

**Figure 6.** Fluorescence quenching experiment (c)

Stern-Volmer plots for the quenching of *fac*-Ir(ppy)<sub>3</sub> by **1a** and **2a** as monitored by steady-state fluorimetry.

#### 5.4. UV-vis absorption spectra of different reaction component

#### 5.4.1. The bromoalkylation reaction of oxabenzonorbornadienes

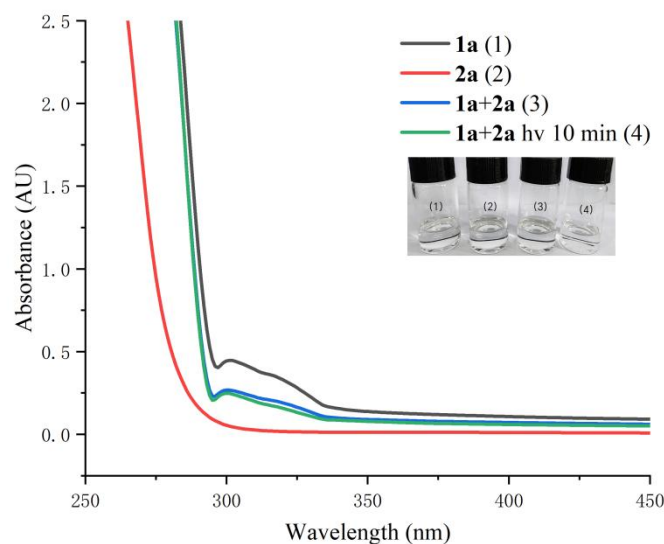

**Figure 7.** UV-vis absorption spectra of **1a** and **2a**

UV-vis spectrum of **1a** (0.1 M) and **2a** (0.2 M) in acetonitrile solution and their mixture, test immediately and after 10 min of irradiation (10 min, 30 W 450 nm blue LED). After **1a** and **2a** were mixed and upon blue-light irradiation for 10 minutes, there is no significant change in absorption.

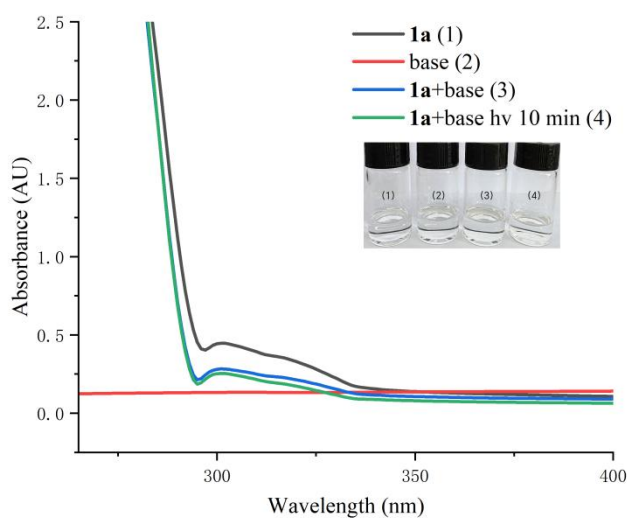

**Figure 8.** UV-vis absorption spectra of **1a** and base

UV-vis spectrum of **1a** (0.1 M) and base (0.1 M) in acetonitrile solution and their mixture, test immediately and after 10 min of irradiation (10 min, 30 W 450 nm blue LED). After **1a** and base were mixed and upon blue-light irradiation for 10 minutes, there is no significant change in absorption.

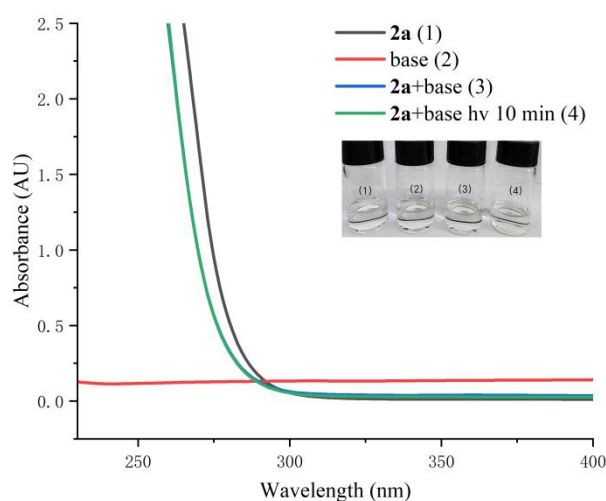

**Figure 9.** UV-vis absorption spectra of **2a** and base

UV-vis spectrum of **2a** (0.2 M) and base (0.1 M) in acetonitrile solution and their mixture, test immediately and after 10 min of irradiation (10 min, 30 W 450 nm blue LED). After **2a** and base were mixed and upon blue-light irradiation for 10 minutes, there is no significant change in absorption.

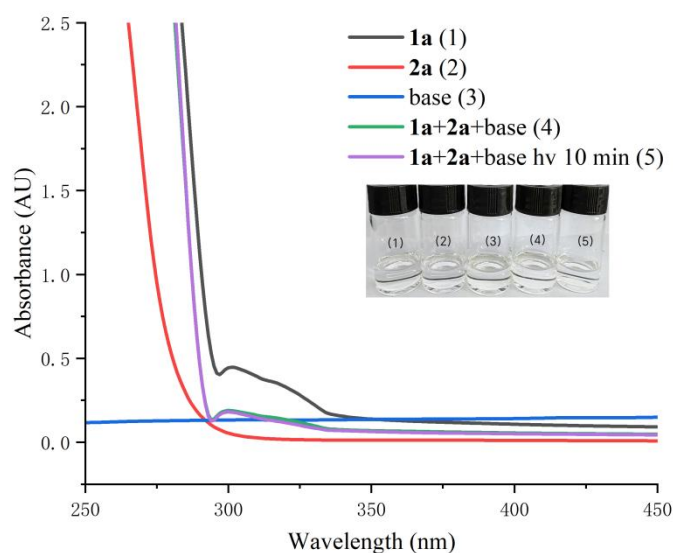

**Figure 10.** UV-vis absorption spectra of **1a**, **2a** and base

UV-vis spectrum of **1a** (0.1 M), **2a** (0.2 M) and base (0.1 M) in acetonitrile solution and their mixture, test immediately and after 10 min of irradiation (10 min, 30 W 450 nm blue LED). After **1a**, **2a** and base were mixed and upon blue-light irradiation for 10 minutes, there were corresponding changes in absorption.

#### 5.4.2. The iodoalkylation reaction of oxabenzonorbornadienes

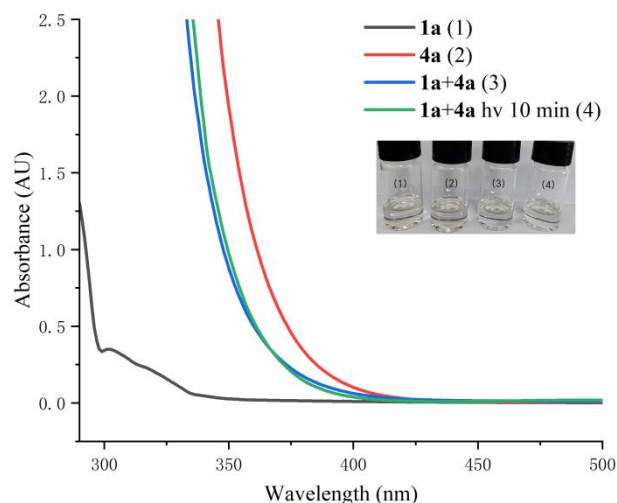

**Figure 11.** UV-vis absorption spectra of **1a** and **4a**

UV-vis spectrum of **1a** (0.1 M) and **4a** (0.2 M) in toluene solution and their mixture, test immediately and after 10 min of irradiation (10 min, 30 W 450 nm blue LED). After **1a** and **4a** were mixed and upon blue-light irradiation for 10 minutes, there is no significant change in absorption.

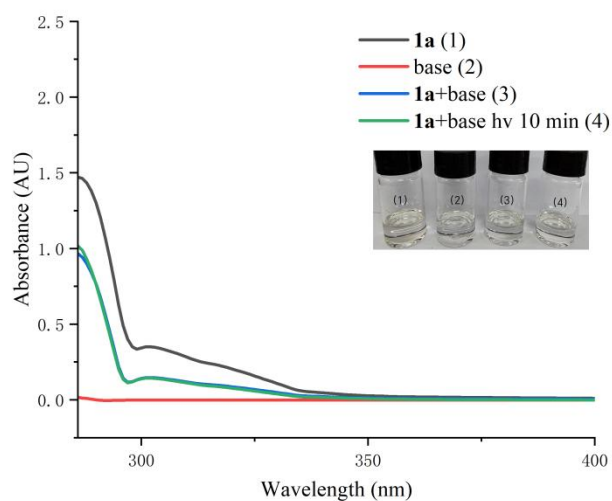

**Figure 12.** UV-vis absorption spectra of **1a** and base

UV-vis spectrum of **1a** (0.1 M) and base (0.2 M) in toluene solution and their mixture, test immediately and after 10 min of irradiation (10 min, 30 W 450 nm blue LED). After **1a** and base were mixed and upon blue-light irradiation for 10 minutes, there is no significant change in absorption.

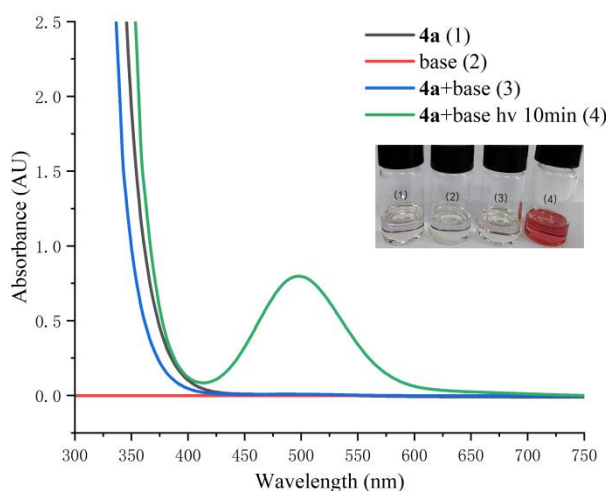

**Figure 13.** UV-vis absorption spectra of **4a** and base

UV-vis spectrum of **4a** (0.2 M) and base (0.2 M) in toluene solution and their mixture, test immediately and after 10 min of irradiation (10 min, 30 W 450 nm blue LED). After **4a** and base were mixed and upon blue-light irradiation for 10 minutes, the  $\text{ICH}_2\text{CN}/\text{LiOH}$  mixture turned red, accompanied by a corresponding red shift in the UV/Vis spectrum. A new absorption peak (green line) emerged in the irradiated mixture, which is attributed to charge-transfer absorption of an electron donor-acceptor (EDA) complex.

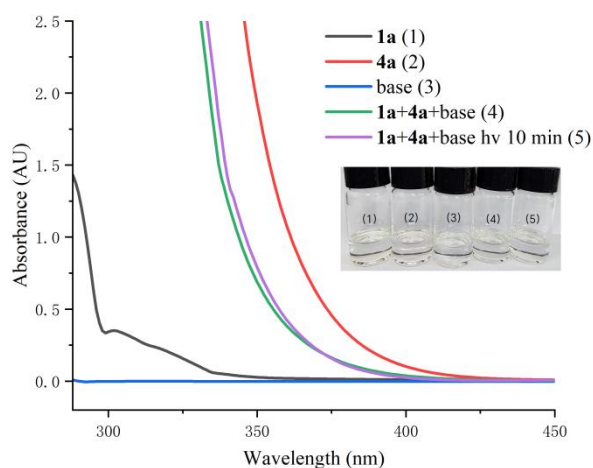

**Figure 14.** UV-vis absorption spectra of **1a**, **4a** and base

UV-vis spectrum of **1a** (0.1 M), **4a** (0.2 M) and base (0.2 M) in toluene solution and their mixture, test immediately and after 10 min of irradiation (10 min, 30 W 450 nm blue LED). After **1a**, **4a** and base were mixed and upon blue-light irradiation for 10 minutes, there were corresponding changes in absorption.

## 5.5. Measurement of Quantum Yields

The photon flux of blue LED was determined by standard ferrioxalate actinometry.

0.15 mol/L solution of ferrioxalate was prepared by dissolving potassium ferrioxalate hydrate (282 mg, 0.750 mmol) in 5.0 mL of 0.20 mol/L aqueous sulfuric acid. 0.15 mol/L buffered solution of 1,10-phenanthroline was prepared by dissolving 1,10-phenanthroline (54.1 mg, 0.3 mmol) and sodium acetate (1.23 g, 15.0 mmol) in 20 mL of 0.20 mol/L aqueous sulfuric acid. The actinometry measurements were done as follows: To a reaction tube equipped with a stir bar was added 0.50 mL of the ferrioxalate solution. The reaction tube was sealed and placed 2 cm away from a 20 W blue LEDs. After irradiation for 20 seconds, 1.5 mL of the aqueous sulfuric acid and 2.0 mL of the buffered solution was added to the reaction tube. The solution was then allowed to rest for 1 hour to allow the resultant ferrous ions to react completely with 1,10-phenanthroline. 50  $\mu$ L of the resulting solution was taken as an aliquot and diluted with 3.0 mL of 0.20 mol/L aqueous sulfuric acid. The absorbance of the resulting solution in a cuvette ( $l = 1.0$  cm) at 510 nm was measured by UV-V is spectrometer. A non-irradiated sample was also prepared and the absorbance at 510 nm was measured.

$$\text{mol Fe}^{2+} = \frac{V \times \Delta A}{l \times \epsilon}$$

The amount of ferrous ion formed was calculated as follows:

where  $V$  is the total volume (0.024 L) of the solution that was analyzed,  $\Delta A$  is the difference in absorbance at 510 nm between the irradiated and non-irradiated samples,  $l$  is the path length (1.00 cm), and  $\epsilon$  is the molar absorptivity at 510 nm (11,100 L/(mol•cm)).

The photon flux was calculated as follows:

$$\text{photo flux} = \frac{\text{mol Fe}^{2+}}{\Phi \times t \times f}$$

where  $\Phi$  is the quantum yield for the ferrioxalate actinometer (approximated as 0.845, which was reported for a 0.15 mol/L solution at  $\lambda = 457.9$  nm),  $t$  is the irradiation time, and  $f$  is the fraction of light absorbed at 450 nm (0.1302).

The fraction of light absorbed was determined by the following equation:

$$f = 1.0000 \cdot 10^{-A}$$

where  $A$  is the measured absorbance (0.0606) of the 0.15 mol/L solution of potassium ferrioxalate at 450 nm.

**The photo flux is  $2.05 \times 10^{-7}$  Einstein/s.**

### 5.5.1. Determination of quantum yield of bromoalkylation reaction of oxabenzonorbornadienes

In an oven-dried reaction tube containing a magnetic stirring bar was charged with a sample of oxabenzonorbornadiene **1a** (0.20 mmol), acetonitrile bromide **2a** (0.40 mmol), *fac*-Ir(ppy)<sub>3</sub> (2 mol%), Li<sub>2</sub>CO<sub>3</sub> (0.20 mmol), MeCN (2 mL). The reaction mixture was stirred under the irradiation of 30 W LED at room temperature and placed 2 cm away from 30 W blue LEDs. After irradiation for 4 hours, the moles of product **3aa** formed for the model reaction were determined by determined by <sup>1</sup>H NMR spectroscopy with P-nitrotoluene as the internal standard revealed 86% yield of **3aa** ( $17.2 \times 10^{-5}$  mol).

The quantum yield was calculated as follows:

$$\Phi = \frac{\text{mol product}}{\text{flux} \times t \times f}$$

where flux is the photon flux determined by ferrioxalate actinometry ( $2.05 \times 10^{-7}$  Einstein/s),  $t$  is the time, and  $f$  is the fraction of light absorbed by the irradiated reaction system at 450 nm, and the absorbance of the irradiated reaction system at 450 nm was 0.2079. The fraction of light absorbed at 450 nm was calculated:  $f = 1.0000 - 10^{-A} = 1.0000 - 10^{-0.2079} = 0.3804$ .

The quantum yield was calculated:  $\Phi = 0.15$

### 5.5.2. Determination of quantum yield of iodoalkylation reaction of oxabenzonorbornadienes

In an oven-dried reaction tube containing a magnetic stirring bar was charged with a sample of oxabenzonorbornadiene **1a** (0.20 mmol), acetonitrile iodide **4a** (0.40 mmol), LiOH (0.40 mmol), toluene (2 mL). The reaction mixture was stirred under the irradiation of 30 W LED at room temperature and placed 2 cm away from 30 W blue LEDs. After irradiation for 5 hours, the moles of product **5aa** formed for the model reaction were determined by determined by  $^1\text{H}$  NMR spectroscopy with P-nitrotoluene as the internal standard revealed 95% yield of **5aa** ( $1.9 \times 10^{-4}$  mol).

The quantum yield was calculated as follows:

$$\Phi = \frac{\text{mol product}}{\text{flux} \times t \times f}$$

where flux is the photon flux determined by ferrioxalate actinometry ( $2.05 \times 10^{-7}$  Einstein/s),  $t$  is the time, and  $f$  is the fraction of light absorbed by the irradiated reaction system at 450 nm, and the absorbance of the irradiated reaction system at 450 nm was 0.0608. The fraction of light absorbed at 450 nm was calculated:  $f = 1.0000 - 10^{-A} = 1.0000 - 10^{-0.0608} = 0.1306$ .

The quantum yield was calculated:  $\Phi = 0.39$

## 6. Crystallographic Data

### 6.1. Crystallographic Data of Substrate **5aa-cis**

Sample preparation: The single crystal of compound **5aa-cis** was cultivated in a 1.5 mL glass vial by slow evaporation technique. Compound **5aa-cis** (40 mg) was dissolved in the mixing solvent of dichloromethane/hexane (0.2 mL/0.8 mL) at ambient temperature. Dichloromethane and hexane spontaneously evaporate in the open air at 25 °C. After several days, the crystal of **5aa-cis** emerged and was collected for X-ray diffraction analysis.

Suitable single crystals of **5aa-cis** were mounted with nylon loops. Data was collected on an Oxford Diffraction XtalAB [Rigaku (Cu) Xray dual wavelength source,  $K\alpha$ ,  $\lambda = 1.5418 \text{ \AA}$ ] equipped with a monochromator and CCD plate detector (CrysAlisPro CCD, Oxford Diffraction Ltd) at 100 K. The structure was solved by direct methods and refined by full-matrix least-squares refinements based on  $F^2$  Single-crystal structures of compounds **5aa-cis** were solved by direct methods by ShelXS in

Olex2 1.2. All nonhydrogen atoms were refined with anisotropic thermal parameters, and all hydrogen atoms were included in calculated positions and refined with isotropic thermal parameters riding on those of the parent atoms. Crystal data and structure refinement parameters were summarized in following Table. CCDC Number 2443197 (**5aa-cis**) contain the supplementary crystallographic data for this paper.

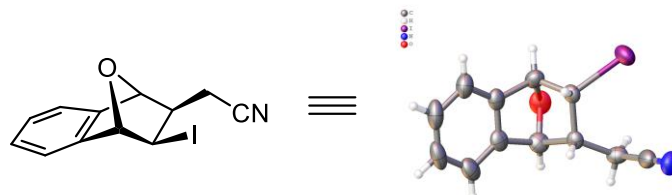

**Table 1. Crystal data and structure refinement for 1120-A\_auto (5aa-cis).**

|                                    |                                                               |
|------------------------------------|---------------------------------------------------------------|
| Identification code                | 1120-A_auto                                                   |
| Empirical formula                  | C <sub>12</sub> H <sub>10</sub> INO                           |
| Formula weight                     | 311.11                                                        |
| Temperature/K                      | 293                                                           |
| Crystal system                     | orthorhombic                                                  |
| Space group                        | Pbca                                                          |
| a/Å                                | 12.7130(3)                                                    |
| b/Å                                | 9.9112(3)                                                     |
| c/Å                                | 17.8424(4)                                                    |
| α/°                                | 90                                                            |
| β/°                                | 90                                                            |
| γ/°                                | 90                                                            |
| Volume/Å <sup>3</sup>              | 2248.16(10)                                                   |
| Z                                  | 8                                                             |
| ρ <sub>calc</sub> /cm <sup>3</sup> | 1.838                                                         |
| μ/mm <sup>-1</sup>                 | 2.821                                                         |
| F(000)                             | 1200.0                                                        |
| Crystal size/mm <sup>3</sup>       | 0.06 × 0.05 × 0.04                                            |
| Radiation                          | Mo Kα (λ = 0.71073)                                           |
| 2θ range for data collection/°     | 6.93 to 58.678                                                |
| Index ranges                       | -16 ≤ h ≤ 16, -13 ≤ k ≤ 8, -23 ≤ l ≤ 23                       |
| Reflections collected              | 16884                                                         |
| Independent reflections            | 2840 [R <sub>int</sub> = 0.0272, R <sub>sigma</sub> = 0.0200] |
| Data/restraints/parameters         | 2840/0/148                                                    |
| Goodness-of-fit on F <sup>2</sup>  | 1.042                                                         |
| Final R indexes [I ≥ 2σ (I)]       | R <sub>1</sub> = 0.0338, wR <sub>2</sub> = 0.0705             |
| Final R indexes [all data]         | R <sub>1</sub> = 0.0568, wR <sub>2</sub> = 0.0811             |



Largest diff. peak/hole / e Å<sup>-3</sup> 0.35/-0.82

**Table 2. Fractional Atomic Coordinates (×10<sup>4</sup>) and Equivalent Isotropic Displacement Parameters (Å<sup>2</sup>×10<sup>3</sup>) for 1120-A\_auto. U<sub>eq</sub> is defined as 1/3 of the trace of the orthogonalised U<sub>ij</sub> tensor.**

| Atom | x         | y         | z          | U(eq)     |
|------|-----------|-----------|------------|-----------|
| I1   | 2502.7(2) | 5244.2(3) | 5448.8(2)  | 59.39(12) |
| O1   | 3187(2)   | 4498(2)   | 3578.1(14) | 49.4(6)   |
| C9   | 2891(2)   | 6247(3)   | 4405.7(16) | 34.5(6)   |
| C5   | 3427(3)   | 6371(3)   | 2847.3(18) | 41.7(7)   |
| C4   | 4198(3)   | 6382(3)   | 3397.0(18) | 41.2(7)   |
| C10  | 2014(2)   | 6253(3)   | 3791.4(17) | 32.8(6)   |
| C11  | 921(3)    | 5643(4)   | 3998(2)    | 42.4(8)   |
| N1   | -82(3)    | 7282(4)   | 4847(2)    | 71.2(10)  |
| C8   | 2578(3)   | 5466(3)   | 3158(2)    | 43.0(7)   |
| C12  | 366(3)    | 6511(4)   | 4476(2)    | 50.4(9)   |
| C7   | 3778(3)   | 5466(3)   | 4009(2)    | 43.0(8)   |
| C6   | 3518(3)   | 7171(4)   | 2217.7(19) | 53.0(9)   |
| C3   | 5086(3)   | 7170(4)   | 3328(2)    | 54.0(9)   |
| C1   | 4415(4)   | 7952(4)   | 2146(2)    | 62.4(11)  |
| C2   | 5185(3)   | 7946(4)   | 2687(2)    | 63.4(11)  |

**Table 3. Anisotropic Displacement Parameters (Å<sup>2</sup>×10<sup>3</sup>) for 1120-A\_auto. The Anisotropic displacement factor exponent takes the form: - 2π<sup>2</sup>[h<sup>2</sup>a<sup>2</sup>U<sub>11</sub>+2hka\*b\*U<sub>12</sub>+...].**

| Atom | U <sub>11</sub> | U <sub>22</sub> | U <sub>33</sub> | U <sub>23</sub> | U <sub>13</sub> | U <sub>12</sub> |
|------|-----------------|-----------------|-----------------|-----------------|-----------------|-----------------|
| I1   | 59.69(17)       | 76.5(2)         | 41.98(16)       | 18.75(12)       | -0.45(12)       | -7.67(13)       |
| O1   | 61.6(15)        | 24.0(11)        | 62.7(16)        | -1.8(11)        | 9.0(12)         | 5.6(10)         |
| C9   | 40.7(15)        | 28.6(15)        | 34.2(16)        | 3.8(13)         | 2.1(13)         | -6.2(13)        |
| C5   | 50.4(19)        | 34.5(17)        | 40.4(18)        | -7.5(14)        | 10.8(15)        | 6.2(14)         |
| C4   | 45.6(18)        | 35.3(16)        | 42.8(18)        | -2.5(15)        | 13.4(15)        | 4.4(14)         |
| C10  | 38.0(16)        | 24.2(14)        | 36.2(17)        | 2.7(13)         | 3.4(13)         | -1.3(12)        |
| C11  | 45.4(19)        | 34.0(19)        | 48(2)           | 2.4(17)         | -13.4(16)       | -4.9(15)        |
| N1   | 51(2)           | 102(3)          | 60(2)           | 1(2)            | 13.5(18)        | 12(2)           |
| C8   | 51.9(19)        | 35.1(16)        | 41.8(18)        | -10.1(14)       | -0.6(15)        | -1.2(15)        |
| C12  | 36.4(17)        | 69(3)           | 46(2)           | 15.6(19)        | -0.2(15)        | -10.0(17)       |
| C7   | 38.8(17)        | 39.9(18)        | 50(2)           | 6.8(16)         | -0.6(15)        | 5.0(14)         |
| C6   | 69(2)           | 54(2)           | 35.6(18)        | -2.0(16)        | 13.1(17)        | 11.6(19)        |
| C3   | 49(2)           | 56(2)           | 57(2)           | -3.7(19)        | 16.9(18)        | -4.5(17)        |
| C1   | 83(3)           | 54(2)           | 51(2)           | 7.0(19)         | 35(2)           | 5(2)            |

|    |       |       |       |       |       |        |
|----|-------|-------|-------|-------|-------|--------|
| C2 | 67(3) | 54(2) | 70(3) | -4(2) | 37(2) | -11(2) |
|----|-------|-------|-------|-------|-------|--------|

**Table 4. Bond Lengths for 1120-A\_auto.**

| Atom | Atom | Length/Å | Atom | Atom | Length/Å |
|------|------|----------|------|------|----------|
| I1   | C9   | 2.167(3) | C4   | C3   | 1.379(5) |
| O1   | C8   | 1.443(4) | C10  | C11  | 1.559(5) |
| O1   | C7   | 1.442(4) | C10  | C8   | 1.549(4) |
| C9   | C10  | 1.564(4) | C11  | C12  | 1.402(5) |
| C9   | C7   | 1.539(4) | N1   | C12  | 1.160(5) |
| C5   | C4   | 1.387(5) | C6   | C1   | 1.384(6) |
| C5   | C8   | 1.509(5) | C3   | C2   | 1.385(6) |
| C5   | C6   | 1.380(5) | C1   | C2   | 1.374(6) |
| C4   | C7   | 1.517(4) |      |      |          |

**Table 5. Bond Angles for 1120-A\_auto.**

| Atom | Atom | Atom | Angle/°  | Atom | Atom | Atom | Angle/°  |
|------|------|------|----------|------|------|------|----------|
| C7   | O1   | C8   | 96.5(2)  | C12  | C11  | C10  | 110.7(3) |
| C10  | C9   | I1   | 116.2(2) | O1   | C8   | C5   | 101.7(3) |
| C7   | C9   | I1   | 109.3(2) | O1   | C8   | C10  | 101.8(3) |
| C7   | C9   | C10  | 101.7(2) | C5   | C8   | C10  | 107.5(2) |
| C4   | C5   | C8   | 104.5(3) | N1   | C12  | C11  | 176.6(4) |
| C6   | C5   | C4   | 120.8(3) | O1   | C7   | C9   | 101.4(2) |
| C6   | C5   | C8   | 134.5(3) | O1   | C7   | C4   | 101.4(3) |
| C5   | C4   | C7   | 104.8(3) | C4   | C7   | C9   | 106.8(2) |
| C3   | C4   | C5   | 121.4(3) | C5   | C6   | C1   | 117.7(4) |
| C3   | C4   | C7   | 133.8(3) | C4   | C3   | C2   | 117.6(4) |
| C11  | C10  | C9   | 117.9(3) | C2   | C1   | C6   | 121.4(4) |
| C8   | C10  | C9   | 100.3(2) | C1   | C2   | C3   | 121.2(4) |
| C8   | C10  | C11  | 112.9(3) |      |      |      |          |

**Table 6. Torsion Angles for 1120-A\_auto.**

| A  | B   | C   | D   | Angle/°   | A  | B   | C   | D   | Angle/°   |
|----|-----|-----|-----|-----------|----|-----|-----|-----|-----------|
| I1 | C9  | C10 | C11 | 4.5(4)    | C8 | O1  | C7  | C9  | 58.3(3)   |
| I1 | C9  | C10 | C8  | -118.6(2) | C8 | O1  | C7  | C4  | -51.6(3)  |
| I1 | C9  | C7  | O1  | 88.1(2)   | C8 | C5  | C4  | C7  | 0.6(3)    |
| I1 | C9  | C7  | C4  | -166.2(2) | C8 | C5  | C4  | C3  | -176.5(3) |
| C9 | C10 | C11 | C12 | 73.8(4)   | C8 | C5  | C6  | C1  | 175.4(3)  |
| C9 | C10 | C8  | O1  | 35.3(3)   | C8 | C10 | C11 | C12 | -169.8(3) |
| C9 | C10 | C8  | C5  | -71.1(3)  | C7 | O1  | C8  | C5  | 52.3(3)   |
| C5 | C4  | C7  | O1  | 32.3(3)   | C7 | O1  | C8  | C10 | -58.6(3)  |

|              |          |             |           |
|--------------|----------|-------------|-----------|
| C5 C4 C7 C9  | -73.5(3) | C7C9 C10C11 | 123.0(3)  |
| C5 C4 C3 C2  | -0.4(5)  | C7C9 C10C8  | 0.0(3)    |
| C5 C6 C1 C2  | -0.7(5)  | C7C4 C3 C2  | -176.5(3) |
| C4 C5 C8 O1  | -33.3(3) | C6C5 C4 C7  | 176.0(3)  |
| C4 C5 C8 C10 | 73.2(3)  | C6C5 C4 C3  | -1.1(5)   |
| C4 C5 C6 C1  | 1.6(5)   | C6C5 C8 O1  | 152.2(3)  |
| C4 C3 C2 C1  | 1.4(6)   | C6C5 C8 C10 | -101.3(4) |
| C10C9 C7 O1  | -35.3(3) | C6C1 C2 C3  | -0.8(6)   |
| C10C9 C7 C4  | 70.4(3)  | C3C4 C7 O1  | -151.1(4) |
| C11C10C8 O1  | -91.1(3) | C3C4 C7 C9  | 103.1(4)  |
| C11C10C8 C5  | 162.5(3) |             |           |

**Table 7. Hydrogen Atom Coordinates ( $\text{\AA} \times 10^4$ ) and Isotropic Displacement Parameters ( $\text{\AA}^2 \times 10^3$ ) for 1120-A<sub>auto</sub>.**

| Atom | <i>x</i> | <i>y</i> | <i>z</i> | U(eq) |
|------|----------|----------|----------|-------|
| H9   | 3120     | 7173.13  | 4507.34  | 41    |
| H8   | 2108.38  | 5073.17  | 2781     | 52    |
| H7   | 4311.92  | 5081.08  | 4342.44  | 52    |
| H6   | 2994.41  | 7184.8   | 1853.63  | 64    |
| H3   | 5600.55  | 7180.3   | 3698.71  | 65    |
| H1   | 4497.45  | 8492.07  | 1724.31  | 75    |
| H2   | 5783.36  | 8473     | 2620.12  | 76    |
| H10  | 1900(20) | 7100(30) | 3656(16) | 25(7) |
| H11A | 900(20)  | 4940(30) | 4153(16) | 16(8) |
| H11B | 630(20)  | 5570(30) | 3611(18) | 28(8) |

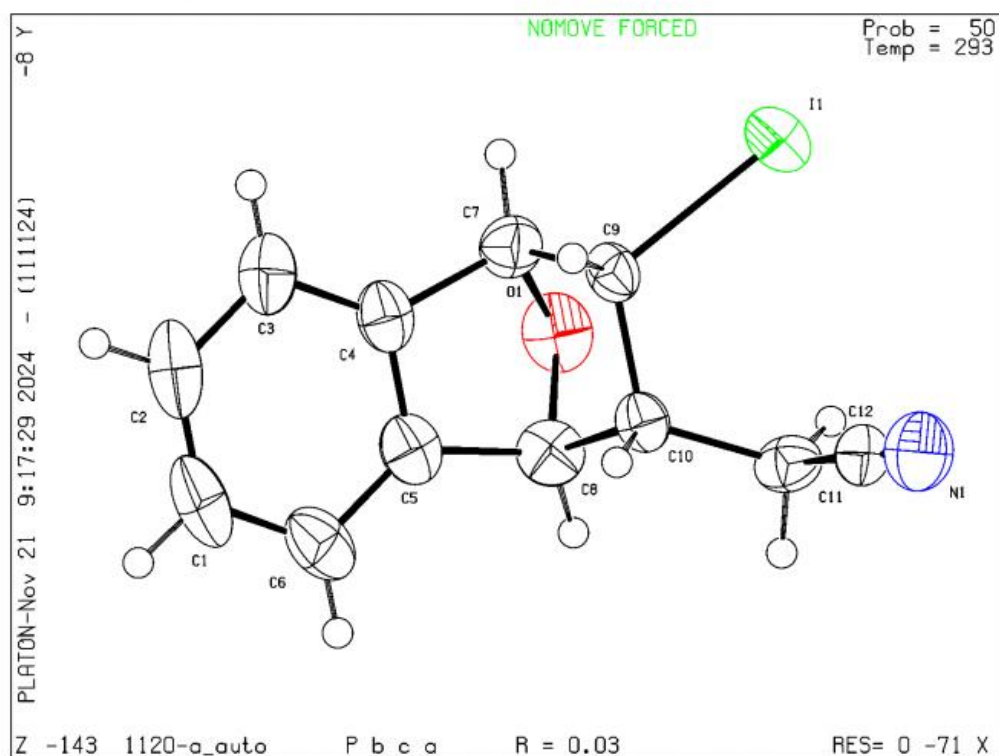

## 6.2. Crystallographic Data of Substrate **5aa-trans**

Sample preparation: The single crystal of compound **5aa-trans** was cultivated in a 1.5 mL glass vial by slow evaporation technique. Compound **5aa-trans** (40 mg) was dissolved in the mixing solvent of Dichloromethane/hexane (0.2 mL/0.8 mL) at ambient temperature. Dichloromethane and hexane spontaneously evaporate in the open air at 25 °C. After several days, the crystal of **5aa-trans** emerged and was collected for X-ray diffraction analysis.

Suitable single crystals of **5aa-trans** were mounted with nylon loops. Data was collected on an Oxford Diffraction XtalAB [Rigaku (Cu) Xray dual wavelength source,  $K\alpha$ ,  $\lambda = 1.5418 \text{ \AA}$ ] equipped with a monochromator and CCD plate detector (CrysAlisPro CCD, Oxford Diffraction Ltd) at 100 K. The structure was solved by direct methods and refined by full-matrix least-squares refinements based on  $F^2$ . Single-crystal structures of compounds **5aa-trans** were solved by direct methods by ShelXS in Olex2 1.2. All nonhydrogen atoms were refined with anisotropic thermal parameters, and all hydrogen atoms were included in calculated positions and refined with isotropic thermal parameters riding on those of the parent atoms. Crystal data and structure refinement parameters were summarized in following Table. CCDC Number 2443198 (**5aa-trans**) contain the supplementary crystallographic data for this paper.

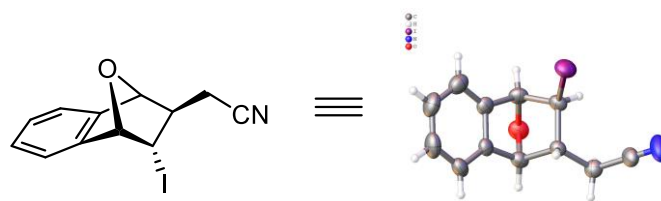

**Table 8. Crystal data and structure refinement for 1120-B\_auto (5aa-trans).**

|                                             |                                                               |
|---------------------------------------------|---------------------------------------------------------------|
| Identification code                         | 1120-B_auto                                                   |
| Empirical formula                           | C <sub>12</sub> H <sub>10</sub> INO                           |
| Formula weight                              | 311.11                                                        |
| Temperature/K                               | 293                                                           |
| Crystal system                              | monoclinic                                                    |
| Space group                                 | P2 <sub>1</sub> /c                                            |
| a/Å                                         | 13.9738(8)                                                    |
| b/Å                                         | 8.8365(4)                                                     |
| c/Å                                         | 9.5185(5)                                                     |
| α/°                                         | 90                                                            |
| β/°                                         | 101.071(6)                                                    |
| γ/°                                         | 90                                                            |
| Volume/Å <sup>3</sup>                       | 1153.47(11)                                                   |
| Z                                           | 4                                                             |
| ρ <sub>calc</sub> /g/cm <sup>3</sup>        | 1.792                                                         |
| μ/mm <sup>-1</sup>                          | 2.749                                                         |
| F(000)                                      | 600.0                                                         |
| Crystal size/mm <sup>3</sup>                | 0.07 × 0.06 × 0.05                                            |
| Radiation                                   | Mo Kα (λ = 0.71073)                                           |
| 2θ range for data collection/°              | 6.644 to 58.608                                               |
| Index ranges                                | -18 ≤ h ≤ 19, -12 ≤ k ≤ 11, -11 ≤ l ≤ 12                      |
| Reflections collected                       | 9557                                                          |
| Independent reflections                     | 2795 [R <sub>int</sub> = 0.0395, R <sub>sigma</sub> = 0.0392] |
| Data/restraints/parameters                  | 2795/0/136                                                    |
| Goodness-of-fit on F <sup>2</sup>           | 1.071                                                         |
| Final R indexes [I ≥ 2σ (I)]                | R <sub>1</sub> = 0.0356, wR <sub>2</sub> = 0.0774             |
| Final R indexes [all data]                  | R <sub>1</sub> = 0.0471, wR <sub>2</sub> = 0.0844             |
| Largest diff. peak/hole / e Å <sup>-3</sup> | 0.38/-1.09                                                    |

**Table 9. Fractional Atomic Coordinates (×10<sup>4</sup>) and Equivalent Isotropic Displacement Parameters (Å<sup>2</sup>×10<sup>3</sup>) for 1120-B\_auto. U<sub>eq</sub> is defined as 1/3 of the trace of the orthogonalised U<sub>ij</sub> tensor.**

| Atom | x         | y         | z         | U(eq)     |
|------|-----------|-----------|-----------|-----------|
| I001 | 6722.0(2) | 3322.6(3) | 2656.2(2) | 52.62(12) |

|      |            |         |         |          |
|------|------------|---------|---------|----------|
| O002 | 8796.4(16) | 6053(3) | 5426(2) | 42.8(5)  |
| C003 | 8022(2)    | 4429(3) | 3725(3) | 35.1(6)  |
| C004 | 8330(2)    | 5843(3) | 2952(3) | 31.6(6)  |
| C005 | 7469(2)    | 7457(4) | 4410(3) | 33.8(6)  |
| C006 | 7125(2)    | 6204(4) | 5054(3) | 36.6(7)  |
| C007 | 9287(2)    | 5609(4) | 2409(3) | 40.1(7)  |
| N008 | 9145(3)    | 3555(4) | 436(5)  | 76.1(12) |
| C009 | 7946(2)    | 5068(4) | 5204(3) | 39.7(7)  |
| C00A | 9211(2)    | 4451(4) | 1311(4) | 45.6(8)  |
| C00B | 8461(2)    | 7017(3) | 4186(3) | 36.3(7)  |
| C00C | 6894(3)    | 8731(4) | 4059(3) | 43.8(8)  |
| C00D | 6207(3)    | 6194(5) | 5370(4) | 51.4(9)  |
| C00E | 5976(3)    | 8724(5) | 4391(4) | 57.3(10) |
| C00F | 5628(3)    | 7492(5) | 5029(4) | 57.5(10) |

**Table 10. Anisotropic Displacement Parameters ( $\text{\AA}^2 \times 10^3$ ) for 1120-B\_auto. The Anisotropic displacement factor exponent takes the form: -  $2\pi^2[\text{h}^2\text{a}^2\text{U}_{11}+2\text{hka}*\text{b}*\text{U}_{12}+\dots]$ .**

| Atom | U <sub>11</sub> | U <sub>22</sub> | U <sub>33</sub> | U <sub>23</sub> | U <sub>13</sub> | U <sub>12</sub> |
|------|-----------------|-----------------|-----------------|-----------------|-----------------|-----------------|
| I001 | 54.24(18)       | 43.74(17)       | 58.30(18)       | -7.06(10)       | 6.81(12)        | -15.88(10)      |
| O002 | 38.6(12)        | 48.2(13)        | 35.9(11)        | 3.3(10)         | -7.0(9)         | 0.7(10)         |
| C003 | 33.1(15)        | 29.1(15)        | 40.5(15)        | 4.6(13)         | 0.6(12)         | 1.8(12)         |
| C004 | 30.5(15)        | 28.7(15)        | 33.8(14)        | 1.7(12)         | 2.3(11)         | 1.2(11)         |
| C005 | 39.4(17)        | 33.1(17)        | 27.8(13)        | -5.8(12)        | 3.7(12)         | 1.7(13)         |
| C006 | 41.4(18)        | 42.2(18)        | 24.6(13)        | -1.2(13)        | 2.4(12)         | -0.2(14)        |
| C007 | 31.8(16)        | 44.3(19)        | 43.0(16)        | 0.8(14)         | 3.6(13)         | 0.3(14)         |
| N008 | 61(2)           | 68(3)           | 104(3)          | -39(2)          | 27(2)           | -5.8(18)        |
| C009 | 43.9(18)        | 39.0(18)        | 34.1(14)        | 9.1(13)         | 2.2(13)         | -1.1(14)        |
| C00A | 33.9(17)        | 41.4(19)        | 63(2)           | -4.5(17)        | 14.0(15)        | 4.1(14)         |
| C00B | 40.0(17)        | 32.1(16)        | 34.0(15)        | 1.7(13)         | 0.4(13)         | -2.4(13)        |
| C00C | 57(2)           | 33.3(17)        | 41.0(17)        | -3.4(14)        | 8.2(15)         | 5.7(15)         |
| C00D | 54(2)           | 63(2)           | 39.3(17)        | -3.9(17)        | 13.1(16)        | -8.7(19)        |
| C00E | 54(2)           | 63(2)           | 54(2)           | -10.0(19)       | 7.8(18)         | 23(2)           |
| C00F | 44(2)           | 76(3)           | 56(2)           | -8(2)           | 17.8(17)        | 9(2)            |

**Table 11. Bond Lengths for 1120-B\_auto.**

| AtomAtom  | Length/ $\text{\AA}$ | AtomAtom  | Length/ $\text{\AA}$ |
|-----------|----------------------|-----------|----------------------|
| I001 C003 | 2.140(3)             | C005 C00C | 1.386(4)             |
| O002 C009 | 1.455(4)             | C006 C009 | 1.510(4)             |
| O002 C00B | 1.458(3)             | C006 C00D | 1.373(5)             |
| C003 C004 | 1.553(4)             | C007 C00A | 1.453(5)             |

|           |          |           |          |
|-----------|----------|-----------|----------|
| C003 C009 | 1.539(4) | N008 C00A | 1.139(4) |
| C004 C007 | 1.536(4) | C00C C00E | 1.379(5) |
| C004 C00B | 1.552(4) | C00DC00F  | 1.406(6) |
| C005 C006 | 1.394(4) | C00E C00F | 1.379(6) |
| C005 C00B | 1.494(4) |           |          |

**Table 12. Bond Angles for 1120-B\_auto.**

| AtomAtomAtom   | Angle/°    | AtomAtomAtom   | Angle/°  |
|----------------|------------|----------------|----------|
| C009 O002 C00B | 96.1(2)    | C00A C007 C004 | 112.9(3) |
| C004 C003 I001 | 115.46(18) | O002 C009 C003 | 98.9(2)  |
| C009 C003 I001 | 113.7(2)   | O002 C009 C006 | 101.6(2) |
| C009 C003 C004 | 102.3(2)   | C006 C009 C003 | 110.0(2) |
| C007 C004 C003 | 112.9(2)   | N008 C00A C007 | 179.0(4) |
| C007 C004 C00B | 111.2(2)   | O002 C00B C004 | 101.2(2) |
| C00B C004 C003 | 100.5(2)   | O002 C00B C005 | 101.5(2) |
| C006 C005 C00B | 105.3(3)   | C005 C00B C004 | 107.7(2) |
| C00C C005 C006 | 121.2(3)   | C00E C00C C005 | 117.5(3) |
| C00C C005 C00B | 133.4(3)   | C006 C00DC00F  | 117.7(4) |
| C005 C006 C009 | 104.5(3)   | C00C C00E C00F | 121.8(4) |
| C00DC006 C005  | 121.1(3)   | C00E C00F C00D | 120.6(4) |
| C00DC006 C009  | 134.4(3)   |                |          |

**Table 13. Torsion Angles for 1120-B\_auto.**

| A    | B    | C        | D    | Angle/°     | A    | B    | C        | D    | Angle/°   |
|------|------|----------|------|-------------|------|------|----------|------|-----------|
| I001 | C003 | C004     | C007 | -113.0(2)   | C009 | O002 | C00B     | C004 | -58.8(3)  |
| I001 | C003 | C004     | C00B | 128.5(2)    | C009 | O002 | C00B     | C005 | 52.1(3)   |
| I001 | C003 | C009     | O002 | -165.24(17) | C009 | C003 | C004     | C007 | 123.0(3)  |
| I001 | C003 | C009     | C006 | -59.4(3)    | C009 | C003 | C004     | C00B | 4.6(3)    |
| C003 | C004 | C007     | C00A | 64.4(3)     | C009 | C006 | C00DC00F |      | -178.2(3) |
| C003 | C004 | C00B     | O002 | 32.4(3)     | C00B | O002 | C009     | C003 | 61.1(2)   |
| C003 | C004 | C00B     | C005 | -73.7(3)    | C00B | O002 | C009     | C006 | -51.5(2)  |
| C004 | C003 | C009     | O002 | -40.1(3)    | C00B | C004 | C007     | C00A | 176.5(3)  |
| C004 | C003 | C009     | C006 | 65.7(3)     | C00B | C005 | C006     | C009 | 0.8(3)    |
| C005 | C006 | C009     | O002 | 32.3(3)     | C00B | C005 | C006     | C00D | -177.7(3) |
| C005 | C006 | C009     | C003 | -71.7(3)    | C00B | C005 | C00C     | C00E | 177.5(3)  |
| C005 | C006 | C00DC00F |      | -0.3(5)     | C00C | C005 | C006     | C009 | 178.0(3)  |
| C005 | C00C | C00E     | C00F | -1.1(5)     | C00C | C005 | C006     | C00D | -0.4(4)   |
| C006 | C005 | C00B     | O002 | -33.5(3)    | C00C | C005 | C00B     | O002 | 149.7(3)  |
| C006 | C005 | C00B     | C004 | 72.3(3)     | C00C | C005 | C00B     | C004 | -104.4(4) |
| C006 | C005 | C00C     | C00E | 1.1(4)      | C00C | C00E | C00F     | C00D | 0.4(6)    |

|                   |          |                    |           |
|-------------------|----------|--------------------|-----------|
| C006C00DC00F C00E | 0.3(5)   | C00DC006 C009 O002 | -149.5(3) |
| C007C004 C00BO002 | -87.4(3) | C00DC006 C009 C003 | 106.5(4)  |
| C007C004 C00BC005 | 166.6(2) |                    |           |

**Table 14. Hydrogen Atom Coordinates ( $\text{\AA} \times 10^4$ ) and Isotropic Displacement Parameters ( $\text{\AA}^2 \times 10^3$ ) for 1120-B<sub>auto</sub>.**

| Atom | x       | y       | z       | U(eq) |
|------|---------|---------|---------|-------|
| H003 | 8557.44 | 3696.07 | 3851.52 | 42    |
| H004 | 7806.07 | 6154.22 | 2166.39 | 38    |
| H00A | 9474.24 | 6557.59 | 2025.65 | 48    |
| H00B | 9796.46 | 5328.46 | 3209.16 | 48    |
| H009 | 7945.95 | 4304.42 | 5950.44 | 48    |
| H00C | 8892.93 | 7867.11 | 4082.47 | 44    |
| H00D | 7118.92 | 9559.7  | 3614.58 | 53    |
| H00E | 5976.68 | 5356.88 | 5794.97 | 62    |
| H00F | 5581.04 | 9572.63 | 4180.55 | 69    |
| H00G | 5003.58 | 7520.83 | 5234.23 | 69    |

Datablock 1120-b<sub>auto</sub> - ellipsoid plot

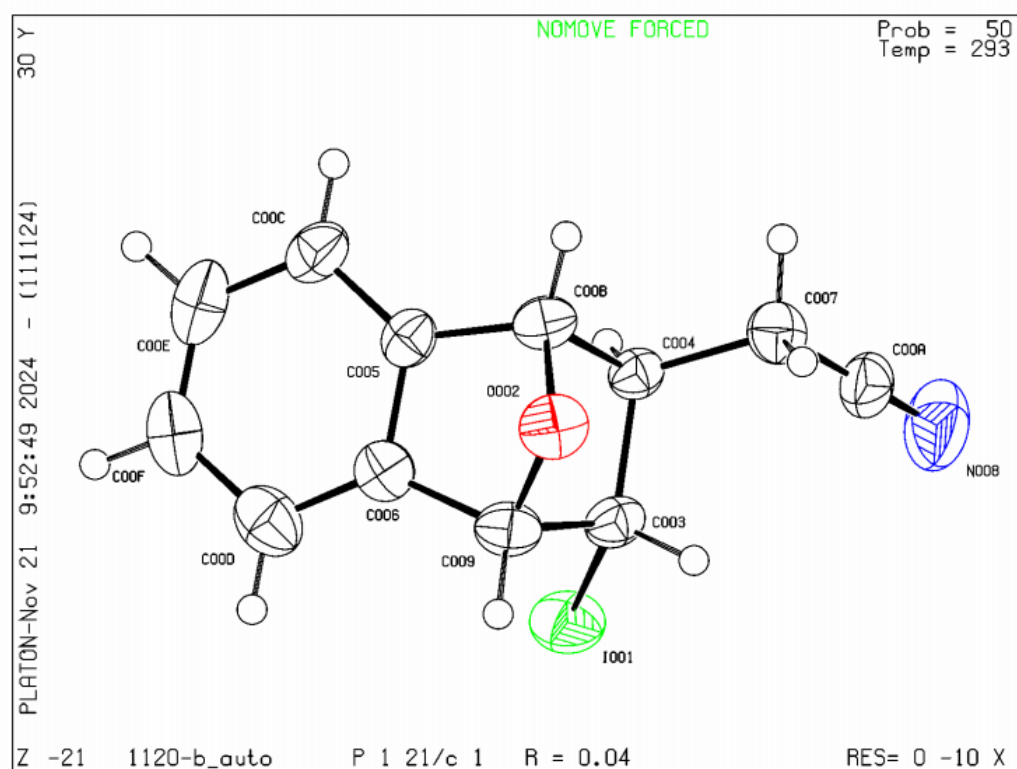



## 7. DFT calculation

### Computational methods

All density functional theory (DFT) calculations were performed to understand the origin of the enantioselectivity. B3LYP-D3<sup>[3]</sup> method combined with a Def2-SVP basis set<sup>[4]</sup> for all atoms were used to fully optimize all structures in the gas-phase. Then, vibrational frequency calculations on these optimized geometries were carried out at the same level of theory to confirm no imaginary frequency for all local minimum, and one appropriate imaginary frequency for each transition state. To obtain higher accurate energies, the Def2-TZVP basis set was also used for the single-point energy calculations in PCM solvent model<sup>[5]</sup> using CH<sub>3</sub>CN solution. The single-point energy calculations are also performed using basis sets (Def2-TZVP) for all atoms to obtain more accurate electronic energies. To examine the effect of DFT functional, a few other common and reliable M06-2X, PBE0-D3, and B97X-D methods<sup>[6]</sup> were also used for the single-point energy calculations on the key intermediates and transition states in CH<sub>3</sub>CN solution. All DFT calculations were carried out by Gaussian16 program.<sup>[7]</sup> All 3D images of the optimized structures were shown by CYLview.<sup>[8]</sup> All free energies are corrected with Grimme's quasi-harmonic approximation for vibrational entropy correction at all frequencies below than 100 cm<sup>-1</sup> by GoodVibes using default settings.<sup>[9]</sup> The steric maps were generated by SambVca 2.0 program.<sup>[10]</sup> The distance of the coordination point from the center of the sphere is defined as 2.2 Angstrom, and the value of mesh spacing for numbering integration is defined as 0.050. Other default parameters are used.

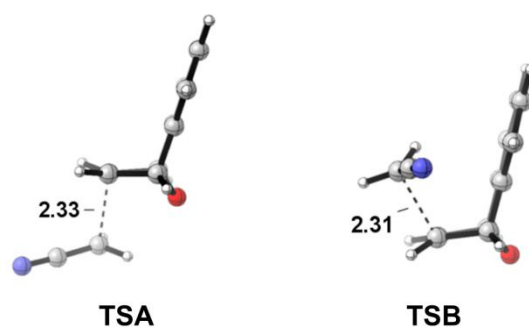

**Figure 15.** 3D geometrical structures for TSA and TSB with bond distances (Å).

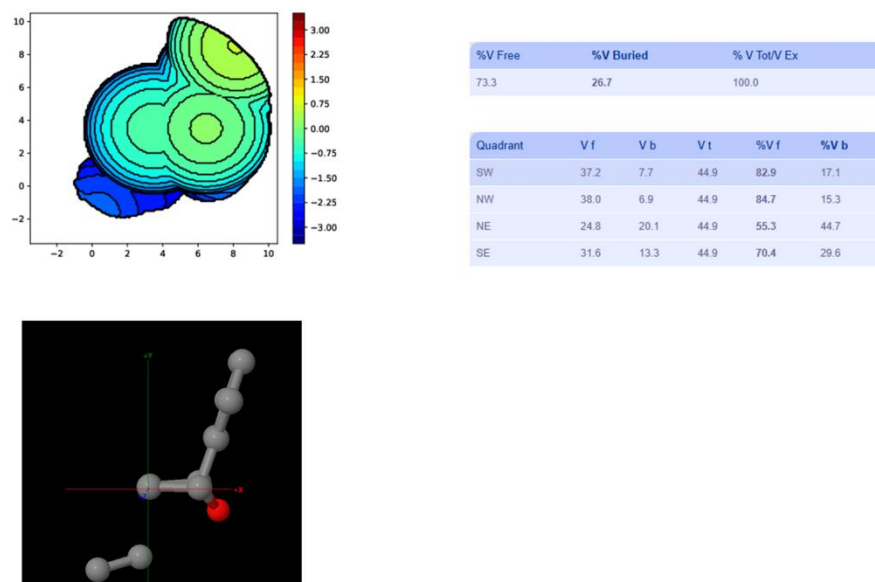

**Figure 16.** Steric map of Mn-ligand part and substrate for **TSA** with the computed buried volumes (in %).

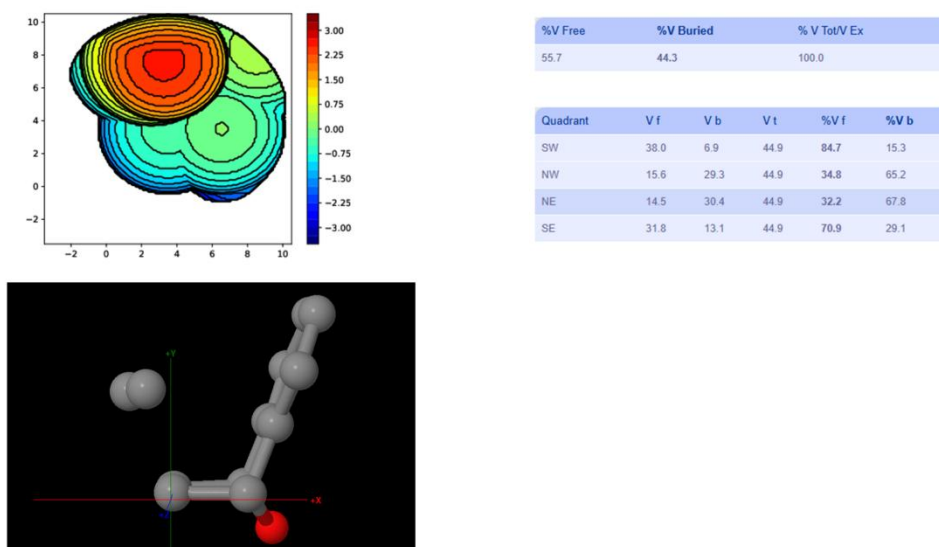

**Figure 17.** Steric map of Mn-ligand part and substrate for **TSB** with the computed buried volumes (in %).

**Table 15.** The relative corrected free energies (in kcal/mol) of transition states (**TSA** and **TSB**) in CH<sub>3</sub>CN solution evaluated by the other PCM DFTs/Def2-TZVP methods based on the B3LYP-D3/Def2-SVP-optimized structures in gas-phase.

|            | <b>DG<sub>soln</sub></b><br><b>(B3LYP-D3)</b> | <b>DG<sub>soln</sub></b><br><b>(M06-2X)</b> | <b>DG<sub>soln</sub></b><br><b>(PBE0-D3)</b> | <b>DG<sub>soln</sub></b><br><b>(wB97X-D)</b> |
|------------|-----------------------------------------------|---------------------------------------------|----------------------------------------------|----------------------------------------------|
| <b>Sub</b> | 0.0                                           | 0.0                                         | 0.0                                          | 0.0                                          |
| <b>TSA</b> | 14.5                                          | 16.8                                        | 13.7                                         | 16.2                                         |
| <b>TSB</b> | 17.4                                          | 19.2                                        | 16.6                                         | 18.8                                         |
| <b>DDG</b> | 2.9                                           | 2.5                                         | 2.9                                          | 2.6                                          |

**Table 16.** The absolute electronic and corrected free energies (in Hartree) of the optimized structures of intermediates and transition states by the B3LYP-D3 method in gas-phase. The free energies (G-qh) are corrected with the quasi-harmonic entropy correction.

|                         | <b>E<sub>gas</sub></b> | <b>G<sub>gas-qh</sub></b> |
|-------------------------|------------------------|---------------------------|
| <b>CH<sub>2</sub>CN</b> | -131.99585             | -131.98929                |
| <b>Sub</b>              | -460.71165             | -460.59169                |
| <b>TSA</b>              | -592.70894             | -592.56146                |
| <b>TSB</b>              | -592.70579             | -592.55748                |

**Table 17.** The absolute electronic energies (in Hartree) for transition states (**TSA** and **TSB**) evaluated by the other PCM(CH<sub>3</sub>CN) DFTs/def2-TZVP methods based on the B3LYP-D3/def2-SVP-optimized structures in gas-phase.

|                | <b>E<sub>soln</sub></b><br><b>(B3LYP-D3)</b> | <b>E<sub>soln</sub></b><br><b>(M06-2X)</b> | <b>E<sub>soln</sub></b><br><b>(PBE0-D3)</b> | <b>E<sub>soln</sub></b><br><b>(wB97X-D)</b> |
|----------------|----------------------------------------------|--------------------------------------------|---------------------------------------------|---------------------------------------------|
| <b>Sub</b>     | -132.15616                                   | -132.09032                                 | -131.98954                                  | -132.09847                                  |
| <b>Mn6-fac</b> | -461.22161                                   | -461.02134                                 | -460.67880                                  | -461.04950                                  |
| <b>6TS-R</b>   | -593.37562                                   | -593.10593                                 | -592.66740                                  | -593.14307                                  |
| <b>6TS-S</b>   | -593.37190                                   | -593.10281                                 | -592.66363                                  | -593.13976                                  |

### Cartesian coordinates XYZs

|                        |           |           |           |   |           |           |           |
|------------------------|-----------|-----------|-----------|---|-----------|-----------|-----------|
| CH <sub>2</sub> CN.xyz |           |           |           | H | -2.326403 | 1.356125  | -1.728835 |
| C                      | 0.000712  | 1.197239  | 0.000000  | C | -1.987079 | -0.668696 | -0.954245 |
| H                      | 0.000557  | 1.746584  | 0.944438  | H | -2.326708 | -1.356415 | -1.728487 |
| H                      | 0.000557  | 1.746584  | -0.944438 | H | -1.494009 | 2.054161  | 0.779455  |
| C                      | 0.000000  | -0.188913 | 0.000000  | H | -1.493975 | -2.053925 | 0.779937  |
| N                      | -0.000770 | -1.363303 | 0.000000  | C | 0.215630  | -0.703878 | 0.161519  |
| Sub.xyz                |           |           |           | C | 1.385174  | -1.421850 | -0.003126 |
| C                      | -1.267419 | 1.069643  | 0.352384  | C | 0.215690  | 0.703988  | 0.161511  |
| C                      | -1.267460 | -1.069509 | 0.352592  | C | 2.586618  | -0.697421 | -0.164134 |
| C                      | -1.986973 | 0.668471  | -0.954444 | H | 1.391674  | -2.515181 | -0.002617 |
|                        |           |           |           | C | 1.385309  | 1.421827  | -0.003156 |

|         |           |           |           |   |           |           |           |
|---------|-----------|-----------|-----------|---|-----------|-----------|-----------|
| C       | 2.586682  | 0.697268  | -0.164141 | C | -2.334741 | -1.750139 | -0.517797 |
| H       | 3.529044  | -1.237706 | -0.285708 | H | -3.122727 | 0.090503  | -1.379766 |
| H       | 1.391926  | 2.515157  | -0.002702 | C | -0.357248 | -1.544095 | 0.901565  |
| H       | 3.529159  | 1.237461  | -0.285720 | C | -1.357184 | -2.330567 | 0.294390  |
| O       | -1.674718 | 0.000159  | 1.220764  | H | -3.100347 | -2.381407 | -0.976059 |
| TSA.xyz |           |           |           | H | 0.424129  | -2.002841 | 1.510701  |
| C       | -0.024506 | -1.220371 | 0.684974  | H | -1.365744 | -3.410635 | 0.460885  |
| C       | 0.201289  | 0.912527  | 0.571173  | O | -0.502765 | 2.026938  | 1.225784  |
| C       | 0.898944  | -0.987083 | -0.517837 | C | 1.890356  | -0.379285 | -1.372141 |
| H       | 1.236374  | -1.744432 | -1.224268 | H | 0.898603  | -0.748809 | -1.636578 |
| C       | 1.098266  | 0.366592  | -0.565778 | H | 2.458189  | 0.135681  | -2.150350 |
| H       | 1.420517  | 0.940164  | -1.434548 | C | 2.610865  | -1.092810 | -0.397736 |
| H       | 0.028462  | -2.187138 | 1.199603  | N | 3.180716  | -1.632197 | 0.468802  |
| H       | 0.452490  | 1.896646  | 0.984251  |   |           |           |           |
| C       | -1.255013 | 0.671582  | 0.152321  |   |           |           |           |
| C       | -2.296115 | 1.486327  | -0.253489 |   |           |           |           |
| C       | -1.408183 | -0.725643 | 0.232979  |   |           |           |           |
| C       | -3.523263 | 0.871642  | -0.581361 |   |           |           |           |
| H       | -2.184015 | 2.571943  | -0.315603 |   |           |           |           |
| C       | -2.603749 | -1.338049 | -0.097493 |   |           |           |           |
| C       | -3.673804 | -0.513741 | -0.504847 |   |           |           |           |
| H       | -4.367787 | 1.489798  | -0.896178 |   |           |           |           |
| H       | -2.727652 | -2.422574 | -0.040090 |   |           |           |           |
| H       | -4.635109 | -0.966881 | -0.759947 |   |           |           |           |
| O       | 0.364623  | -0.131502 | 1.545123  |   |           |           |           |
| C       | 3.147482  | 0.775802  | 0.460299  |   |           |           |           |
| H       | 2.814073  | 0.309483  | 1.388583  |   |           |           |           |
| H       | 3.099769  | 1.865948  | 0.396037  |   |           |           |           |
| C       | 4.101847  | 0.113502  | -0.330518 |   |           |           |           |
| N       | 4.852389  | -0.454209 | -1.023051 |   |           |           |           |
| TSB.xyz |           |           |           |   |           |           |           |
| C       | 0.498370  | 1.000334  | 1.088669  |   |           |           |           |
| C       | -1.037287 | 1.902419  | -0.107234 |   |           |           |           |
| C       | 1.240442  | 1.500828  | -0.189799 |   |           |           |           |
| H       | 2.305574  | 1.723389  | -0.220199 |   |           |           |           |
| C       | 0.249056  | 2.102770  | -0.922594 |   |           |           |           |
| H       | 0.328113  | 2.617689  | -1.879785 |   |           |           |           |
| H       | 1.103533  | 0.890416  | 1.994994  |   |           |           |           |
| H       | -1.854499 | 2.610257  | -0.290977 |   |           |           |           |
| C       | -1.379971 | 0.408842  | -0.128871 |   |           |           |           |
| C       | -2.353548 | -0.359175 | -0.746263 |   |           |           |           |
| C       | -0.388728 | -0.178182 | 0.677686  |   |           |           |           |

## 8. Characterization data of products

### 2-((1*S*,2*R*,3*R*,4*S*)-3-bromo-1,2,3,4-tetrahydro-1,4-epoxynaphthalen-2-yl)acetonitrile (**3aa-cis**)

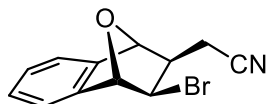

72% yield, white solid,  $^1\text{H}$  NMR (400 MHz,  $\text{CDCl}_3$ )  $\delta$  7.33 – 7.31 (m, 2H), 7.25 – 7.21 (m, 2H), 5.45 (s, 1H), 5.29 (s, 1H), 4.13 (d,  $J = 7.1$  Hz, 1H), 2.76 – 2.73 (m, 2H), 2.34 (dt,  $J = 9.0, 7.0$  Hz, 1H).

$^{13}\text{C}$  NMR (101 MHz,  $\text{CDCl}_3$ )  $\delta$  144.0, 142.0, 128.4, 127.9, 120.4, 119.9, 119.1, 88.0, 83.1, 51.6, 41.3, 22.9.

MP: 132°C

HRMS ( $\text{ESI}^+$ )  $m/z$ :  $[\text{M} + \text{H}]^+$  Calcd for  $\text{C}_{12}\text{H}_{10}\text{BrNO}$  264.0019; Found 264.0013.

### 2-((1*S*,2*R*,3*S*,4*S*)-3-bromo-1,2,3,4-tetrahydro-1,4-epoxynaphthalen-2-yl)acetonitrile (**3aa-trans**)

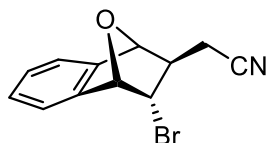

9% yield, white solid,  $^1\text{H}$  NMR (600 MHz,  $\text{CDCl}_3$ )  $\delta$  7.42 – 7.40 (m, 1H), 7.36 – 7.33 (m, 1H), 7.29 (dd,  $J = 5.4, 3.1$  Hz, 2H), 5.41 (d,  $J = 4.6$  Hz, 1H), 5.19 (s, 1H), 3.91 (dd,  $J = 4.6, 3.3$  Hz, 1H), 2.76 (dd,  $J = 16.6, 6.7$  Hz, 1H), 2.68 (dd,  $J = 16.7, 8.9$  Hz, 1H), 2.17 (ddd,  $J = 8.9, 6.5, 3.3$  Hz, 1H).

$^{13}\text{C}$  NMR (151 MHz,  $\text{CDCl}_3$ )  $\delta$  143.2, 141.1, 128.1, 127.1, 123.1, 119.2, 117.6, 82.9, 82.8, 48.3, 46.3, 20.8.

MP: 95°C

HRMS ( $\text{ESI}^+$ )  $m/z$ :  $[\text{M} + \text{H}]^+$  Calcd for  $\text{C}_{12}\text{H}_{10}\text{BrNO}$  264.0019; Found 264.0018.

### 1-((1*S*,2*R*,3*R*,4*S*)-3-bromo-1,2,3,4-tetrahydro-1,4-epoxynaphthalen-2-yl)cyclopropane-1-carbonitrile (**3ab-cis**)

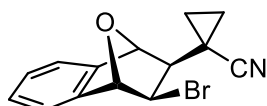

29% yield, white solid,  $^1\text{H}$  NMR (400 MHz,  $\text{CDCl}_3$ )  $\delta$  7.43 – 7.40 (m, 1H), 7.29 – 7.26 (m, 3H), 5.45 (d,  $J = 4.6$  Hz, 1H), 5.31 (s, 1H), 4.29 (t,  $J = 4.3$  Hz, 1H), 1.49 (d,  $J = 3.9$  Hz, 1H), 1.46 – 1.37 (m, 2H), 1.22 – 1.15 (m, 1H), 1.08 – 1.00 (m, 1H).

$^{13}\text{C}$  NMR (101 MHz,  $\text{CDCl}_3$ )  $\delta$  144.1, 141.5, 127.9, 127.1, 123.3, 121.7, 118.7, 82.9, 82.3, 56.4, 45.2, 13.6, 13.1, 11.9.

MP: 102°C

HRMS ( $\text{ESI}^+$ )  $m/z$ :  $[\text{M} + \text{H}]^+$  Calcd for  $\text{C}_{14}\text{H}_{12}\text{BrNO}$  290.0175; Found 290.0184.

### (1*S*,2*R*,3*R*,4*S*)-2-bromo-3-(nitromethyl)-1,2,3,4-tetrahydro-1,4-epoxynaphthalene (**3ac-cis**)

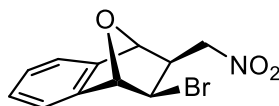

62% yield, white solid,  $^1\text{H}$  NMR (400 MHz,  $\text{CDCl}_3$ )  $\delta$  7.37 – 7.34 (m, 1H), 7.33 – 7.31 (m, 1H), 7.27 (d,  $J = 2.4$  Hz, 1H), 7.26 – 7.24 (m, 1H), 5.50 (s, 1H), 5.29 (s, 1H), 4.82 (dd,  $J = 14.3, 5.5$  Hz, 1H), 4.68 (dd,  $J = 14.3, 9.6$  Hz, 1H), 4.21 (d,  $J = 7.3$  Hz, 1H), 2.84 (ddd,  $J = 9.7, 7.3, 5.5$  Hz, 1H).

$^{13}\text{C}$  NMR (101 MHz,  $\text{CDCl}_3$ )  $\delta$  144.0, 141.7, 128.5, 127.9, 120.5, 119.8, 87.7, 81.9, 78.4, 50.0, 42.0.

MP: 132°C

HRMS ( $\text{ESI}^+$ )  $m/z$ :  $[\text{M} + \text{H}]^+$  Calcd for  $\text{C}_{11}\text{H}_{10}\text{BrNO}_3$  283.9917; Found 283.9921.

**ethyl 2-((1*S*,2*R*,3*R*,4*S*)-3-bromo-1,2,3,4-tetrahydro-1,4-epoxynaphthalen-2-yl)acetate (3ad-*cis*)**

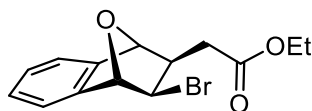

43% yield, light yellow oil,  $^1\text{H}$  NMR (400 MHz,  $\text{CDCl}_3$ )  $\delta$  7.33 – 7.28 (m, 2H), 7.24 – 7.18 (m, 2H), 5.45 (s, 1H), 5.16 (s, 1H), 4.21 – 4.16 (m, 3H), 2.86 (dd,  $J = 17.3, 6.6$  Hz, 1H), 2.74 (dd,  $J = 17.2, 9.0$  Hz, 1H), 2.46 (dt,  $J = 8.9, 6.9$  Hz, 1H), 1.29 (t,  $J = 7.1$  Hz, 3H).

$^{13}\text{C}$  NMR (101 MHz,  $\text{CDCl}_3$ )  $\delta$  172.6, 145.6, 142.0, 128.0, 127.3, 120.4, 119.4, 87.8, 83.8, 60.8, 53.4, 40.6, 38.9, 14.3.

HRMS ( $\text{ESI}^+$ )  $m/z$ :  $[\text{M} + \text{H}]^+$  Calcd for  $\text{C}_{14}\text{H}_{15}\text{BrO}_3$  311.0277; Found 311.0284.

**ethyl (*S*)-2-((1*S*,2*S*,3*R*,4*S*)-3-bromo-1,2,3,4-tetrahydro-1,4-epoxynaphthalen-2-yl)-2-fluoroacetate (3ae-*cis*)**

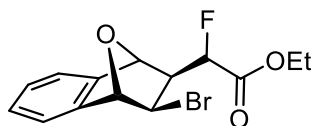

33% yield, white oil,  $^1\text{H}$  NMR (400 MHz,  $\text{CDCl}_3$ )  $\delta$  7.29 (dd,  $J = 6.9, 1.5$  Hz, 1H), 7.24 – 7.15 (m, 3H), 5.49 (s, 1H), 5.45 (d,  $J = 2.1$  Hz, 1H), 5.06 (dd,  $J = 46.9, 9.0$  Hz, 1H), 4.22 (tdq,  $J = 10.4, 6.5, 3.7$  Hz, 2H), 4.08 (d,  $J = 7.3$  Hz, 1H), 2.61 (ddd,  $J = 12.7, 9.0, 7.3$  Hz, 1H), 1.27 (t,  $J = 7.1$  Hz, 3H).

$^{13}\text{C}$  NMR (101 MHz,  $\text{CDCl}_3$ )  $\delta$  168.0 (d,  $J = 22.0$  Hz), 144.9, 142.0, 128.3, 127.6, 120.6, 119.5, 91.3 (d,  $J = 177.1$  Hz), 87.5, 80.2 (d,  $J = 5.7$  Hz), 62.1, 49.0 (d,  $J = 6.1$  Hz), 45.8 (d,  $J = 23.2$  Hz), 14.0.

$^{19}\text{F}$  NMR (376 MHz,  $\text{CDCl}_3$ )  $\delta$  -186.72.

HRMS ( $\text{ESI}^+$ )  $m/z$ :  $[\text{M} + \text{H}]^+$  Calcd for  $\text{C}_{14}\text{H}_{14}\text{BrFO}_3$  329.0183; Found 329.0175.

**ethyl 2-((1*S*,2*S*,3*R*,4*S*)-3-bromo-1,2,3,4-tetrahydro-1,4-epoxynaphthalen-2-yl)-2,2-difluoroacetate (3af-*cis*)**

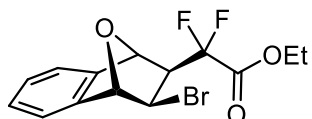

44% yield, white oil,  $^1\text{H}$  NMR (400 MHz,  $\text{CDCl}_3$ )  $\delta$  7.43 (dd,  $J = 5.7, 2.8$  Hz, 1H), 7.37 – 7.28 (m, 3H), 5.56 (s, 1H), 5.40 (d,  $J = 4.6$  Hz, 1H), 4.48 (t,  $J = 4.4$  Hz, 1H), 4.38 (q,  $J = 7.1$  Hz, 2H), 2.49 (ddd,  $J = 16.4, 9.9, 4.1$  Hz, 1H), 1.38 (t,  $J = 7.1$  Hz, 3H).

$^{13}\text{C}$  NMR (101 MHz,  $\text{CDCl}_3$ )  $\delta$  163.2 (t,  $J = 32.0$  Hz), 143.2, 141.8, 128.2, 127.3, 123.3, 119.0, 115.1 (dd,  $J = 255.6, 253.3$  Hz), 82.0, 79.5 (dd,  $J = 5.1, 2.3$  Hz), 63.6, 56.2 (t,  $J = 24.0$  Hz), 40.2 (t,  $J = 3.0$  Hz), 14.0.

$^{19}\text{F}$  NMR (376 MHz,  $\text{CDCl}_3$ )  $\delta$  -107.49 (d,  $J$  = 256.0 Hz), -109.47 (d,  $J$  = 255.7 Hz).

HRMS (ESI $^+$ )  $m/z$ :  $[\text{M} + \text{H}]^+$  Calcd for  $\text{C}_{14}\text{H}_{13}\text{BrF}_2\text{O}_3$  347.0089; Found 347.0090.

**diethyl 2-((1*S*,2*R*,3*R*,4*S*)-3-bromo-1,2,3,4-tetrahydro-1,4-epoxynaphthalen-2-yl)malonate (3ag-*cis*)**

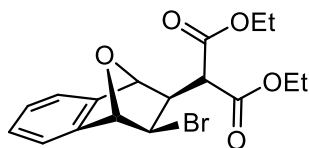

66% yield, white oil,  $^1\text{H}$  NMR (400 MHz,  $\text{CDCl}_3$ )  $\delta$  7.30 – 7.27 (m, 1H), 7.21 – 7.15 (m, 3H), 5.43 (s, 1H), 5.11 (s, 1H), 4.30 – 4.21 (m, 3H), 4.15 (qd,  $J$  = 7.2, 1.5 Hz, 2H), 3.88 (d,  $J$  = 12.1 Hz, 1H), 2.74 (dd,  $J$  = 12.1, 6.9 Hz, 1H), 1.30 (t,  $J$  = 7.1 Hz, 3H), 1.22 (t,  $J$  = 7.1 Hz, 3H).

$^{13}\text{C}$  NMR (101 MHz,  $\text{CDCl}_3$ )  $\delta$  168.8, 168.2, 145.8, 141.5, 128.2, 127.5, 120.7, 119.2, 87.8, 81.8, 62.1, 61.9, 56.2, 53.0, 45.0, 14.2, 14.0.

HRMS (ESI $^+$ )  $m/z$ :  $[\text{M} + \text{H}]^+$  Calcd for  $\text{C}_{17}\text{H}_{19}\text{BrO}_5$  383.0489; Found 383.0480.

**(1*S*,2*R*,3*R*,4*S*)-2-bromo-3-(tribromomethyl)-1,2,3,4-tetrahydro-1,4-epoxynaphthalene (3ah-*cis*)**

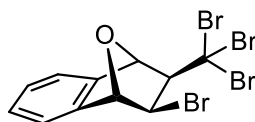

65% yield, yellow oil,  $^1\text{H}$  NMR (400 MHz,  $\text{CDCl}_3$ )  $\delta$  7.48 – 7.44 (m, 1H), 7.41 (dd,  $J$  = 6.0, 2.5 Hz, 1H), 7.33 – 7.30 (m, 2H), 5.56 (d,  $J$  = 4.6 Hz, 1H), 5.49 (s, 1H), 4.31 (t,  $J$  = 4.5 Hz, 1H), 3.23 (d,  $J$  = 4.3 Hz, 1H).

$^{13}\text{C}$  NMR (151 MHz,  $\text{CDCl}_3$ )  $\delta$  143.5, 142.4, 128.1, 127.2, 123.6, 118.8, 84.0, 83.5, 73.3, 46.4, 40.0.

HRMS (ESI $^+$ )  $m/z$ :  $[\text{M} + \text{H}]^+$  Calcd for  $\text{C}_{11}\text{H}_8\text{Br}_4\text{O}$  472.7381; Found 472.7376.

**(1*S*,2*R*,3*S*,4*S*)-2-bromo-3-(trichloromethyl)-1,2,3,4-tetrahydro-1,4-epoxynaphthalene (3ai-*cis*)**

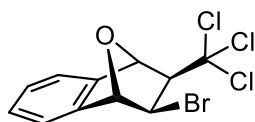

88% yield, light yellow oil,  $^1\text{H}$  NMR (400 MHz,  $\text{CDCl}_3$ )  $\delta$  7.48 – 7.44 (m, 1H), 7.39 (dd,  $J$  = 6.0, 2.5 Hz, 1H), 7.33 – 7.30 (m, 2H), 5.54 (s, 1H), 5.49 (d,  $J$  = 4.6 Hz, 1H), 4.45 (t,  $J$  = 4.5 Hz, 1H), 3.02 (d,  $J$  = 4.3 Hz, 1H).

$^{13}\text{C}$  NMR (101 MHz,  $\text{CDCl}_3$ )  $\delta$  143.7, 142.3, 128.2, 127.3, 123.6, 118.9, 99.2, 83.1, 82.5, 71.2, 44.5.

HRMS (ESI $^+$ )  $m/z$ :  $[\text{M} + \text{H}]^+$  Calcd for  $\text{C}_{11}\text{H}_8\text{BrCl}_3\text{O}$  340.8897; Found 340.8888.

**6a,7,12,12a-tetrahydro-7,12-epoxytetraphen-5(6H)-one (3aj')**

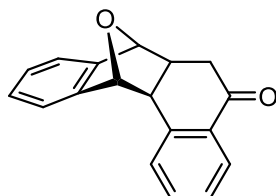

75% yield, yellow solid,  $^1\text{H}$  NMR (400 MHz,  $\text{CDCl}_3$ )  $\delta$  7.85 (dd,  $J = 7.8, 1.4$  Hz, 1H), 7.60 (td,  $J = 7.5, 1.5$  Hz, 1H), 7.48 (d,  $J = 7.7$  Hz, 1H), 7.41 – 7.31 (m, 3H), 7.25 – 7.20 (m, 2H), 5.19 (s, 1H), 5.00 (s, 1H), 3.26 (d,  $J = 7.8$  Hz, 1H), 2.94 (dd,  $J = 15.3, 2.9$  Hz, 1H), 2.83 (dd,  $J = 15.3, 8.3$  Hz, 1H), 2.54 (td,  $J = 8.1, 2.9$  Hz, 1H).

$^{13}\text{C}$  NMR (101 MHz,  $\text{CDCl}_3$ )  $\delta$  198.2, 145.1, 144.4, 143.0, 134.7, 133.6, 129.1, 127.3, 127.3, 126.9, 125.8, 119.4, 119.4, 87.8, 86.4, 43.9, 42.2, 37.7.

MP: 61°C

HRMS (ESI<sup>+</sup>)  $m/z$ :  $[\text{M} + \text{Na}]^+$  Calcd for  $\text{C}_{18}\text{H}_{14}\text{O}_2$  285.0886; Found 4285.0894.

**(1*S*,2*R*,3*S*,4*S*)-2-bromo-6,7-dimethoxy-3-(trichloromethyl)-1,2,3,4-tetrahydro-1,4-epoxynaphthalene (3bi-*cis*)**

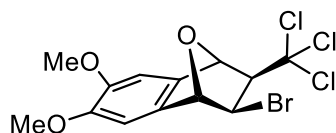

87% yield, yellow solid,  $^1\text{H}$  NMR (400 MHz,  $\text{CDCl}_3$ )  $\delta$  7.02 (s, 1H), 6.94 (s, 1H), 5.45 – 5.41 (m, 2H), 4.41 (t,  $J = 4.3$  Hz, 1H), 3.91 (s, 6H), 2.96 (d,  $J = 4.2$  Hz, 1H).

$^{13}\text{C}$  NMR (101 MHz,  $\text{CDCl}_3$ )  $\delta$  149.1, 148.3, 136.0, 134.6, 107.7, 102.9, 99.3, 83.3, 82.7, 71.5, 56.4, 56.3, 45.4.

MP: 118°C

HRMS (ESI<sup>+</sup>)  $m/z$ :  $[\text{M} + \text{Na}]^+$  Calcd for  $\text{C}_{13}\text{H}_{12}\text{BrCl}_3\text{O}_3$  422.8928; Found 422.8920.

**(1*S*,2*R*,3*S*,4*S*)-2-bromo-6,7-dimethyl-3-(trichloromethyl)-1,2,3,4-tetrahydro-1,4-epoxynaphthalene (3ci-*cis*)**

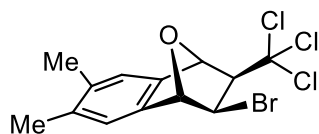

86% yield, yellow solid,  $^1\text{H}$  NMR (400 MHz,  $\text{CDCl}_3$ )  $\delta$  7.22 (s, 1H), 7.16 (s, 1H), 5.46 (s, 1H), 5.42 (d,  $J = 4.5$  Hz, 1H), 4.42 (t,  $J = 4.4$  Hz, 1H), 2.99 (d,  $J = 4.3$  Hz, 1H), 2.30 (s, 6H).

$^{13}\text{C}$  NMR (101 MHz,  $\text{CDCl}_3$ )  $\delta$  141.5, 139.9, 136.5, 135.6, 124.7, 120.1, 99.4, 83.0, 82.4, 71.5, 45.1, 20.2.

MP: 114°C

HRMS (ESI<sup>+</sup>)  $m/z$ :  $[\text{M} + \text{H}]^+$  Calcd for  $\text{C}_{13}\text{H}_{12}\text{BrCl}_3\text{O}$  368.9210; Found 368.9217.

**(1*S*,2*R*,3*S*,4*S*)-2-bromo-6,7-difluoro-3-(trichloromethyl)-1,2,3,4-tetrahydro-1,4-epoxynaphthalene (3di-*cis*)**

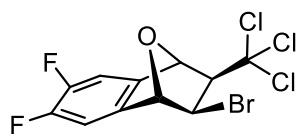

71% yield, white solid,  $^1\text{H}$  NMR (400 MHz,  $\text{CDCl}_3$ )  $\delta$  7.00 – 6.97 (m, 2H), 5.77 – 5.74 (m, 2H), 4.45 (t,  $J = 4.4$  Hz, 1H), 3.11 (d,  $J = 4.3$  Hz, 1H).



$^{13}\text{C}$  NMR (101 MHz,  $\text{CDCl}_3$ )  $\delta$  153.6 (dd,  $J = 246.9, 2.5$  Hz), 150.4 (dd,  $J = 245.6, 2.5$  Hz), 131.6 (dd,  $J = 22.3, 4.2$  Hz), 131.0 (dd,  $J = 22.3, 4.1$  Hz), 117.8 (dd,  $J = 23.6, 7.0$  Hz), 117.3 (dd,  $J = 24.1, 6.9$  Hz), 98.3, 81.3 (d,  $J = 2.8$  Hz), 79.9 (d,  $J = 1.7$  Hz), 70.7, 43.4.

$^{19}\text{F}$  NMR (376 MHz,  $\text{CDCl}_3$ )  $\delta$  -122.95 (d,  $J = 23.9$  Hz), -124.63 (d,  $J = 23.6$  Hz).

MP: 74°C

HRMS (ESI $^+$ )  $m/z$ :  $[\text{M} + \text{H}]^+$  Calcd for  $\text{C}_{11}\text{H}_6\text{BrCl}_3\text{F}_2\text{O}$  376.8708; Found 376.8715.

**(1*S*,2*R*,3*S*,4*S*)-2,6,7-tribromo-3-(trichloromethyl)-1,2,3,4-tetrahydro-1,4-epoxynaphthalene (3ei-*cis*)**

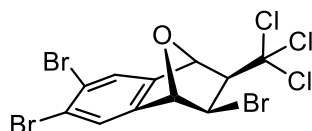

83% yield, white solid,  $^1\text{H}$  NMR (400 MHz,  $\text{CDCl}_3$ )  $\delta$  7.67 (d,  $J = 16.6$  Hz, 2H), 5.48 (s, 1H), 5.44 (d,  $J = 4.6$  Hz, 1H), 4.41 (t,  $J = 4.5$  Hz, 1H), 3.01 (d,  $J = 4.4$  Hz, 1H).

$^{13}\text{C}$  NMR (101 MHz,  $\text{CDCl}_3$ )  $\delta$  144.4, 143.3, 128.7, 124.4, 124.4, 123.7, 98.6, 82.6, 81.8, 70.8, 43.5.

MP: 109°C

HRMS (ESI $^+$ )  $m/z$ :  $[\text{M} + \text{H}]^+$  Calcd for  $\text{C}_{11}\text{H}_6\text{Br}_3\text{Cl}_3\text{O}$  496.7107; Found 496.7117.

**(1*S*,2*R*,3*S*,4*S*)-2-bromo-5,8-dimethoxy-3-(trichloromethyl)-1,2,3,4-tetrahydro-1,4-epoxynaphthalene (3fi-*cis*)**

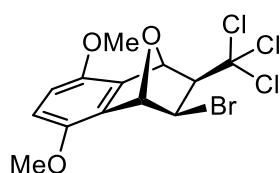

84% yield, yellow solid,  $^1\text{H}$  NMR (400 MHz,  $\text{CDCl}_3$ )  $\delta$  6.77 (d,  $J = 1.6$  Hz, 2H), 5.71 (d,  $J = 4.5$  Hz, 1H), 5.67 (s, 1H), 4.41 (t,  $J = 4.3$  Hz, 1H), 3.85 (d,  $J = 6.7$  Hz, 6H), 3.07 (d,  $J = 4.3$  Hz, 1H).

$^{13}\text{C}$  NMR (101 MHz,  $\text{CDCl}_3$ )  $\delta$  149.3, 146.1, 132.5, 131.9, 112.5, 112.2, 99.2, 81.3, 80.5, 70.9, 56.3, 56.1, 44.6.

MP: 103°C

HRMS (ESI $^+$ )  $m/z$ :  $[\text{M} + \text{H}]^+$  Calcd for  $\text{C}_{13}\text{H}_{12}\text{BrCl}_3\text{O}_3$  400.9108; Found 400.9109.

**(1*S*,2*R*,3*S*,4*S*)-2-bromo-5,8-difluoro-3-(trichloromethyl)-1,2,3,4-tetrahydro-1,4-epoxynaphthalene (3gi-*cis*)**

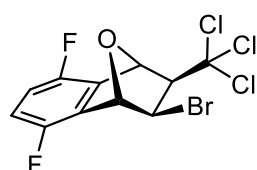

74% yield, white solid,  $^1\text{H}$  NMR (400 MHz,  $\text{CDCl}_3$ )  $\delta$  6.98 (m,  $J = 4.5$  Hz, 2H), 5.77 – 5.74 (m, 2H), 4.44 (t,  $J = 4.4$  Hz, 1H), 3.11 (d,  $J = 4.3$  Hz, 1H).

$^{13}\text{C}$  NMR (101 MHz,  $\text{CDCl}_3$ )  $\delta$  153.6 (dd,  $J = 247.0, 2.5$  Hz), 150.4 (dd,  $J = 245.6, 2.5$  Hz), 131.6 (dd,  $J = 22.3, 4.2$  Hz), 131.1 (dd,  $J = 22.3, 4.0$  Hz), 117.8 (dd,  $J = 23.6, 7.1$  Hz), 117.3 (dd,  $J = 24.2, 6.9$  Hz), 98.3, 81.3 (d,  $J = 2.8$  Hz), 79.9 (d,  $J = 1.6$  Hz), 70.7, 43.4.

$^{19}\text{F}$  NMR (376 MHz,  $\text{CDCl}_3$ )  $\delta$  -122.94 (d,  $J = 23.4$  Hz), -124.61 (d,  $J = 23.8$  Hz).

MP: 83°C

HRMS (ESI $^+$ )  $m/z$ :  $[\text{M} + \text{H}]^+$  Calcd for  $\text{C}_{11}\text{H}_6\text{BrCl}_3\text{F}_2\text{O}$  376.8708; Found 376.8706.

**(1*S*,2*R*,3*S*,4*S*)-2-bromo-1,4-dimethyl-3-(trichloromethyl)-1,2,3,4-tetrahydro-1,4-epoxynaphthalene (3hi-*cis*)**

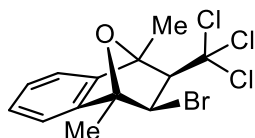

50% yield, yellow solid,  $^1\text{H}$  NMR (600 MHz,  $\text{CDCl}_3$ )  $\delta$  7.33 – 7.29 (m, 3H), 7.25 – 7.23 (m, 1H), 4.25 (d,  $J = 4.5$  Hz, 1H), 3.07 (d,  $J = 4.5$  Hz, 1H), 2.05 (s, 3H), 1.88 (s, 3H).

$^{13}\text{C}$  NMR (151 MHz,  $\text{CDCl}_3$ )  $\delta$  147.9, 145.5, 128.0, 127.2, 121.9, 117.9, 99.1, 87.3, 87.0, 72.7, 54.6, 16.4, 15.1.

MP: 119°C

HRMS (ESI $^+$ )  $m/z$ :  $[\text{M} + \text{H}]^+$  Calcd for  $\text{C}_{13}\text{H}_{12}\text{BrCl}_3\text{O}$  368.9210; Found 368.9217.

**(1*S*,2*R*,3*S*,4*S*)-2-bromo-3-(trichloromethyl)-1,2,3,4-tetrahydro-1,4-epoxyanthracene (3ii-*cis*)**

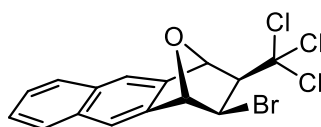

61% yield, yellow solid,  $^1\text{H}$  NMR (400 MHz,  $\text{CDCl}_3$ )  $\delta$  7.92 – 7.85 (m, 3H), 7.78 (s, 1H), 7.56 – 7.53 (m, 2H), 5.67 (s, 1H), 5.60 (d,  $J = 4.7$  Hz, 1H), 4.53 (t,  $J = 4.6$  Hz, 1H), 3.15 (d,  $J = 4.6$  Hz, 1H).

$^{13}\text{C}$  NMR (101 MHz,  $\text{CDCl}_3$ )  $\delta$  140.9, 139.1, 133.1, 132.7, 128.6, 128.4, 126.7, 126.6, 122.5, 117.6, 99.2, 83.2, 82.4, 71.7, 45.0.

MP: 117°C

HRMS (ESI $^+$ )  $m/z$ :  $[\text{M} + \text{H}]^+$  Calcd for  $\text{C}_{15}\text{H}_{10}\text{BrCl}_3\text{O}$  390.9053; Found 390.9051.

**tert-butyl (1*S*,2*R*,3*S*,4*S*)-2-bromo-6,7-dimethyl-3-(trichloromethyl)-1,2,3,4-tetrahydro-1,4-epiminonaphthalene-9-carboxylate (3ji-*cis*)**

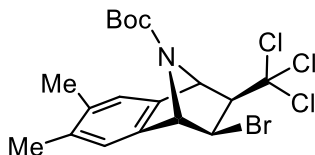

80% yield, white solid,  $^1\text{H}$  NMR (600 MHz,  $\text{CDCl}_3$ )  $\delta$  7.21 (s, 1H), 7.15 (s, 1H), 5.32 – 5.15 (m, 2H), 4.50 (t,  $J = 4.2$  Hz, 1H), 2.87 (d,  $J = 4.4$  Hz, 1H), 2.28 (s, 6H), 1.35 (s, 9H).

$^{13}\text{C}$  NMR (151 MHz,  $\text{CDCl}_3$ )  $\delta$  152.9 (d,  $J = 50.8$  Hz), 141.6 (d,  $J = 91.1$  Hz), 139.9 (d,  $J = 86.7$  Hz), 136.1, 135.1, 125.4 (d,  $J = 77.3$  Hz), 120.9 (d,  $J = 87.8$  Hz), 99.2, 81.0, 71.6 (d,  $J = 118.6$  Hz), 65.7 (d,  $J = 170.5$  Hz), 64.1 (d,  $J = 81.4$  Hz), 45.9 (d,  $J = 33.5$  Hz), 28.2, 20.1 (d,  $J = 1.8$  Hz).

MP: 140°C

HRMS (ESI<sup>+</sup>) m/z: [M + Na]<sup>+</sup> Calcd for C<sub>18</sub>H<sub>21</sub>BrCl<sub>3</sub>NO<sub>2</sub> 489.9713; Found 489.9721.

**tert-butyl (1*S*,2*R*,3*S*,4*S*)-2-bromo-6,7-difluoro-3-(trichloromethyl)-1,2,3,4-tetrahydro-1,4-epiminonaphthalene-9-carboxylate (3ki-*cis*)**

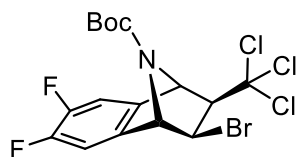

75% yield, white solid, <sup>1</sup>H NMR (400 MHz, CDCl<sub>3</sub>) δ 7.28 (dd, *J* = 8.8, 6.9 Hz, 1H), 7.22 (dd, *J* = 8.7, 6.8 Hz, 1H), 5.32 – 5.20 (m, 2H), 4.50 (t, *J* = 4.4 Hz, 1H), 2.85 (d, *J* = 4.4 Hz, 1H), 1.35 (s, 9H).

<sup>13</sup>C NMR (151 MHz, CDCl<sub>3</sub>) δ 153.0, 150.5 (dd, *J* = 76.6, 13.6 Hz), 148.8 (dd, *J* = 76.0, 13.5 Hz), 139.9 (d, *J* = 98.0 Hz), 138.7 (d, *J* = 76.3 Hz), 114.1, 110.0, 98.5, 81.8, 71.0 (d, *J* = 96.8 Hz), 65.8 (d, *J* = 123.9 Hz), 64.0, 44.8, 28.1.

<sup>19</sup>F NMR (376 MHz, CDCl<sub>3</sub>) δ -136.71 (d, *J* = 19.2 Hz), -137.94 (d, *J* = 19.1 Hz).

MP: 131°C

HRMS (ESI<sup>+</sup>) m/z: [M + Na]<sup>+</sup> Calcd for C<sub>16</sub>H<sub>15</sub>BrCl<sub>3</sub>F<sub>2</sub>NO<sub>2</sub> 497.9212; Found 497.9203.

**(1*S*,2*S*,3*S*,4*S*)-2-bromo-3-(trichloromethyl)-1,2,3,4-tetrahydro-1,4-methanonaphthalene (3li-*cis*)**

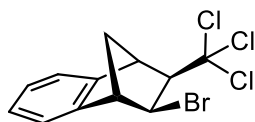

81% yield, white oil, <sup>1</sup>H NMR (400 MHz, CDCl<sub>3</sub>) δ 7.36 – 7.34 (m, 1H), 7.30 – 7.28 (m, 1H), 7.20 (dd, *J* = 5.3, 3.2 Hz, 2H), 4.55 (t, *J* = 4.4 Hz, 1H), 3.65 (d, *J* = 15.9 Hz, 2H), 2.86 (d, *J* = 5.1 Hz, 1H), 2.61 (d, *J* = 10.2 Hz, 1H), 1.99 (d, *J* = 10.3 Hz, 1H).

<sup>13</sup>C NMR (101 MHz, CDCl<sub>3</sub>) δ 147.1, 144.4, 127.2, 126.3, 124.7, 120.4, 100.6, 71.5, 52.4, 50.3, 48.5, 45.9.

HRMS (ESI<sup>+</sup>) m/z: [M + Na]<sup>+</sup> Calcd for C<sub>12</sub>H<sub>10</sub>BrCl<sub>3</sub> 360.8924; Found 360.8931.

**2-((1*S*,2*R*,3*R*,4*S*)-3-iodo-1,2,3,4-tetrahydro-1,4-epoxynaphthalen-2-yl)acetonitrile (5aa-*cis*)**

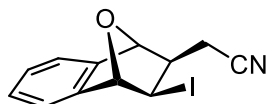

62% yield, white solid, <sup>1</sup>H NMR (400 MHz, CDCl<sub>3</sub>) δ 7.32 – 7.28 (m, 2H), 7.21 (td, *J* = 6.9, 1.2 Hz, 2H), 5.55 (s, 1H), 5.24 (s, 1H), 4.06 (d, *J* = 7.3 Hz, 1H), 2.72 – 2.69 (m, 2H), 2.05 (dt, *J* = 8.9, 7.2 Hz, 1H).

<sup>13</sup>C NMR (101 MHz, CDCl<sub>3</sub>) δ 143.5, 142.9, 128.2, 127.9, 119.9, 119.9, 119.4, 89.7, 82.9, 40.3, 29.0, 28.4.

MP: 153°C

HRMS (ESI<sup>+</sup>) m/z: [M + H]<sup>+</sup> Calcd for C<sub>12</sub>H<sub>10</sub>INO 311.9880; Found 311.9873.

**2-((1*S*,2*R*,3*S*,4*S*)-3-iodo-1,2,3,4-tetrahydro-1,4-epoxynaphthalen-2-yl)acetonitrile (5aa-*trans*)**

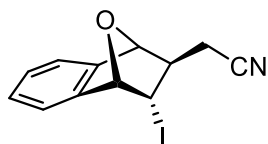

29% yield, white solid,  $^1\text{H}$  NMR (400 MHz,  $\text{CDCl}_3$ )  $\delta$  7.34 – 7.31 (m, 1H), 7.28 (dd,  $J = 7.1, 1.5$  Hz, 1H), 7.24 – 7.19 (m, 2H), 5.30 (d,  $J = 4.5$  Hz, 1H), 5.14 (s, 1H), 3.68 (t,  $J = 4.1$  Hz, 1H), 2.60 (qd,  $J = 16.8, 7.7$  Hz, 2H), 2.14 (ddd,  $J = 8.7, 6.6, 3.7$  Hz, 1H).

$^{13}\text{C}$  NMR (101 MHz,  $\text{CDCl}_3$ )  $\delta$  143.1, 142.4, 128.1, 126.9, 123.2, 119.3, 117.7, 83.9, 82.5, 49.1, 21.2, 20.6.

MP: 127°C

HRMS (ESI $^+$ )  $m/z$ :  $[\text{M} + \text{H}]^+$  Calcd for  $\text{C}_{12}\text{H}_{10}\text{INO}$  311.9880; Found 311.9890.

**ethyl 2-((1S,2R,3R,4S)-3-iodo-1,2,3,4-tetrahydro-1,4-epoxynaphthalen-2-yl)acetate (5ab-cis)**

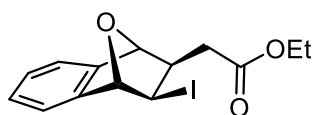

57% yield, yellow oil,  $^1\text{H}$  NMR (400 MHz,  $\text{CDCl}_3$ )  $\delta$  7.30 (d,  $J = 7.0$  Hz, 2H), 7.20 (m,  $J = 7.3$  Hz, 2H), 5.58 (s, 1H), 5.12 (s, 1H), 4.19 (dt,  $J = 12.9, 7.1$  Hz, 3H), 2.87 – 2.70 (m, 2H), 2.16 (q,  $J = 7.5$  Hz, 1H), 1.30 (t,  $J = 7.1$  Hz, 3H).

$^{13}\text{C}$  NMR (101 MHz,  $\text{CDCl}_3$ )  $\delta$  172.7, 145.1, 142.8, 127.8, 127.4, 119.9, 119.5, 89.4, 83.8, 60.8, 44.4, 39.5, 31.0, 14.3.

HRMS (ESI $^+$ )  $m/z$ :  $[\text{M} + \text{H}]^+$  Calcd for  $\text{C}_{14}\text{H}_{15}\text{IO}_3$  359.0139; Found 359.0140.

**ethyl (S)-2-fluoro-2-((1S,2S,3R,4S)-3-iodo-1,2,3,4-tetrahydro-1,4-epoxynaphthalen-2-yl)acetate (5ac-cis)**

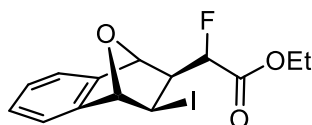

30% yield, yellow oil,  $^1\text{H}$  NMR (400 MHz,  $\text{CDCl}_3$ )  $\delta$  7.40 – 7.37 (m, 1H), 7.34 – 7.26 (m, 3H), 5.45 (s, 1H), 5.36 (dd,  $J = 4.7, 2.3$  Hz, 1H), 4.86 (dd,  $J = 48.7, 9.7$  Hz, 1H), 4.42 – 4.22 (m, 2H), 4.13 (t,  $J = 4.3$  Hz, 1H), 2.33 (td,  $J = 9.9, 4.1$  Hz, 1H), 1.37 (t,  $J = 7.2$  Hz, 3H).

$^{13}\text{C}$  NMR (101 MHz,  $\text{CDCl}_3$ )  $\delta$  168.2 (d,  $J = 24.1$  Hz), 143.0, 142.9, 128.1, 126.8, 123.0, 119.2, 88.6 (d,  $J = 187.4$  Hz), 83.6, 80.3 (d,  $J = 3.7$  Hz), 62.4, 54.6 (d,  $J = 23.1$  Hz), 16.3 (d,  $J = 6.3$  Hz), 14.2.

$^{19}\text{F}$  NMR (376 MHz,  $\text{CDCl}_3$ )  $\delta$  -185.74.

HRMS (ESI $^+$ )  $m/z$ :  $[\text{M} + \text{H}]^+$  Calcd for  $\text{C}_{14}\text{H}_{14}\text{FIO}_3$  377.0044; Found 377.0047.

**ethyl 2,2-difluoro-2-((1S,2S,3R,4S)-3-iodo-1,2,3,4-tetrahydro-1,4-epoxynaphthalen-2-yl)acetate (5ad-cis)**

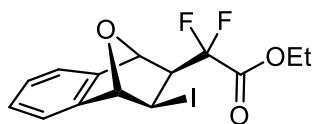

69% yield, yellow oil,  $^1\text{H}$  NMR (400 MHz,  $\text{CDCl}_3$ )  $\delta$  7.42 – 7.39 (m, 1H), 7.35 – 7.26 (m, 3H), 5.55 (s, 1H), 5.34 (d,  $J = 4.5$  Hz, 1H), 4.41 – 4.31 (m, 3H), 2.51 (ddd,  $J = 16.4, 9.6, 4.6$  Hz, 1H), 1.39 (t,  $J = 7.1$  Hz, 3H).

$^{13}\text{C}$  NMR (101 MHz,  $\text{CDCl}_3$ )  $\delta$  163.2 (t,  $J = 32.0$  Hz), 143.0, 143.0, 128.1, 126.9, 123.3, 119.0, 118.0 – 112.3 (m), 83.2, 79.1 (dd,  $J = 5.0, 2.2$  Hz), 63.6, 56.8 (t,  $J = 24.1$  Hz), 14.2 – 14.0 (m), 14.0.

$^{19}\text{F}$  NMR (376 MHz,  $\text{CDCl}_3$ )  $\delta$  -107.37 (d,  $J = 254.8$  Hz), -109.57 (d,  $J = 254.8$  Hz).

**(1*S*,2*R*,3*S*,4*S*)-2-iodo-3-(perfluorobutyl)-1,2,3,4-tetrahydro-1,4-epoxynaphthalene (5ae-*cis*)**

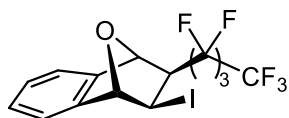

77% yield, light yellow solid,  $^1\text{H}$  NMR (400 MHz,  $\text{CDCl}_3$ )  $\delta$  7.37 (d,  $J = 7.2$  Hz, 1H), 7.25 – 7.17 (m, 3H), 5.53 (s, 1H), 5.33 (d,  $J = 4.5$  Hz, 1H), 4.24 (t,  $J = 4.7$  Hz, 1H), 2.44 (td,  $J = 15.4, 4.8$  Hz, 1H).

$^{13}\text{C}$  NMR (151 MHz,  $\text{CDCl}_3$ )  $\delta$  142.9, 142.8, 128.3, 127.2, 123.5, 119.7 (dt,  $J = 158.7, 33.0$  Hz), 118.8, 118.6 – 114.1 (m), 113.2 – 110.0 (m), 109.7 – 106.5 (m), 83.2, 79.2 (t,  $J = 4.5$  Hz), 54.1 (dd,  $J = 22.7, 19.0$  Hz), 13.5 (d,  $J = 2.8$  Hz).

$^{19}\text{F}$  NMR (376 MHz,  $\text{CDCl}_3$ )  $\delta$  -80.91 (tt,  $J = 9.7, 3.3$  Hz), -114.45 (ddp,  $J = 18.8, 10.4, 3.4$  Hz), -115.19 (tdd,  $J = 15.3, 6.4, 3.4$  Hz), -116.26 (dddq,  $J = 16.7, 12.5, 6.9, 3.5$  Hz), -117.00 (dddq,  $J = 16.1, 12.7, 6.5, 3.3$  Hz), -121.82 (pt,  $J = 9.8, 5.3$  Hz), -125.89 (dddd,  $J = 29.1, 16.5, 12.2, 4.4$  Hz).

MP: 45°C

HRMS (ESI<sup>+</sup>)  $m/z$ :  $[\text{M} + \text{Na}]^+$  Calcd for  $\text{C}_{14}\text{H}_8\text{F}_9\text{IO}$  512.9368; Found 512.9363.

**(1*S*,2*R*,3*S*,4*S*)-2-iodo-3-(perfluorohexyl)-1,2,3,4-tetrahydro-1,4-epoxynaphthalene (5af-*cis*)**

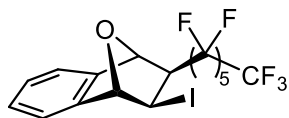

90% yield, light yellow solid,  $^1\text{H}$  NMR (400 MHz,  $\text{CDCl}_3$ )  $\delta$  7.39 – 7.33 (m, 1H), 7.25 – 7.16 (m, 3H), 5.52 (s, 1H), 5.32 (d,  $J = 4.5$  Hz, 1H), 4.23 (t,  $J = 4.7$  Hz, 1H), 2.50 – 2.37 (m, 1H).

$^{13}\text{C}$  NMR (151 MHz,  $\text{CDCl}_3$ )  $\delta$  143.0, 142.9, 128.3, 127.2, 123.6, 119.7 (dt,  $J = 112.1, 32.5$  Hz), 118.8, 119.1 – 118.5 (m), 117.9 (dt,  $J = 83.1, 32.6$  Hz), 116.6 – 114.1 (m), 113.6 – 108.0 (m), 107.2 – 106.3 (m), 83.3, 79.2 (t,  $J = 3.9$  Hz), 54.2 (dd,  $J = 22.7, 19.0$  Hz), 13.6 (d,  $J = 2.6$  Hz).

$^{19}\text{F}$  NMR (376 MHz,  $\text{CDCl}_3$ )  $\delta$  -80.85 (td,  $J = 10.1, 3.0$  Hz), -114.21 (ddq,  $J = 21.4, 13.0, 4.4$  Hz), -114.95 (ddp,  $J = 18.0, 12.9, 4.3$  Hz), -116.12 (ddt,  $J = 18.4, 14.3, 4.0$  Hz), -116.86 (ddt,  $J = 18.6, 14.3, 4.1$  Hz), -120.86 (ddq,  $J = 18.8, 10.9, 3.5$  Hz), -121.77 (tq,  $J = 22.6, 11.9, 11.1$  Hz), -122.79 (dddd,  $J = 27.2, 18.0, 13.3, 9.0$  Hz), -126.04 – -126.24 (m).

MP: 69°C

HRMS (ESI<sup>+</sup>)  $m/z$ :  $[\text{M} + \text{Na}]^+$  Calcd for  $\text{C}_{16}\text{H}_8\text{F}_{13}\text{IO}$  612.9304; Found 612.9311.

**(1*S*,2*R*,3*S*,4*S*)-2-iodo-3-(perfluorooctyl)-1,2,3,4-tetrahydro-1,4-epoxynaphthalene (5ag-*cis*)**

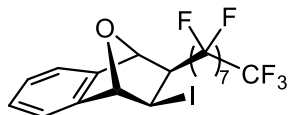

83% yield, light yellow solid,  $^1\text{H}$  NMR (400 MHz,  $\text{CDCl}_3$ )  $\delta$  7.47 – 7.44 (m, 1H), 7.36 – 7.27 (m, 3H), 5.62 (s, 1H), 5.41 (d,  $J = 4.5$  Hz, 1H), 4.32 (t,  $J = 4.6$  Hz, 1H), 2.53 (ddd,  $J = 16.4, 14.2, 4.8$  Hz, 1H).  $^{13}\text{C}$  NMR (151 MHz,  $\text{CDCl}_3$ )  $\delta$  143.0, 142.9, 128.3, 127.2, 123.6, 120.5 – 118.5 (m), 118.8, 117.9 (dt,  $J = 72.7, 32.6$  Hz), 116.8 – 113.9 (m), 113.0 (dt,  $J = 80.6, 34.1$  Hz), 112.4 – 111.0 (m), 111.0 – 109.6 (m), 109.6 – 108.0 (m), 107.3 – 106.2 (m), 83.3, 79.3 (t,  $J = 3.6$  Hz), 54.3 (dd,  $J = 22.7, 18.9$  Hz), 13.6 (d,  $J = 2.5$  Hz).  $^{19}\text{F}$  NMR (376 MHz,  $\text{CDCl}_3$ )  $\delta$  -80.92 (t,  $J = 10.0$  Hz), -114.16 – -114.31 (m), -114.98 (tt,  $J = 15.1, 4.1$  Hz), -116.15 (t,  $J = 15.7$  Hz), -116.82 – -116.97 (m), -120.83 (t,  $J = 15.7$  Hz), -121.62 (dt,  $J = 28.7, 11.9$  Hz), -121.76 – -122.10 (m), -122.81 (dt,  $J = 19.9, 10.2$  Hz), -126.24 (ddt,  $J = 18.7, 13.3, 6.4$  Hz). MP: 78°C  
HRMS (ESI $^+$ )  $m/z$ :  $[\text{M} + \text{Na}]^+$  Calcd for  $\text{C}_{18}\text{H}_8\text{F}_{17}\text{IO}$  712.9241; Found 712.9241.

**(1*S*,2*R*,3*S*,4*S*)-2-iodo-3-(trichloromethyl)-1,2,3,4-tetrahydro-1,4-epoxynaphthalene (5*ah-cis*)**

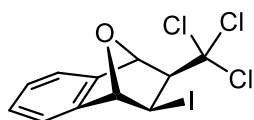

59% yield, light yellow oil,  $^1\text{H}$  NMR (400 MHz,  $\text{CDCl}_3$ )  $\delta$  7.45 – 7.42 (m, 1H), 7.39 – 7.36 (m, 1H), 7.30 (ddd,  $J = 8.5, 6.8, 1.3$  Hz, 2H), 5.53 (s, 1H), 5.43 (d,  $J = 4.5$  Hz, 1H), 4.33 (t,  $J = 4.6$  Hz, 1H), 3.03 (d,  $J = 4.8$  Hz, 1H).  $^{13}\text{C}$  NMR (101 MHz,  $\text{CDCl}_3$ )  $\delta$  143.5, 143.5, 128.1, 127.0, 123.6, 118.9, 99.6, 84.4, 81.9, 71.3, 19.1. HRMS (ESI $^+$ )  $m/z$ :  $[\text{M} + \text{H}]^+$  Calcd for  $\text{C}_{11}\text{H}_8\text{Cl}_3\text{IO}$  388.8758; Found 388.8753.

**2-((1*S*,2*R*,3*R*,4*S*)-3-bromo-1,2,3,4-tetrahydro-1,4-epoxynaphthalen-2-yl)acetamide (7)**

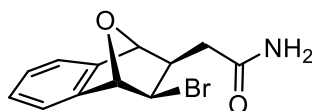

92% yield, white solid,  $^1\text{H}$  NMR (600 MHz, MeOD)  $\delta$  7.39 – 7.35 (m, 1H), 7.32 – 7.28 (m, 1H), 7.21 (m,  $J = 7.6, 1.4$  Hz, 2H), 5.44 (s, 1H), 5.15 (s, 1H), 4.28 (d,  $J = 7.1$  Hz, 1H), 2.73 (dd,  $J = 15.7, 6.3$  Hz, 1H), 2.63 (dd,  $J = 15.7, 9.2$  Hz, 1H), 2.42 (dt,  $J = 9.1, 6.7$  Hz, 1H).  $^{13}\text{C}$  NMR (151 MHz, MeOD)  $\delta$  175.9, 145.8, 142.2, 127.6, 126.9, 120.1, 118.9, 87.9, 83.6, 53.8, 40.9, 39.4. MP: 189°C  
HRMS (ESI $^+$ )  $m/z$ :  $[\text{M} + \text{Na}]^+$  Calcd for  $\text{C}_{12}\text{H}_{12}\text{BrNO}_2$  303.9944; Found 303.9948.

**2-((1*S*,2*R*,3*R*,4*S*)-3-bromo-1,2,3,4-tetrahydro-1,4-epoxynaphthalen-2-yl)ethan-1-amine (8)**

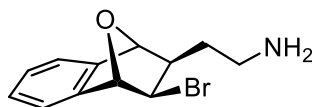

75% yield, yellow solid,  $^1\text{H}$  NMR (400 MHz,  $\text{CD}_3\text{OD\_SPE}$ )  $\delta$  7.41 – 7.36 (m, 1H), 7.34 – 7.30 (m, 1H), 7.24 – 7.20 (m, 2H), 5.47 (s, 1H), 5.19 (s, 1H), 4.29 (d,  $J = 6.4$  Hz, 1H), 3.12 – 3.01 (m, 2H), 2.16 – 2.08 (m, 1H), 2.03 – 1.95 (m, 2H).  $^{13}\text{C}$  NMR (151 MHz, MeOD)  $\delta$  145.7, 142.2, 127.6, 127.0, 120.2, 119.0, 87.9, 83.2, 54.1, 41.6, 38.6, 32.0.

MP: 206°C

HRMS (ESI<sup>+</sup>) m/z: [M + H]<sup>+</sup> Calcd for C<sub>12</sub>H<sub>14</sub>BrNO 268.0332; Found 268.0331.

**2-((1*S*,2*R*,3*R*,4*S*)-3-bromo-1,2,3,4-tetrahydro-1,4-epoxynaphthalen-2-yl)acetic acid (9)**

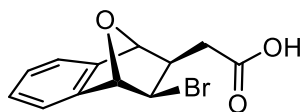

96% yield, light yellow solid, <sup>1</sup>H NMR (400 MHz, CDCl<sub>3</sub>) δ 7.34 – 7.29 (m, 2H), 7.25 – 7.20 (m, 2H), 5.48 (s, 1H), 5.19 (s, 1H), 4.22 (d, *J* = 7.1 Hz, 1H), 2.97 (dd, *J* = 17.7, 6.7 Hz, 1H), 2.83 (dd, *J* = 17.7, 8.7 Hz, 1H), 2.46 (q, *J* = 7.5 Hz, 1H).

<sup>13</sup>C NMR (101 MHz, CDCl<sub>3</sub>) δ 178.6, 145.4, 141.9, 128.1, 127.4, 120.4, 119.5, 87.8, 83.8, 53.2, 40.4, 38.7.

MP: 140°C

HRMS (ESI<sup>+</sup>) m/z: [M + H]<sup>+</sup> Calcd for C<sub>12</sub>H<sub>11</sub>BrO<sub>3</sub> 282.9964; Found 282.9973.

**2-((1*S*,2*R*,3*R*,4*S*)-3-bromo-1,2,3,4-tetrahydro-1,4-epoxynaphthalen-2-yl)-*N*-hydroxyacetimidamide (10)**

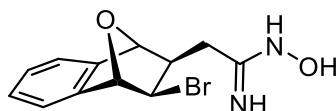

70% yield, white solid, <sup>1</sup>H NMR (400 MHz, CD<sub>3</sub>OD\_SPE) δ 7.40 – 7.33 (m, 1H), 7.30 – 7.24 (m, 1H), 7.25 – 7.16 (m, 2H), 5.44 (s, 1H), 5.25 (s, 1H), 4.28 (d, *J* = 5.8 Hz, 1H), 2.94 – 2.83 (m, 1H), 2.48 – 2.38 (m, 2H).

<sup>13</sup>C NMR (101 MHz, CD<sub>3</sub>OD\_SPE) δ 158.5, 145.8, 142.5, 127.5, 126.9, 120.0, 118.9, 87.9, 82.6, 54.0, 40.8, 32.5.

MP: 153°C

HRMS (ESI<sup>+</sup>) m/z: [M + H]<sup>+</sup> Calcd for C<sub>12</sub>H<sub>13</sub>BrN<sub>2</sub>O<sub>2</sub> 297.0233; Found 297.0240.

**2-((1*S*,2*S*,4*R*)-1,2,3,4-tetrahydro-1,4-epoxynaphthalen-2-yl)acetonitrile (11)**

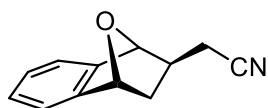

83% yield, light yellow oil, <sup>1</sup>H NMR (400 MHz, CDCl<sub>3</sub>) δ 7.29 (dt, *J* = 7.7, 3.9 Hz, 1H), 7.27 – 7.20 (m, 1H), 7.19 (dd, *J* = 5.4, 3.0 Hz, 2H), 5.43 (d, *J* = 4.8 Hz, 1H), 5.17 (s, 1H), 2.63 (dd, *J* = 16.7, 8.4 Hz, 1H), 2.54 (dd, *J* = 16.7, 7.2 Hz, 1H), 2.14 (qd, *J* = 7.9, 3.6 Hz, 1H), 1.78 (dd, *J* = 12.0, 7.8 Hz, 1H), 1.68 (ddd, *J* = 12.0, 4.9, 3.6 Hz, 1H).

<sup>13</sup>C NMR (101 MHz, CDCl<sub>3</sub>) δ 145.4, 143.8, 127.2, 127.0, 119.5, 119.0, 119.0, 82.2, 79.5, 37.5, 34.8, 22.6.

HRMS (ESI<sup>+</sup>) m/z: [M + H]<sup>+</sup> Calcd for C<sub>12</sub>H<sub>11</sub>NO 186.0913; Found 186.0919.

**2-(((1*S*,2*R*,3*R*,4*S*)-3-bromo-1,2,3,4-tetrahydro-1,4-epoxynaphthalen-2-yl)methyl)-4,5-dihydrothiazole (12)**

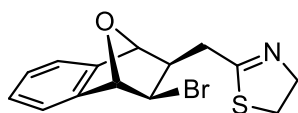

90% yield, white solid,  $^1\text{H}$  NMR (400 MHz,  $\text{CDCl}_3$ )  $\delta$  7.36 – 7.29 (m, 2H), 7.25 – 7.19 (m, 2H), 5.50 (s, 1H), 5.25 (s, 1H), 4.33 – 4.23 (m, 3H), 3.37 (t,  $J$  = 8.4 Hz, 2H), 3.03 – 2.90 (m, 2H), 2.57 (dt,  $J$  = 9.3, 6.5 Hz, 1H).

$^{13}\text{C}$  NMR (101 MHz,  $\text{CDCl}_3$ )  $\delta$  170.0, 145.8, 142.1, 127.9, 127.2, 120.3, 119.4, 87.8, 83.6, 64.7, 53.8, 42.4, 38.5, 33.9.

MP: 82°C

HRMS ( $\text{ESI}^+$ )  $m/z$ :  $[\text{M} + \text{H}]^+$  Calcd for  $\text{C}_{14}\text{H}_{14}\text{BrNOS}$  324.0052; Found 324.0060.

**(1S,2R,3S,4S)-2-bromo-3-(trichloromethyl)-1,2,3,4-tetrahydro-1,4-epoxynaphthalene-5,8-dione (13)**

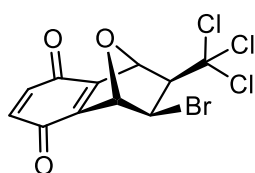

64% yield, yellow solid,  $^1\text{H}$  NMR (400 MHz,  $\text{CDCl}_3$ )  $\delta$  6.76 (s, 2H), 5.67 (d,  $J$  = 4.6 Hz, 1H), 5.59 (s, 1H), 4.36 (t,  $J$  = 4.2 Hz, 1H), 3.12 (d,  $J$  = 3.9 Hz, 1H).

$^{13}\text{C}$  NMR (101 MHz,  $\text{CDCl}_3$ )  $\delta$  181.8, 181.7, 151.4, 150.0, 136.5, 136.2, 97.7, 81.2, 80.7, 68.6, 41.5.

MP: 107°C

HRMS ( $\text{ESI}^+$ )  $m/z$ :  $[\text{M} + \text{H}]^+$  Calcd for  $\text{C}_{11}\text{H}_6\text{BrCl}_3\text{O}_3$  370.8639; Found 370.8643.

## 9. Reference

- [1] P. Gandeepan, P. Rajamalli, C.-H. Cheng, *Angew. Chem.* **2016**, 55, 4368-4368.
- [2] D. Meyer, E. Vin, B. Wyler, G. Lapointe, P. Renaud, *Synlett*, **2016**, 745.
- [3] (a) C. Lee, W. Yang, R. G. Parr, *Phys. Rev. B* **1988**, 37, 785-789; (b) A. D. Becke, *J. Chem. Phys.* **1993**, 98, 5648-5652; (c) S. Grimme, J. Antony, S. Ehrlich, H. Krieg, *J. Chem. Phys.* **2010**, 132, 154104.
- [4] F. Weigend, R. Ahlrichs, *Phys. Chem. Chem. Phys.* **2005**, 7, 3297-3305.
- [5] (a) J. Tomasi, B. Mennucci, R. Cammi, *Chem. Rev.* **2005**, 105, 2999-3094; (b) G. Scalmani, M. J. Frisch, *J. Chem. Phys.* **2010**, 132, 114110.
- [6] (a) Y. Zhao, D. G. Truhlar, *J. Chem. Phys.* **2006**, 125, 194101-194118; (b) J. P. Perdew, K. Burke, M. Ernzerhof, *Phys. Rev. Lett.* **1996**, 77, 3865-3868; (c) D. Becke, *Phys. Rev. A*, **1988**, 38, 3098-3100; (d) J. P. Perdew, *Phys. Rev. B*, **1986**, 33, 8822-8824; (e) J.-D. Chai, M. Head-Gordon, *Phys. Chem. Chem. Phys.* **2008**, 10, 6615-6620.
- [7] Gaussian 16, Revision A.03, Frisch, M. J.; Trucks, G. W.; Schlegel, H. B.; Scuseria, G. E.; Robb, M. A.; Cheeseman, J. R.; Scalmani, G.; Barone, V.; Mennucci, B.;



- Petersson, G. A.; Nakatsuji, H.; Caricato, M.; Li, X.; Hratchian, H. P.; Izmaylov, A. F.; Bloino, J.; Zheng, G.; Sonnenberg, J. L.; Hada, M.; Ehara, M.; Toyota, K.; Fukuda, R.; Hasegawa, J.; Ishida, M.; Nakajima, T.; Honda, Y.; Kitao, O.; Nakai, H.; Vreven, T.; Montgomery, J. A., Jr.; Peralta, J. E.; Ogliaro, F.; Bearpark, M.; Heyd, J. J.; Brothers, E.; Kudin, K. N.; Staroverov, V. N.; Kobayashi, R.; Normand, J.; Raghavachari, K.; Rendell, A.; Burant, J. C.; Iyengar, S. S.; Tomasi, J.; Cossi, M.; Rega, N.; Millam, J. M.; Klene, M.; Knox, J. E.; Cross, J. B.; Bakken, V.; Adamo, C.; Jaramillo, J.; Gomperts, R.; Stratmann, R. E.; Yazyev, O.; Austin, A. J.; Cammi, R.; Pomelli, C.; Ochterski, J. W.; Martin, R. L.; Morokuma, K.; Zakrzewski, V. G.; Voth, G. A.; Salvador, P.; Dannenberg, J. J.; Dapprich, S.; Daniels, A. D.; Farkas, Ö.; Foresman, J. B.; Ortiz, J. V.; Cioslowski, J.; Fox, D. J. Gaussian, Inc., Wallingford CT, **2016**.
- [8] C. Y. Legault, CYL View, version 20; Universite de Sherbrooke, Sherbrooke, Quebec, Canada, **2020**; <https://www.cylview.org>.
- [9] (a) G. Luchini, J. V. Alegre-Requena, I. Funes-Ardoiz; Paton, R. S. GoodVibes: automated thermochemistry for heterogeneous computational chemistry data. *F1000Research* **2020**, 9, 291. (b) Grimme, S. *Chem. Eur. J.* **2012**, 18, 9955–9964.
- [10] L. Falivene, R. Credendino, A. Poater, A. Petta, L. Serra, R. Oliva, V. Scarano, L. Cavallo, SambVca 2. A Web Tool for Analyzing Catalytic Pockets with Topographic Steric Maps. *Organometallics* **2016**, 35, 2286–2293

## 10. NMR Spectra of Products

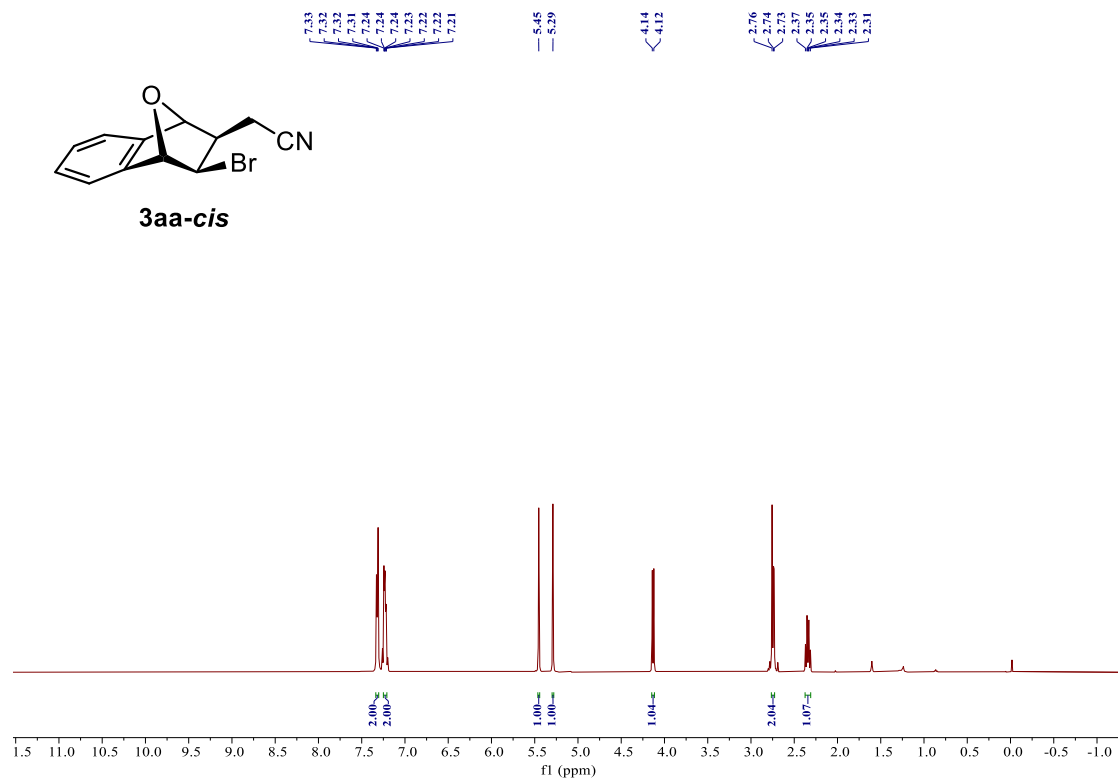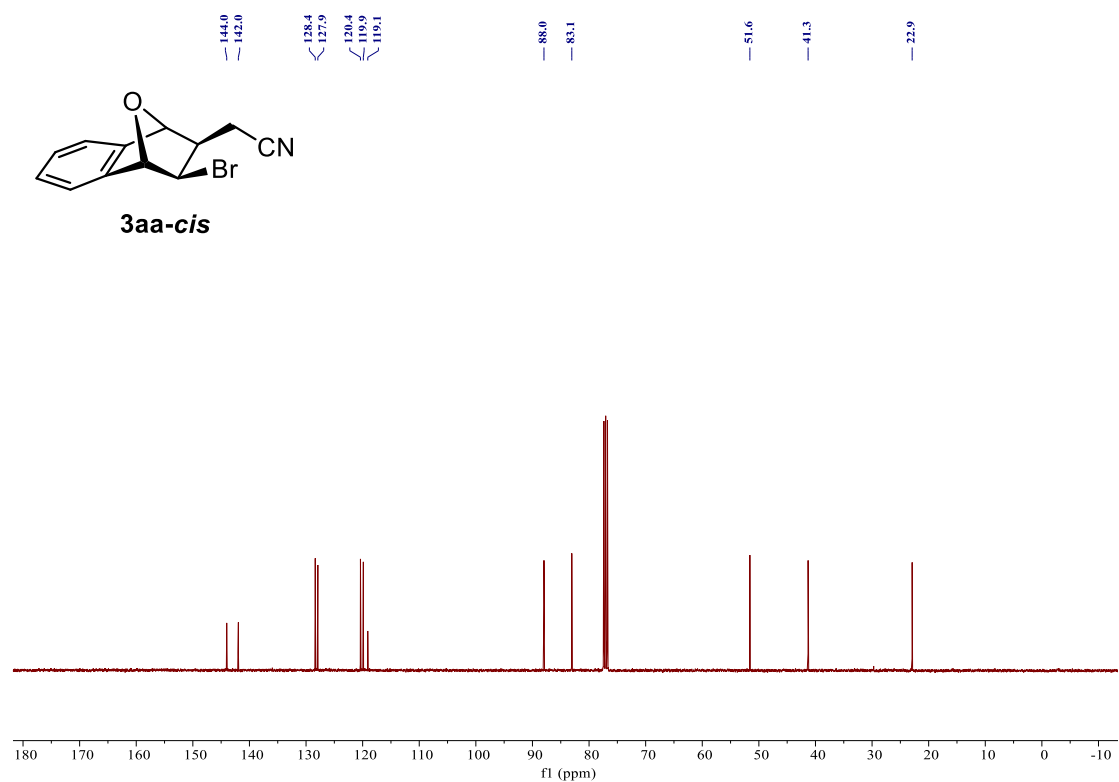

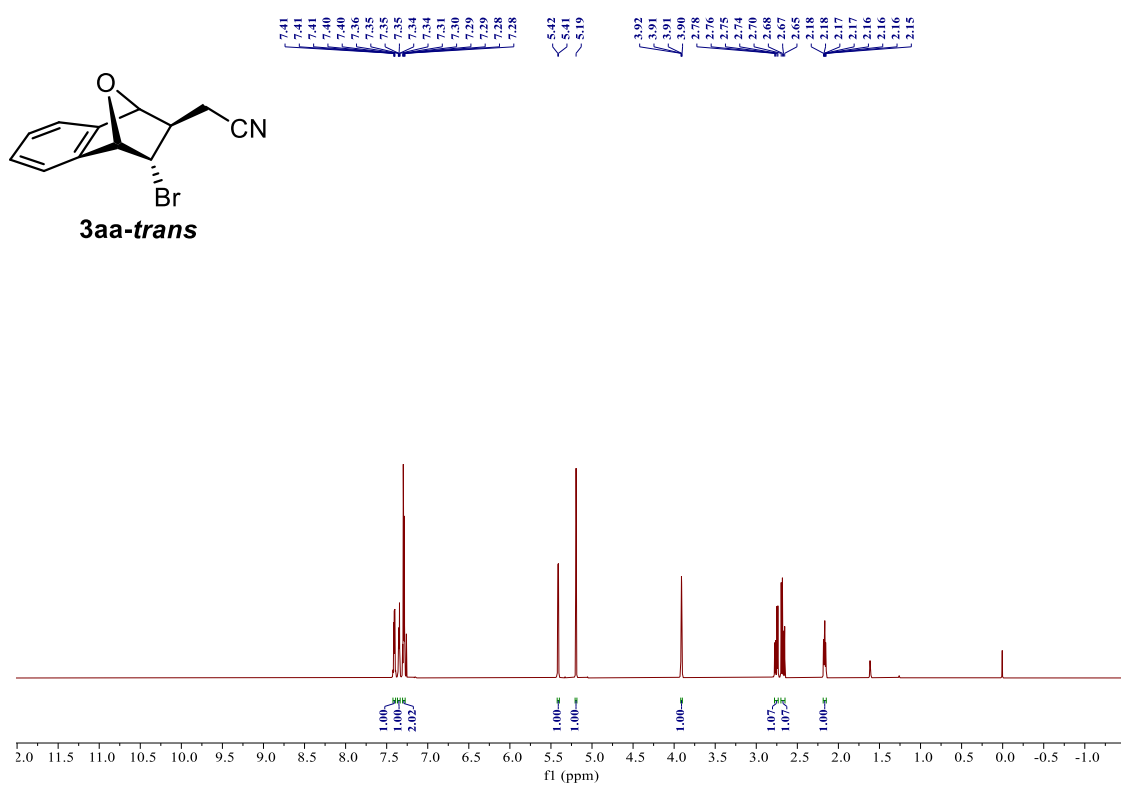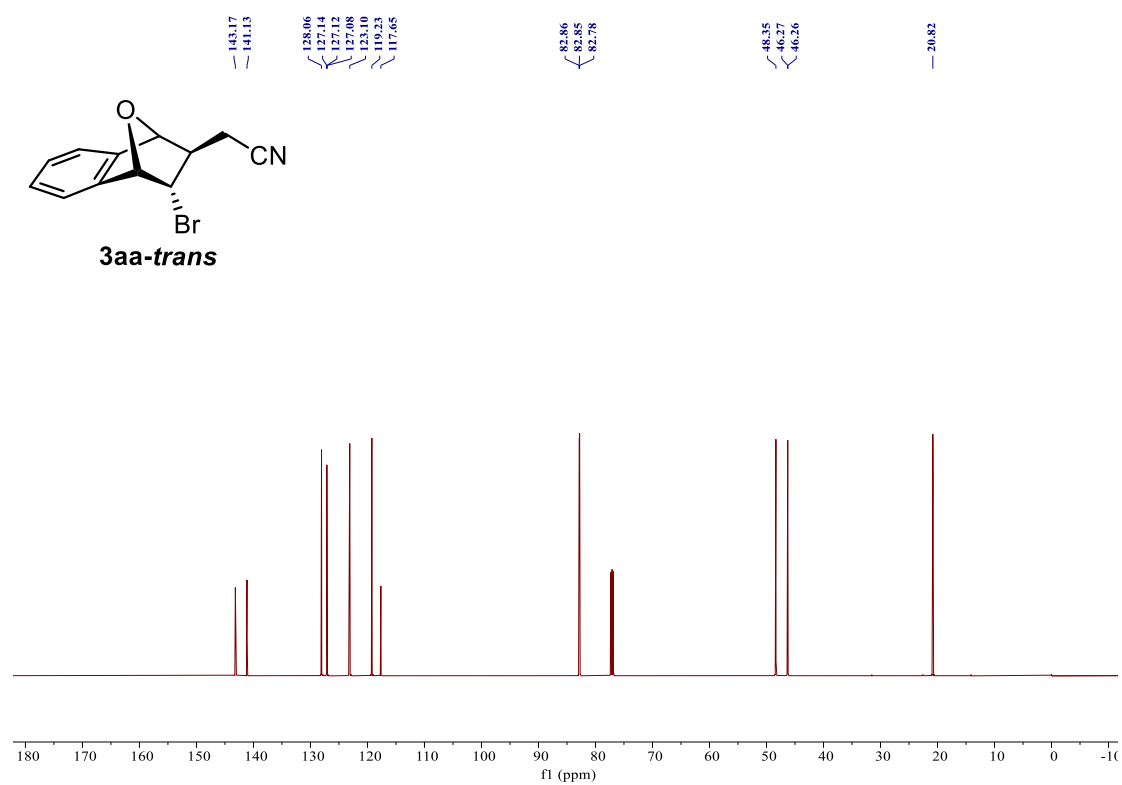

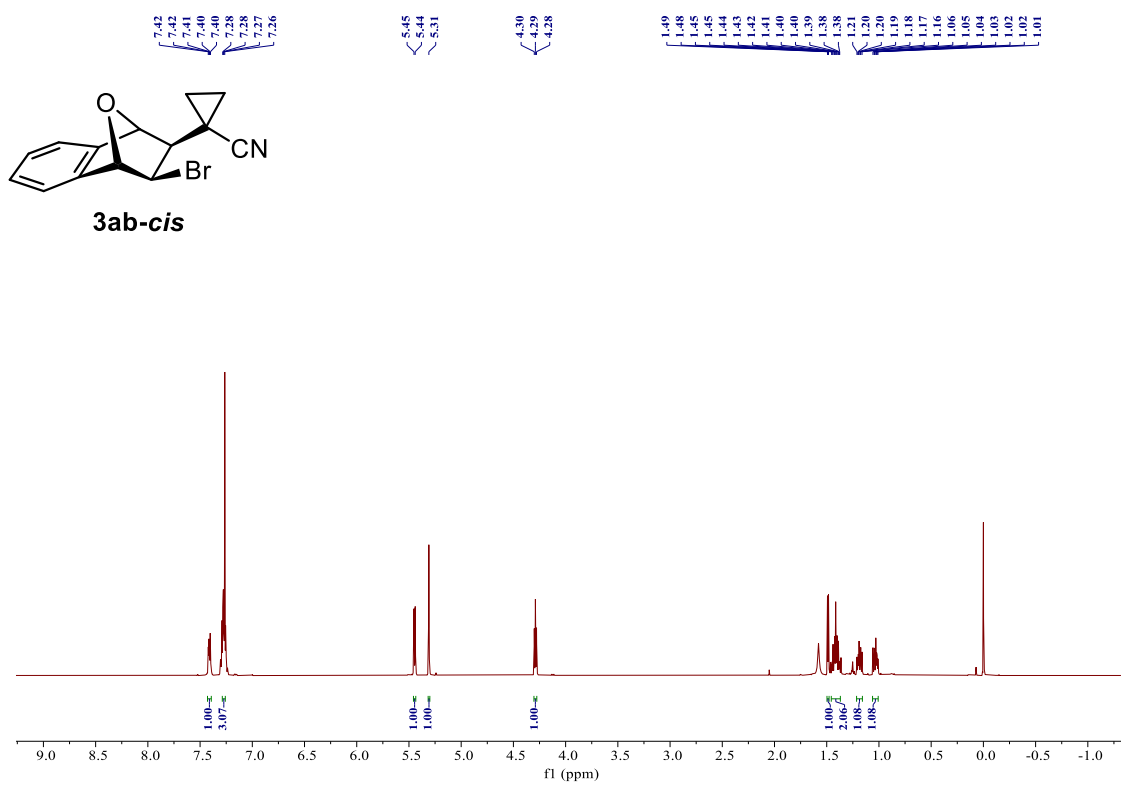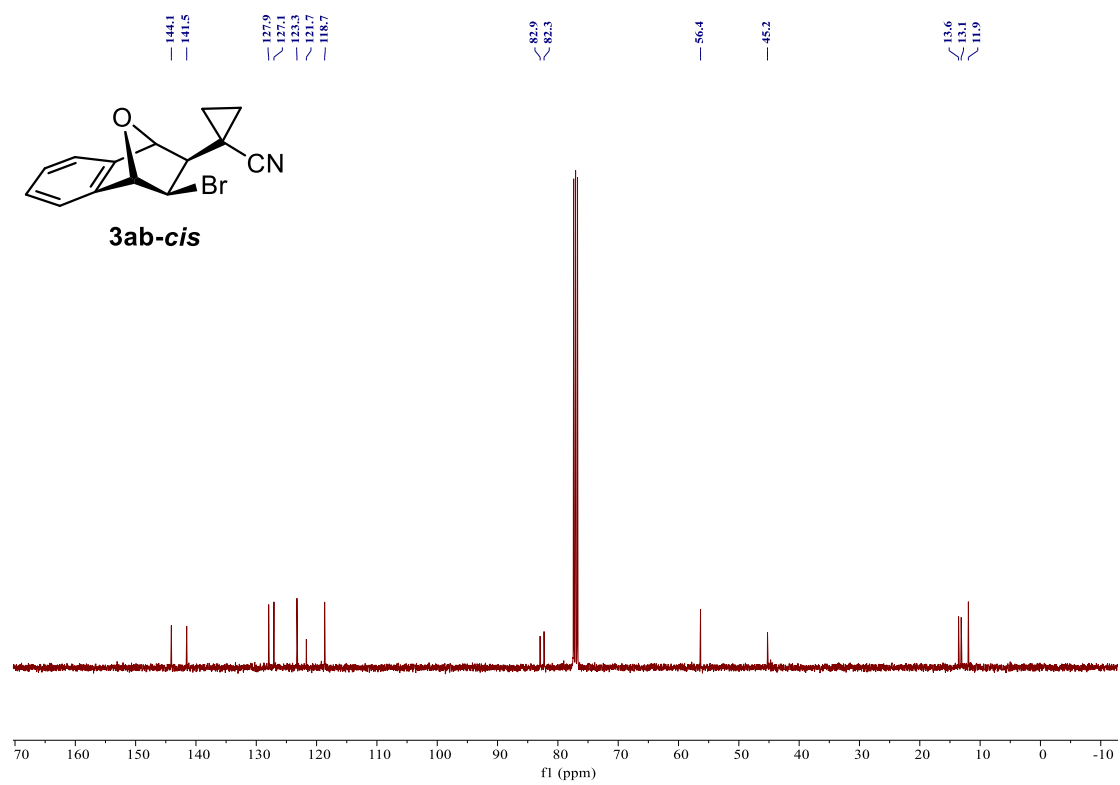

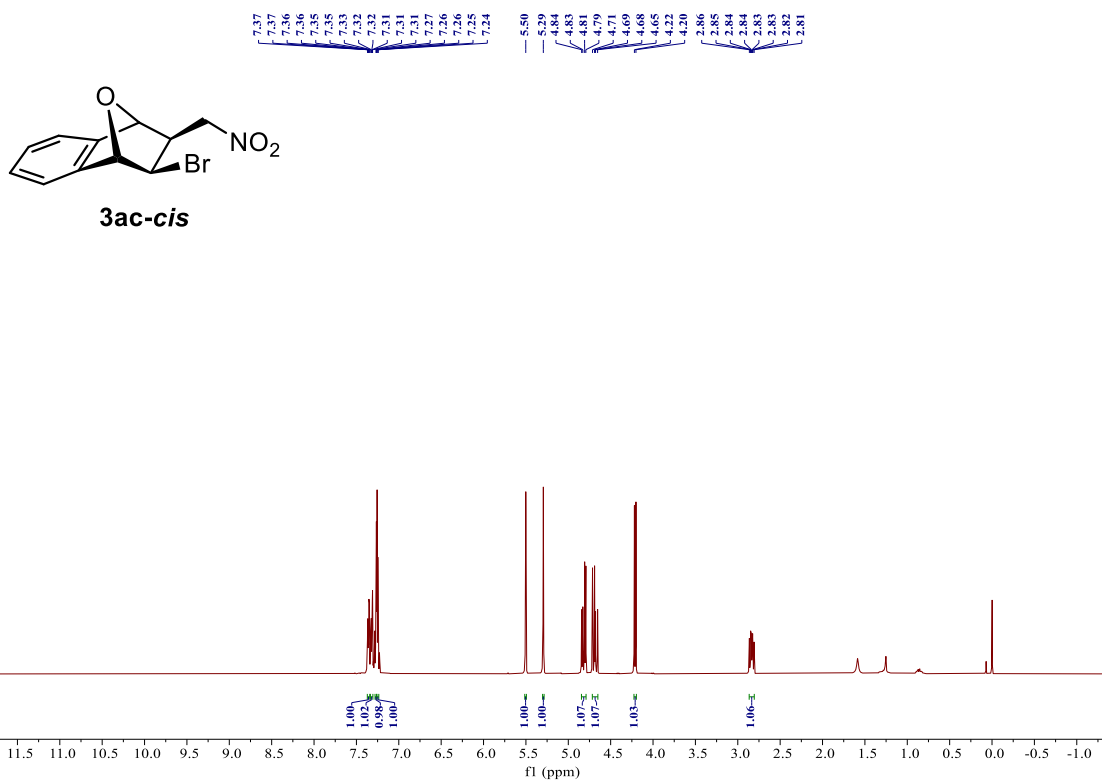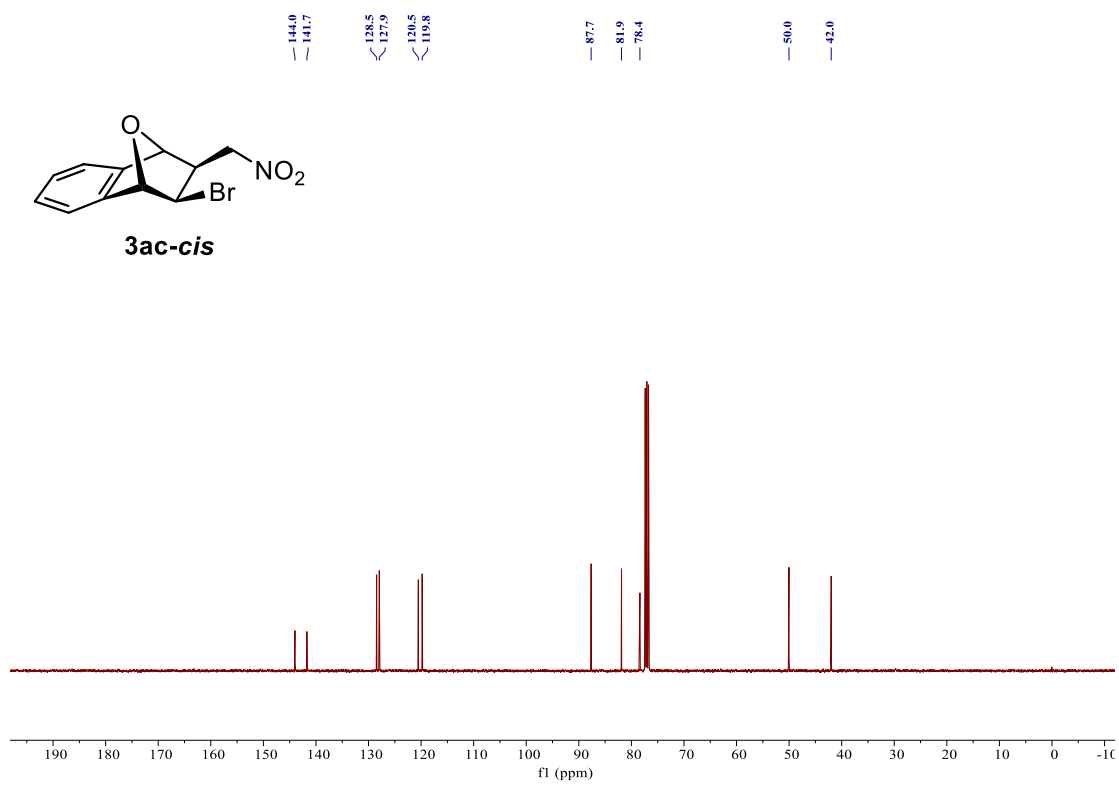

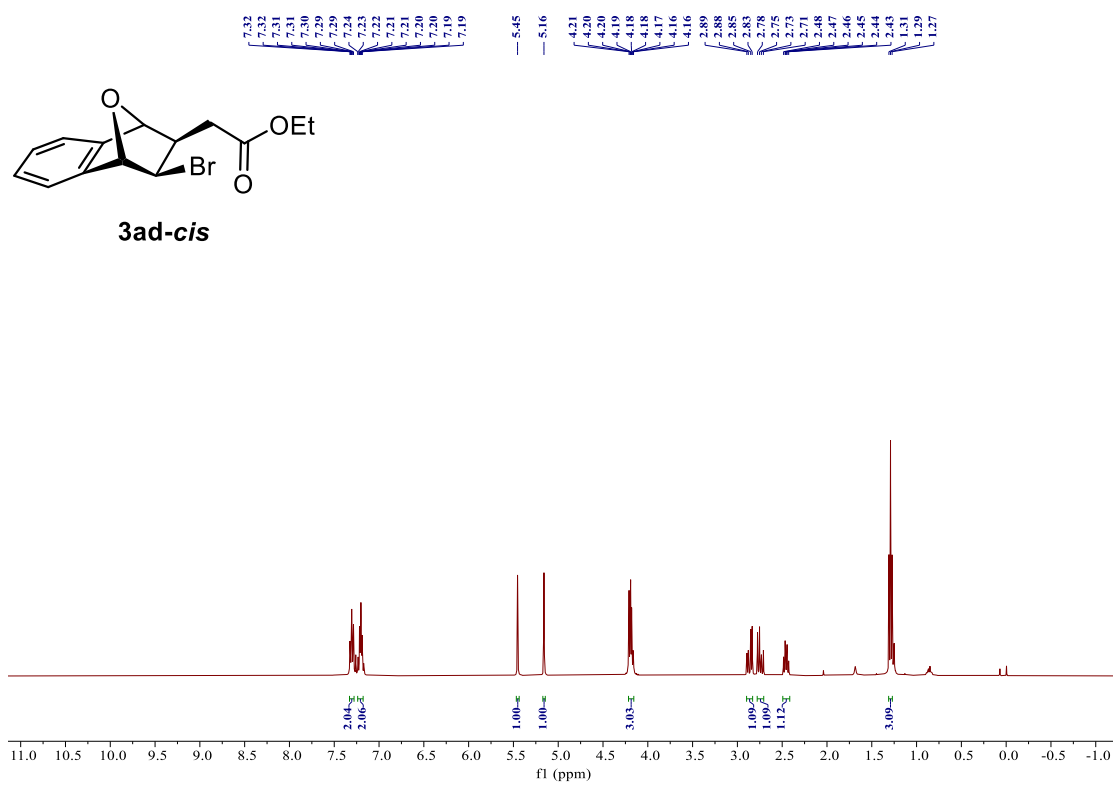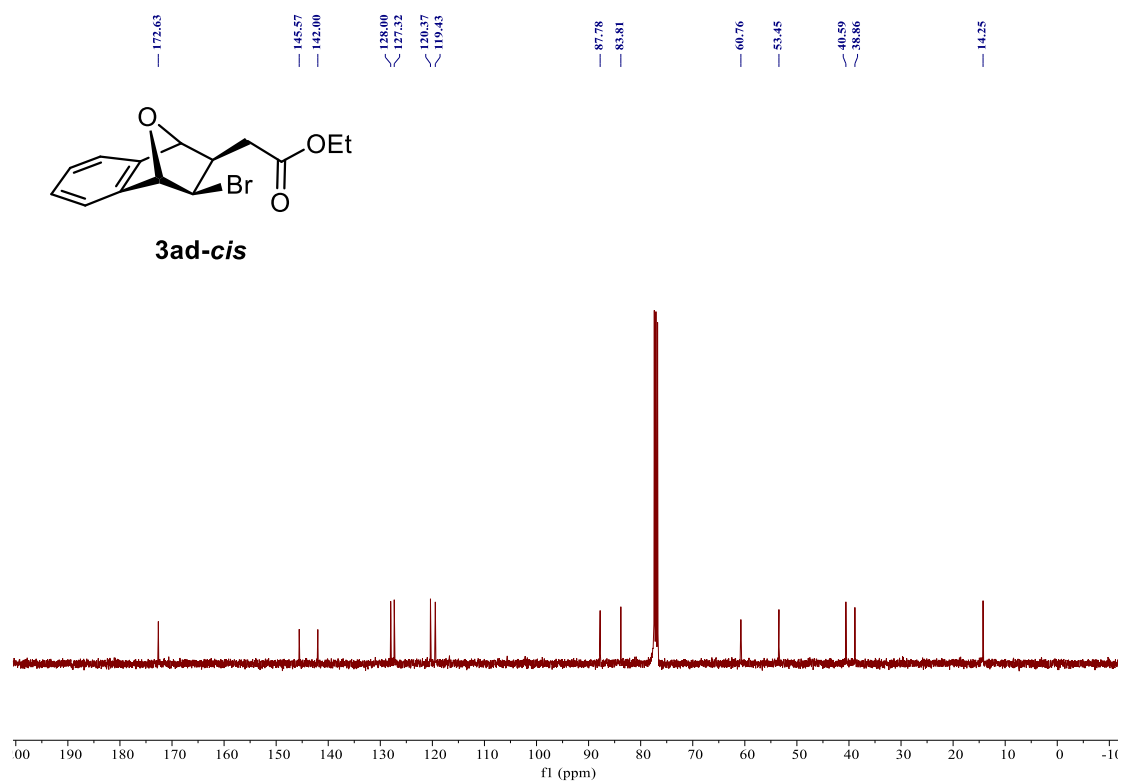

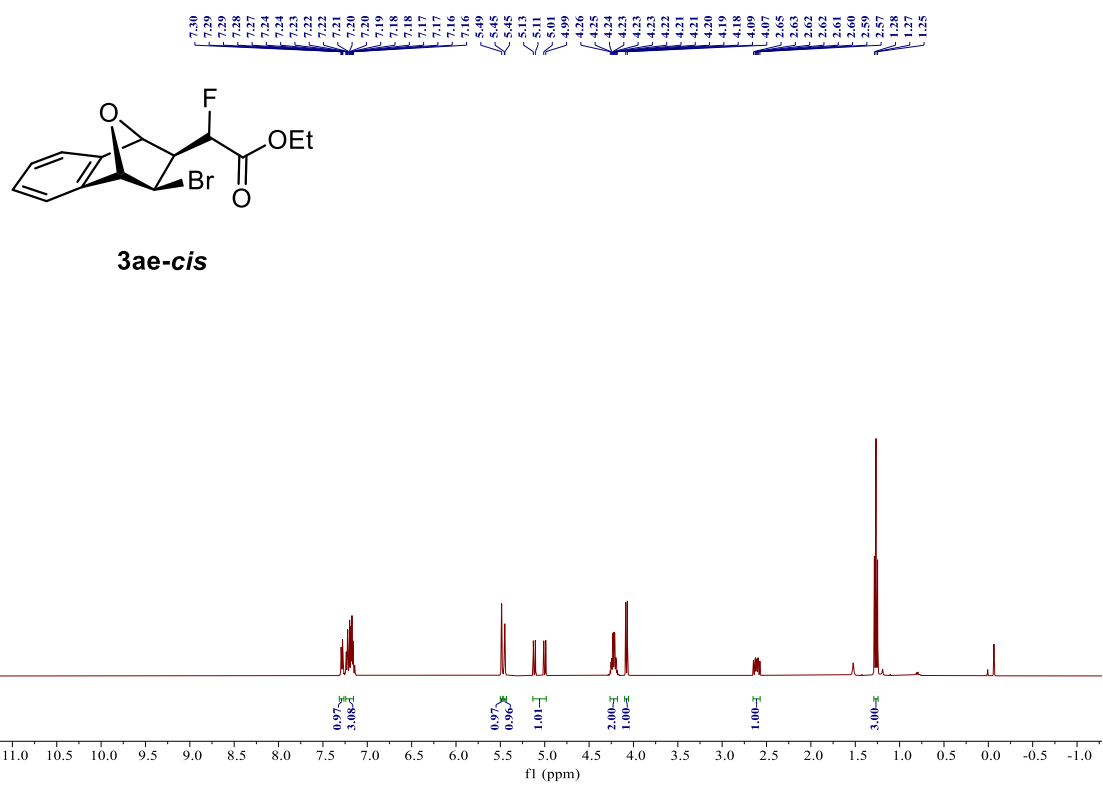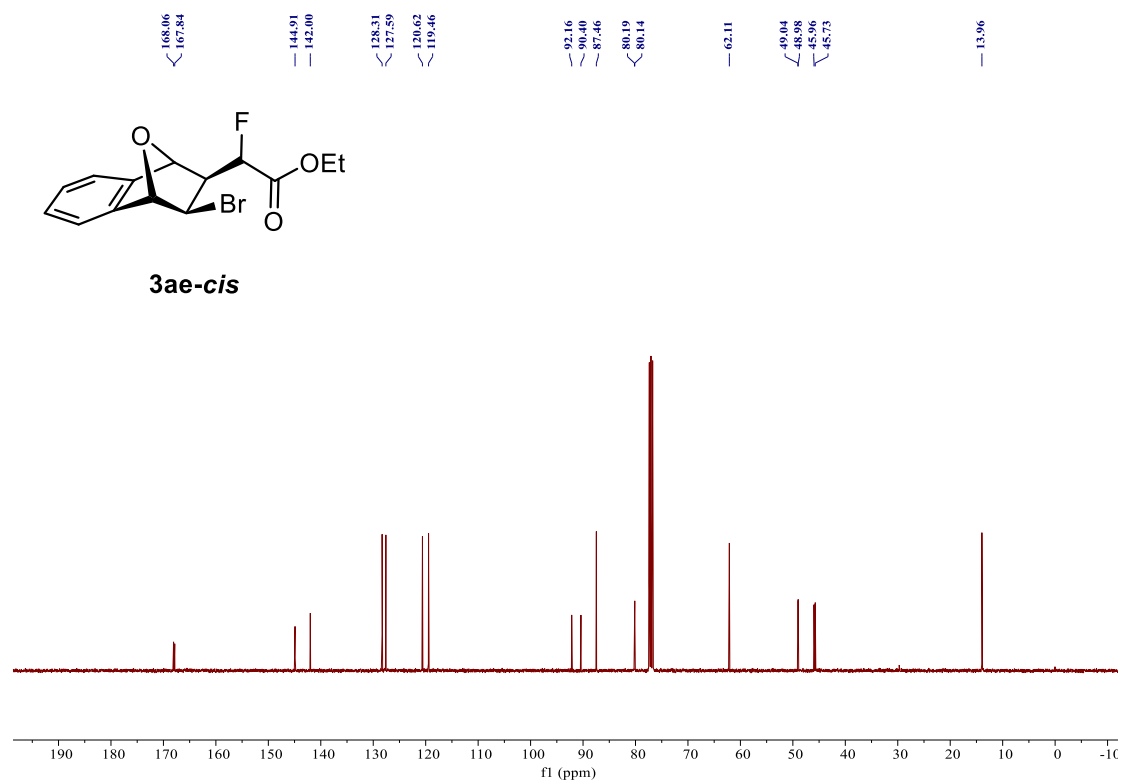

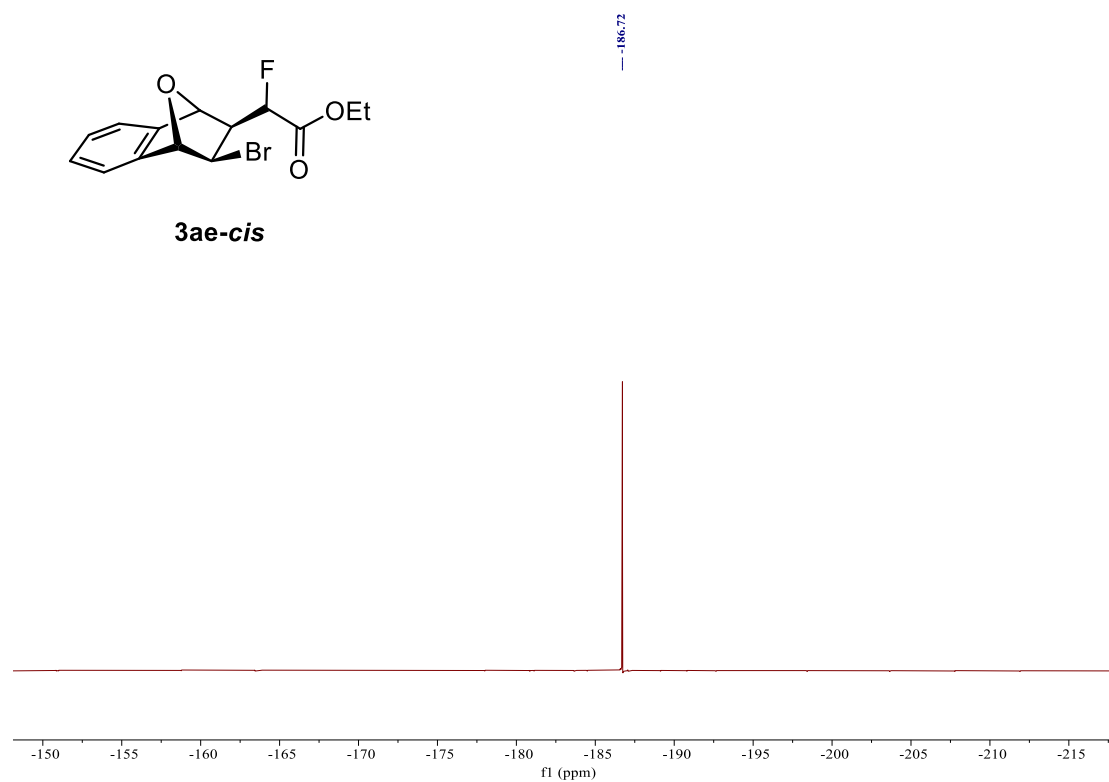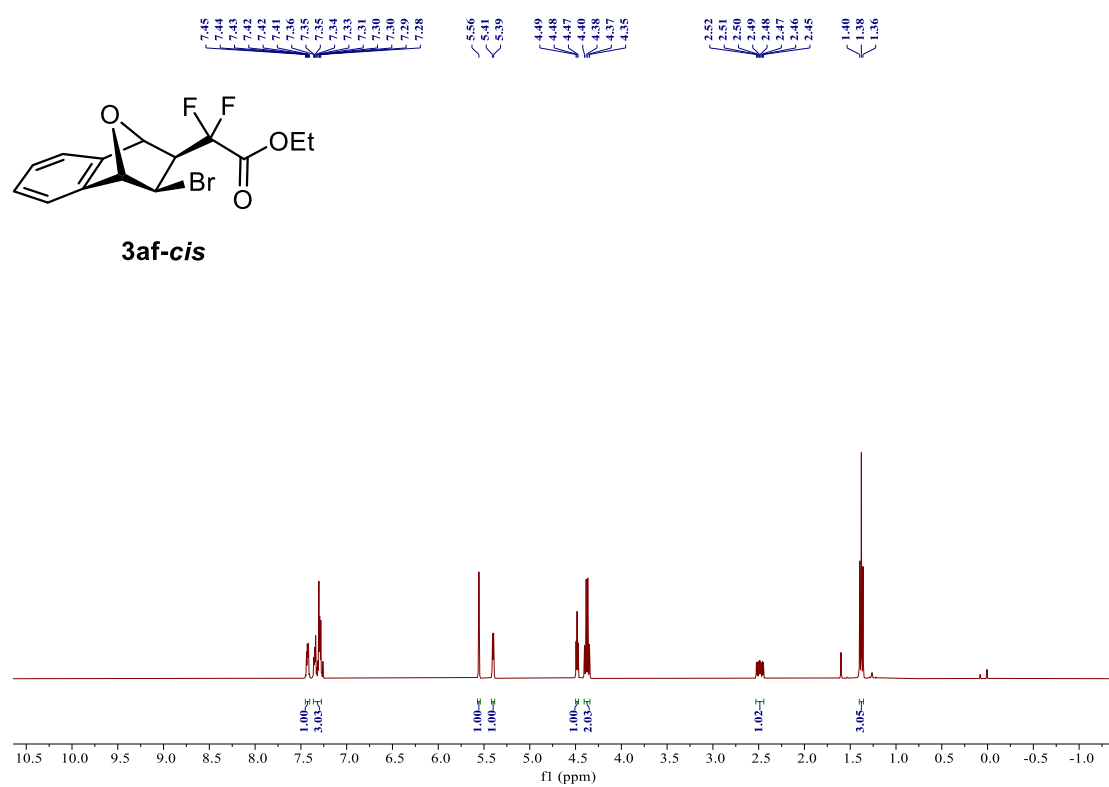



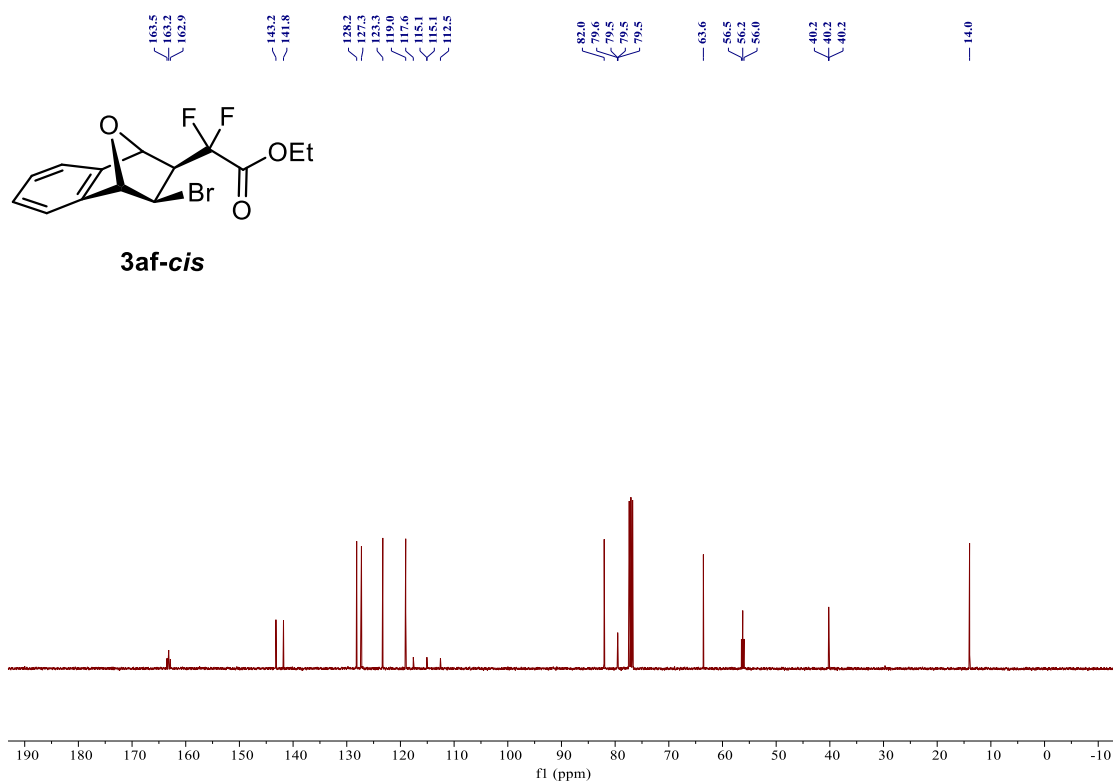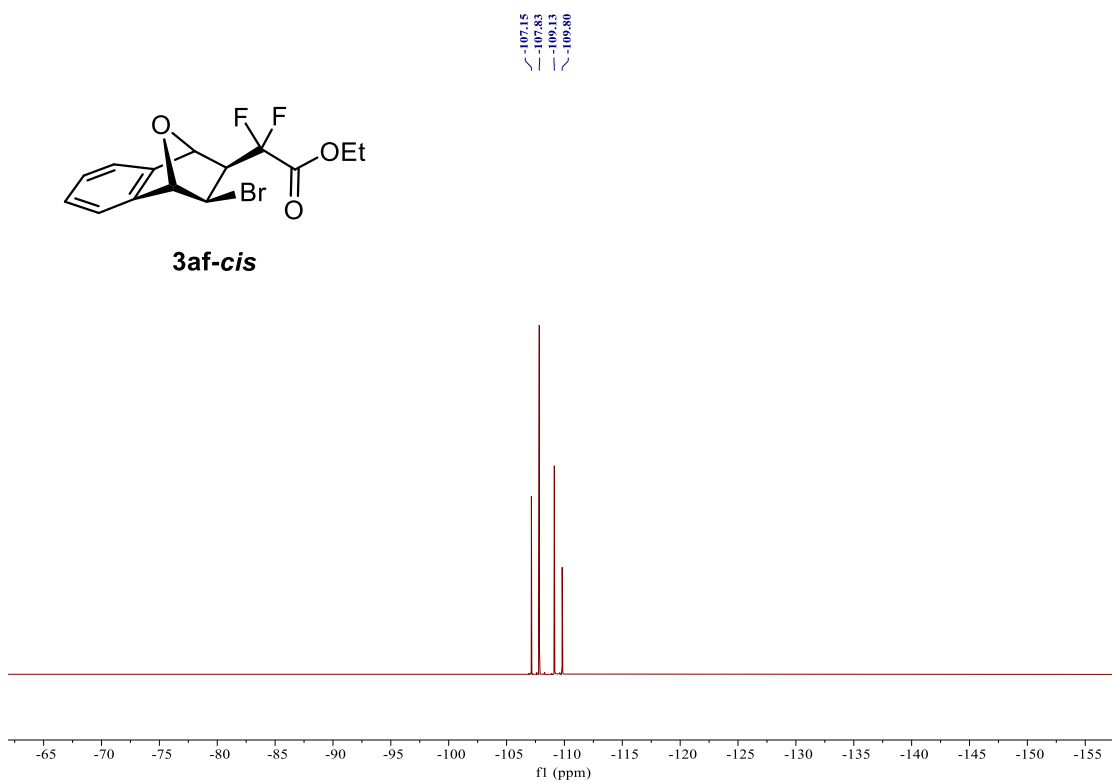

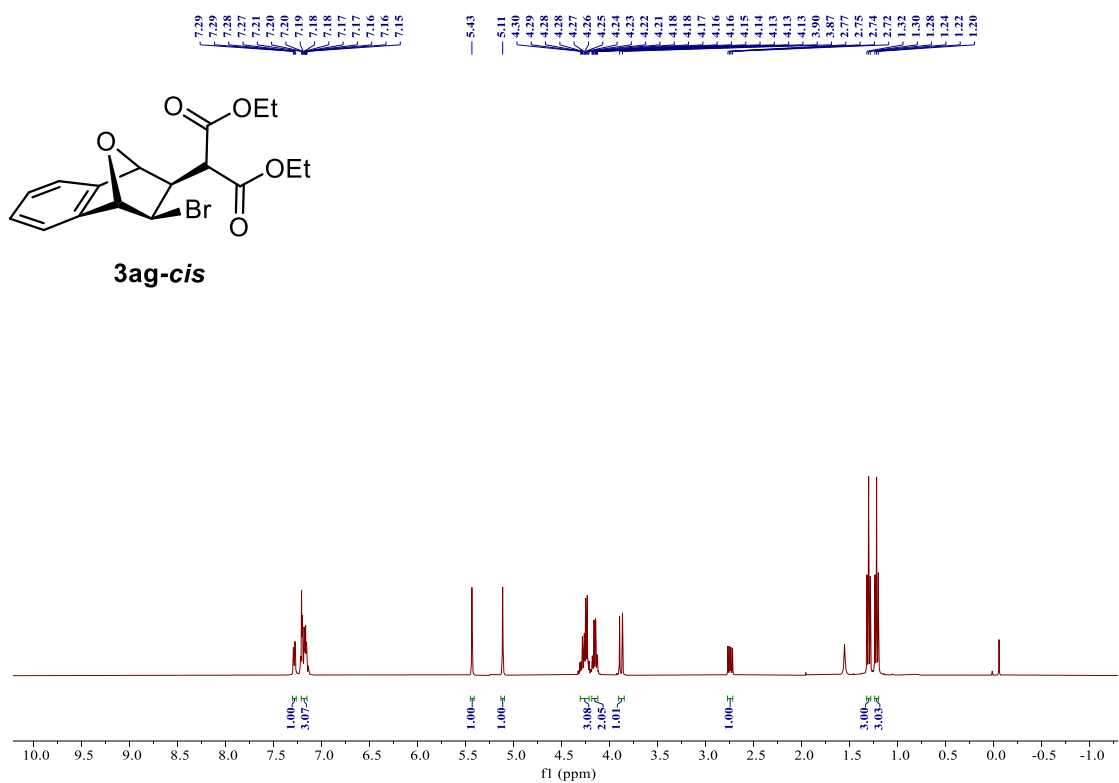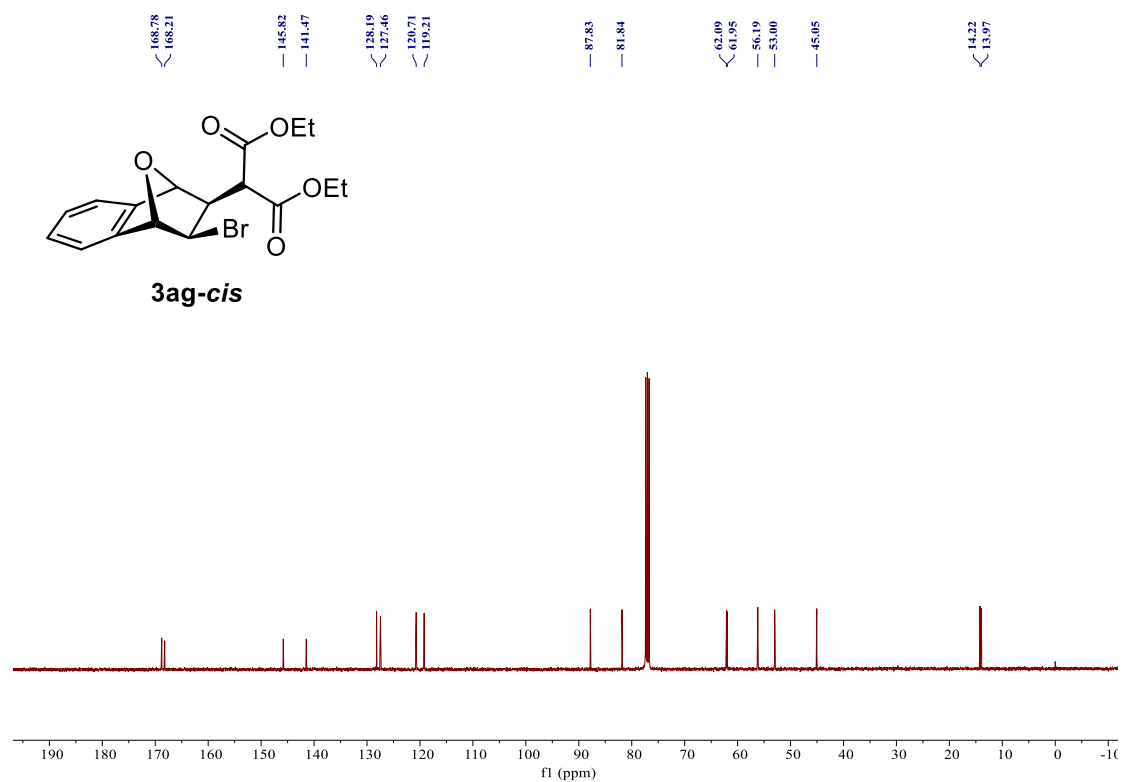

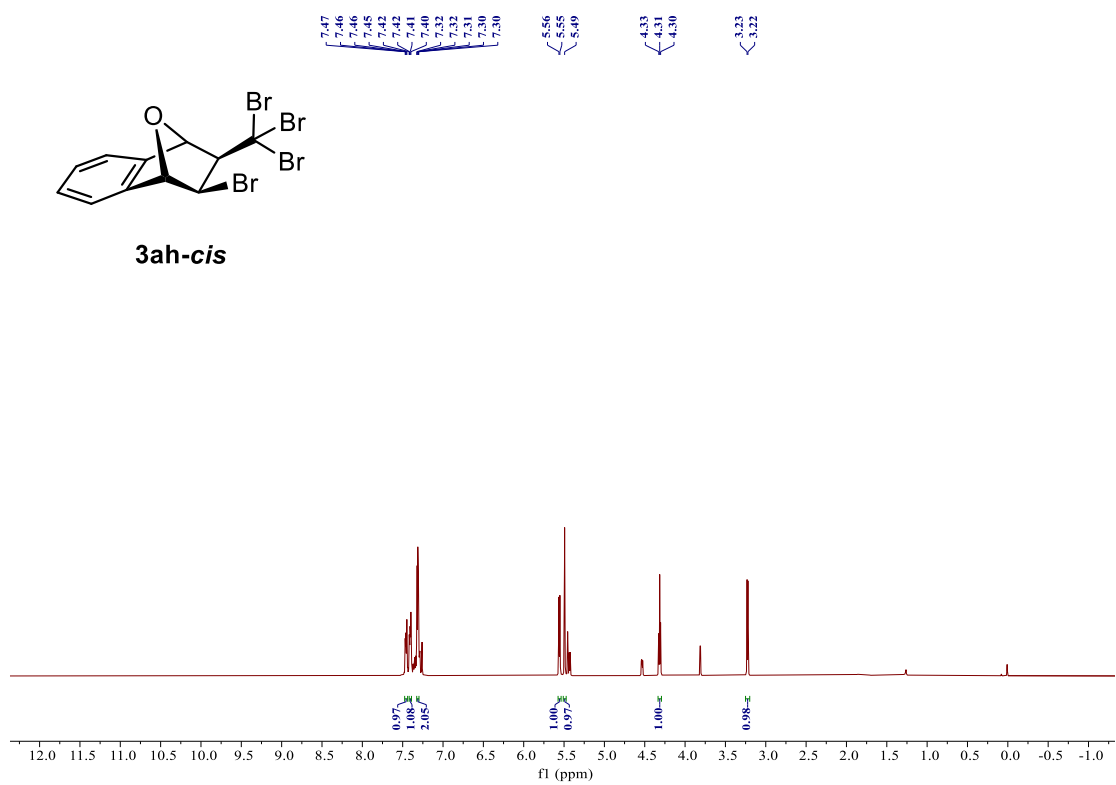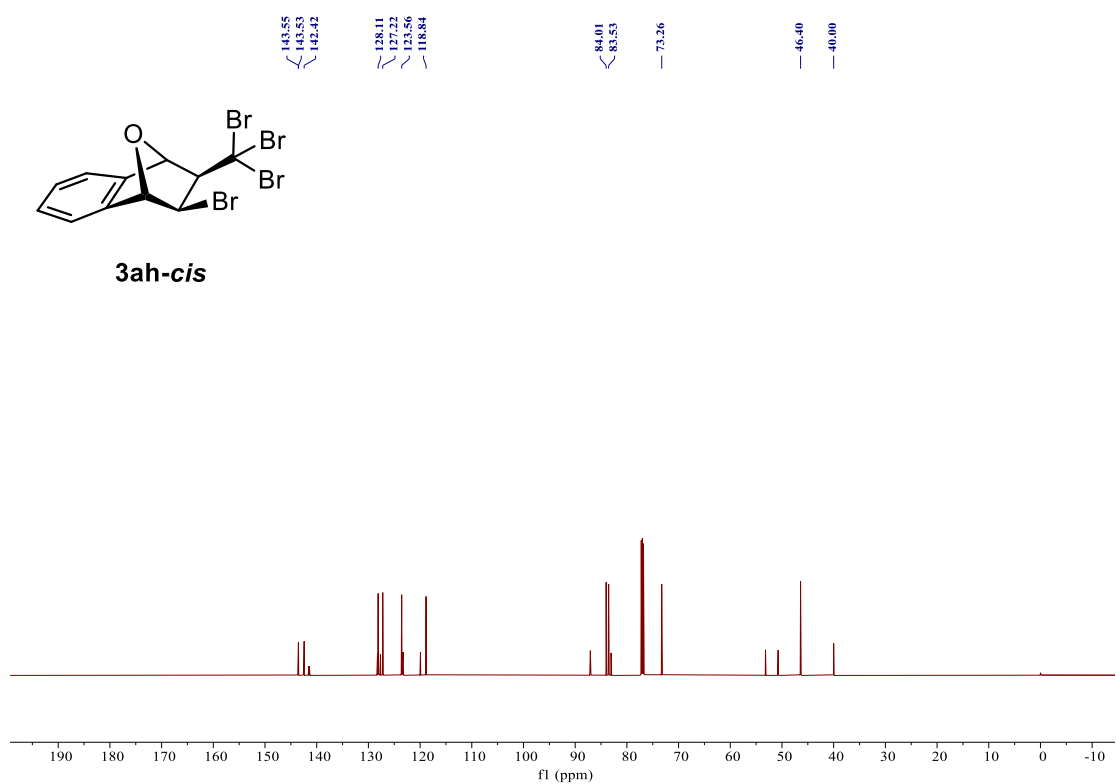

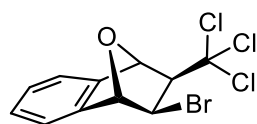

3ai-cis

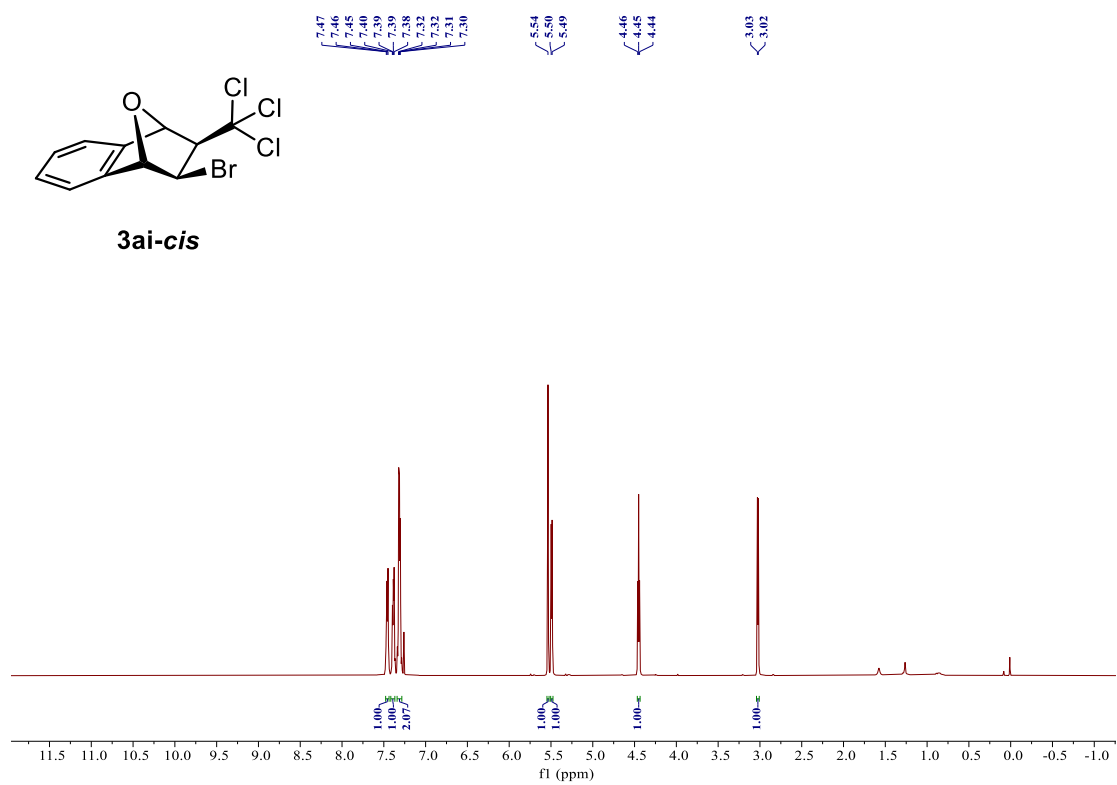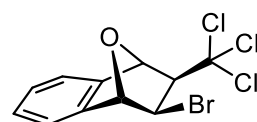

3ai-cis

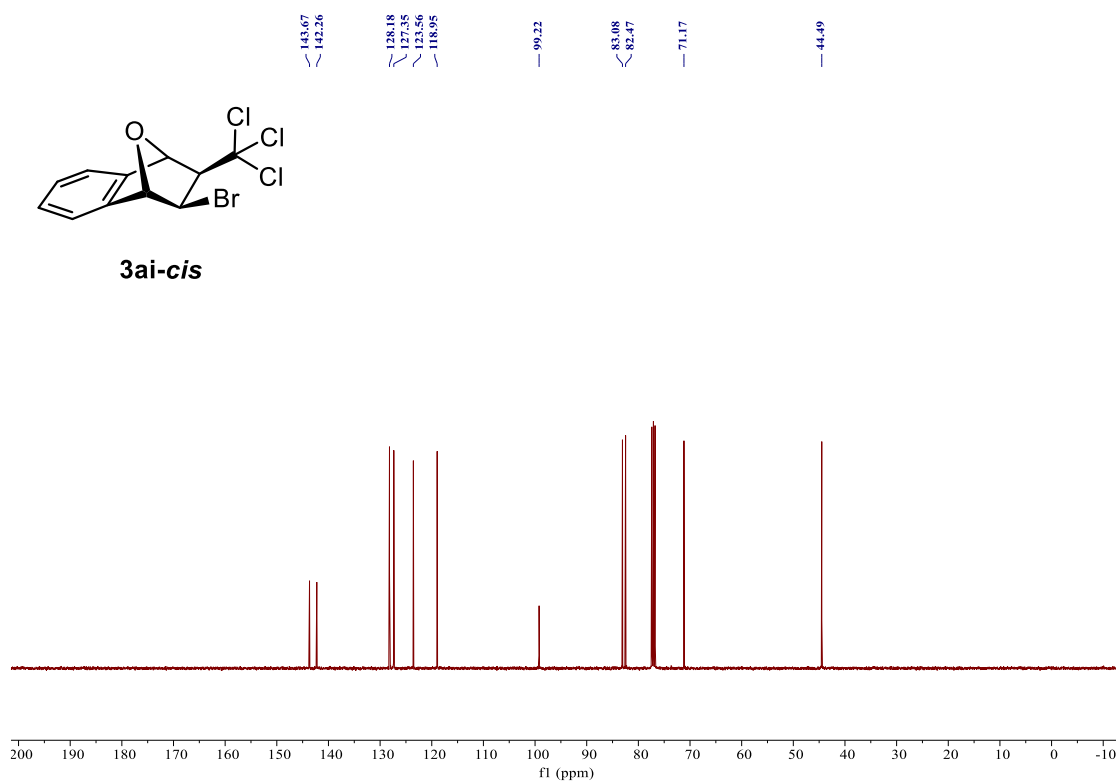

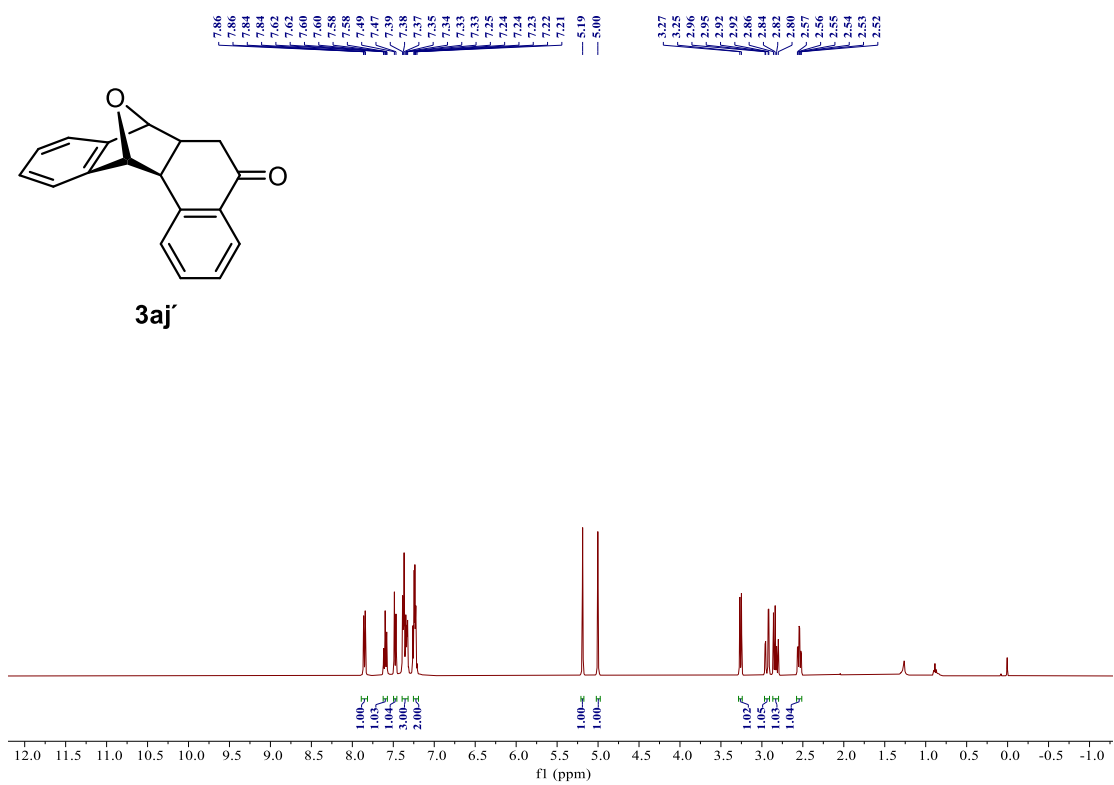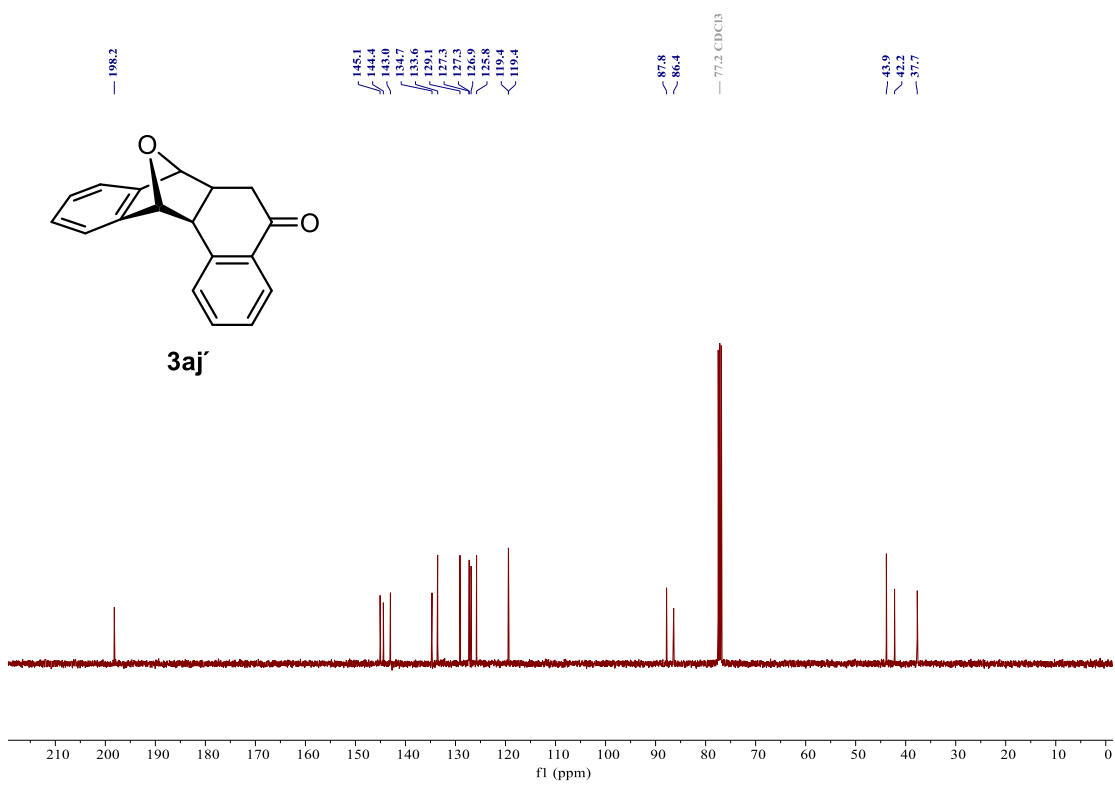

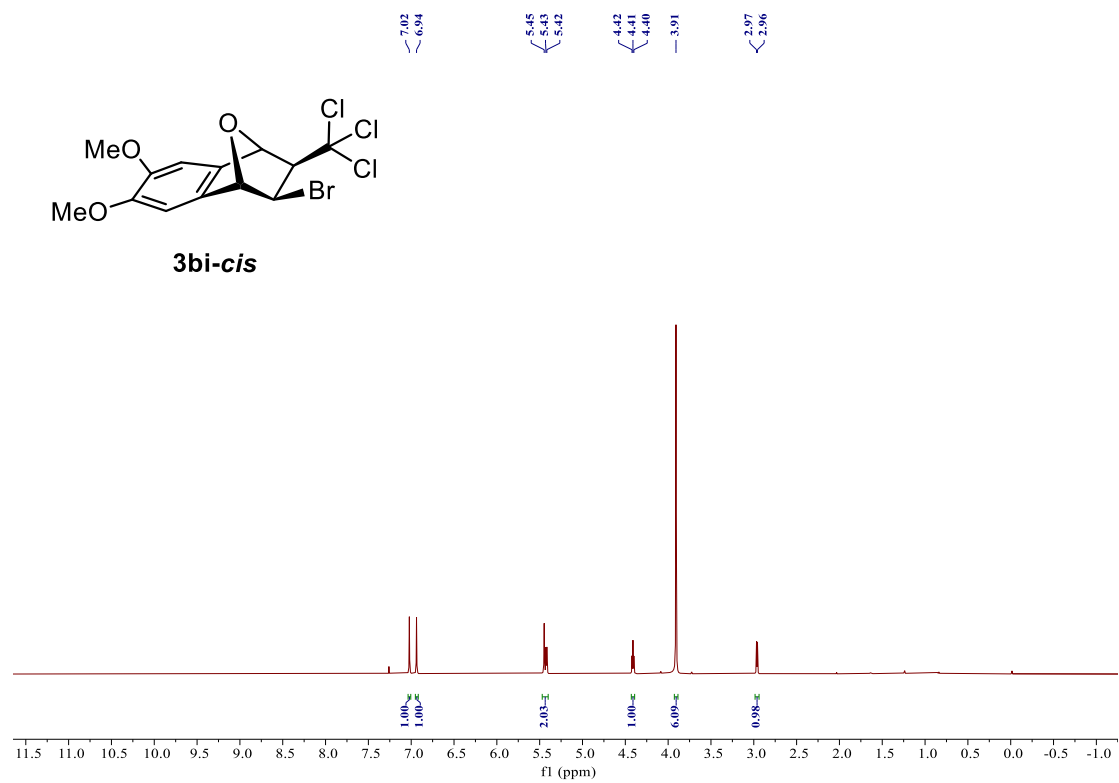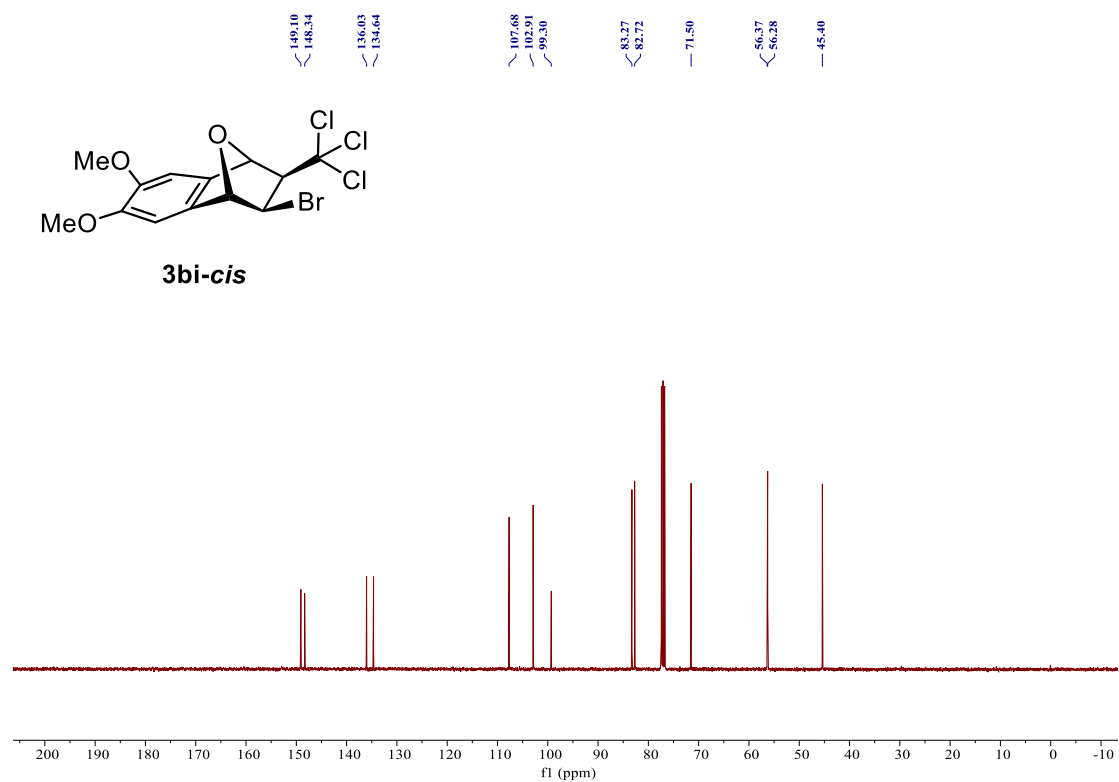

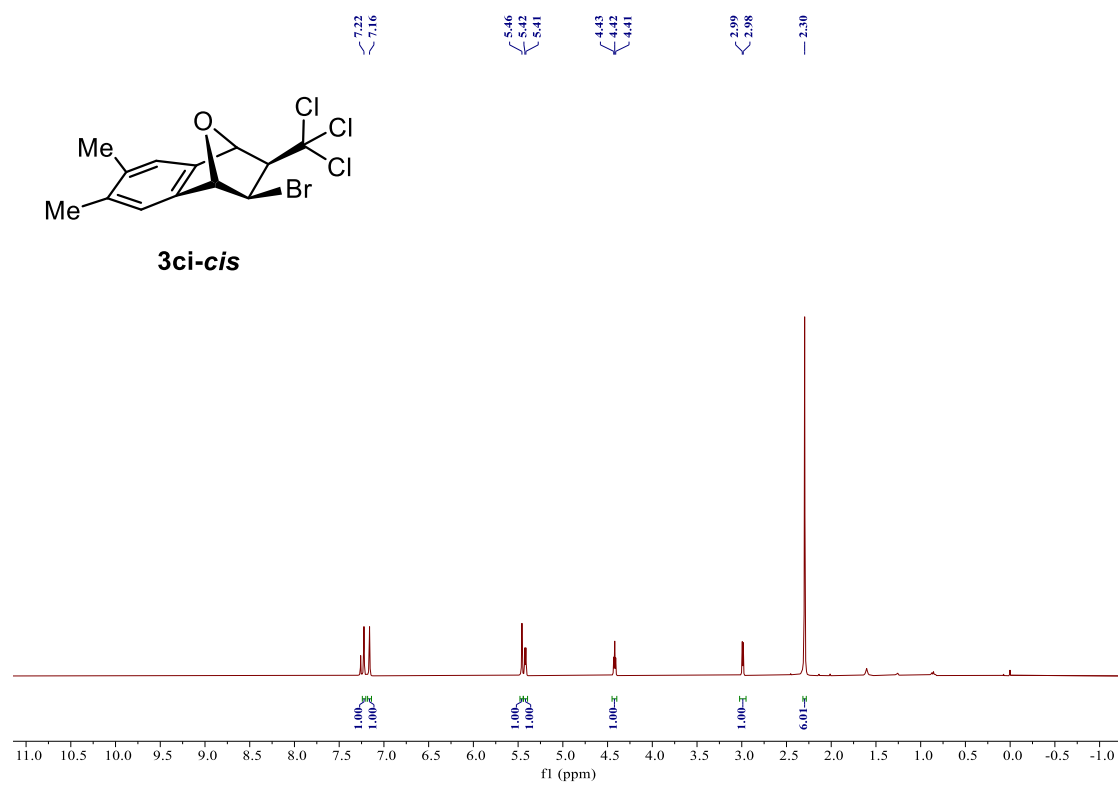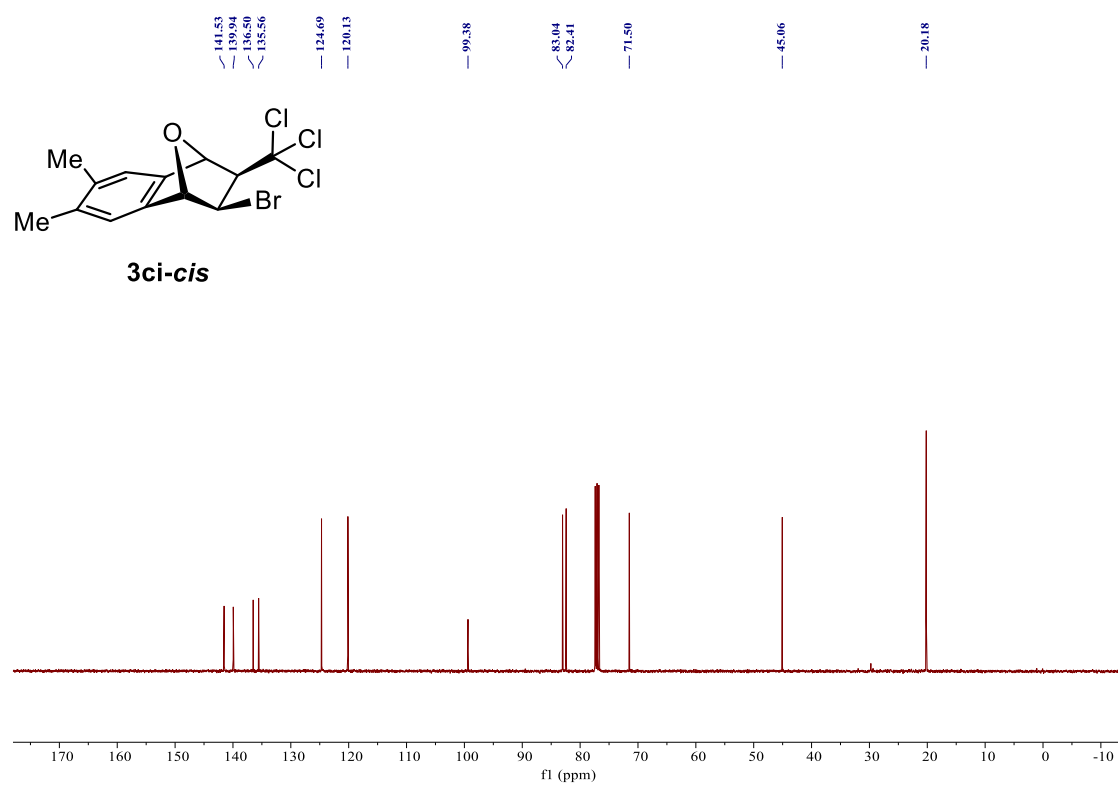

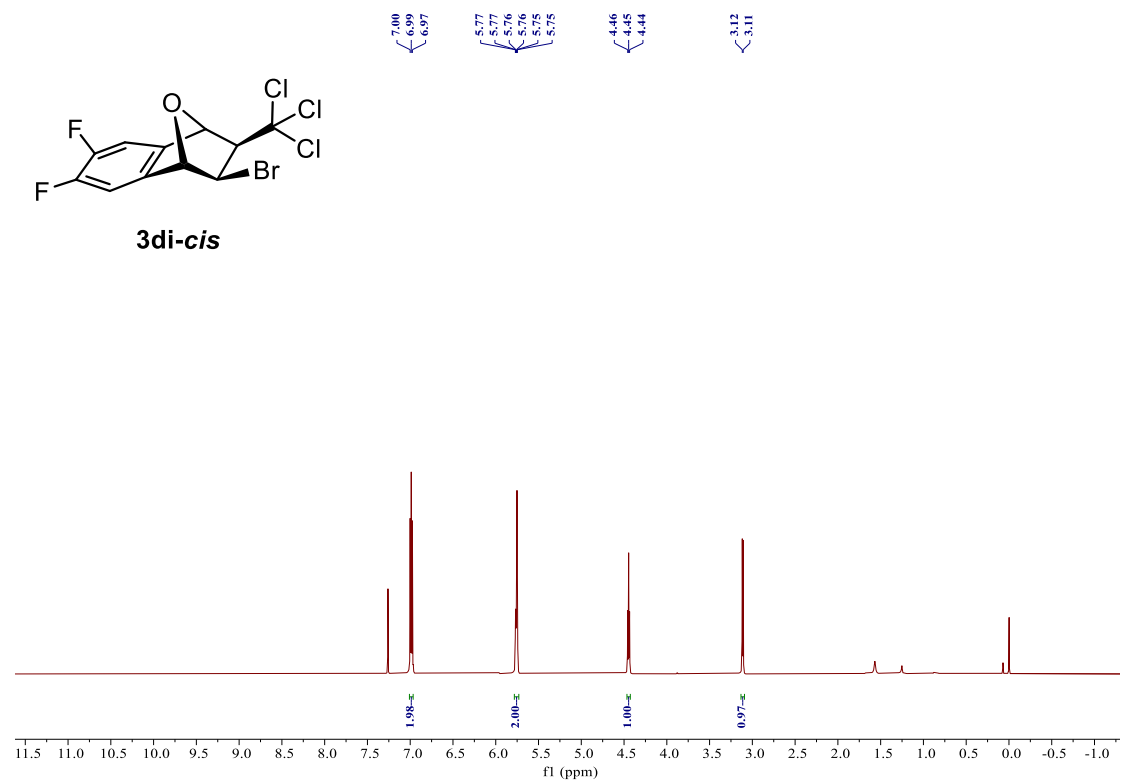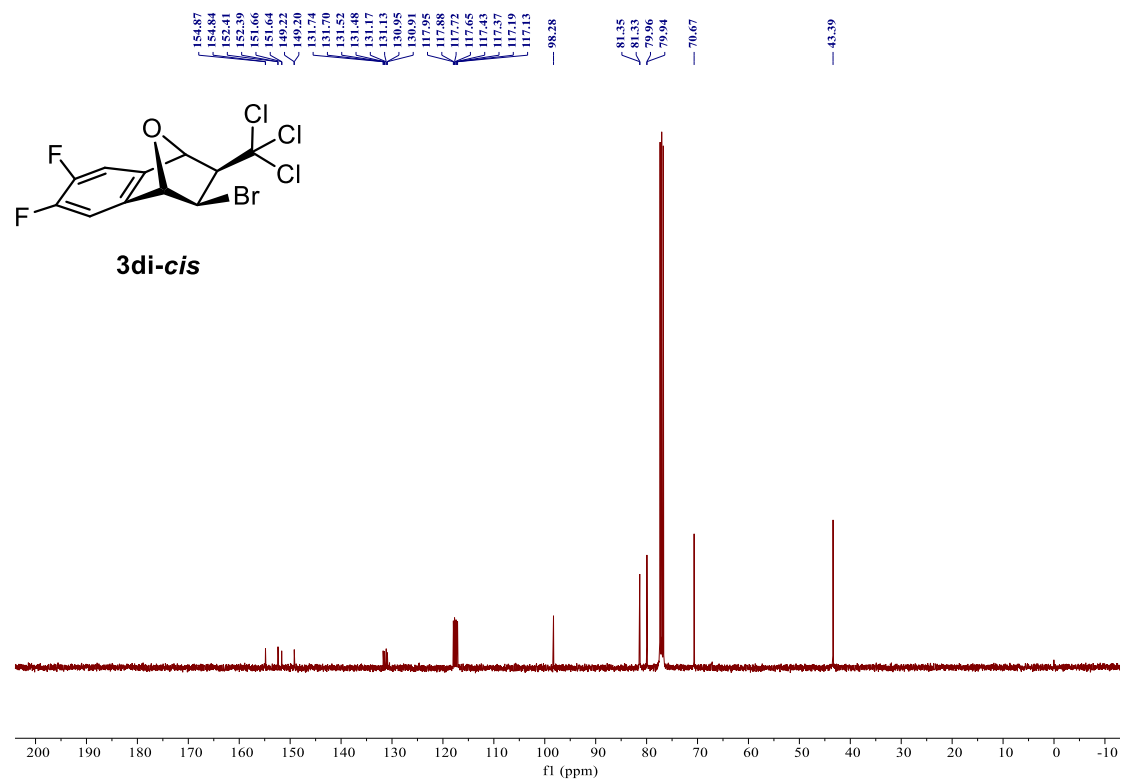



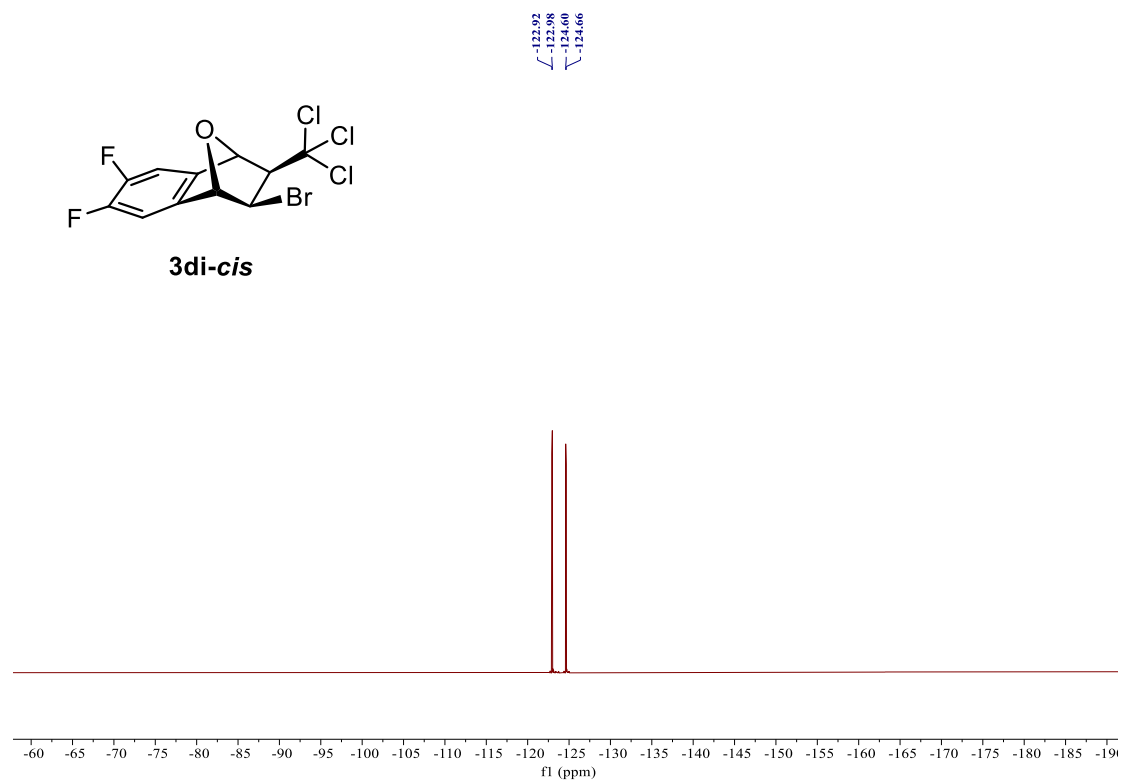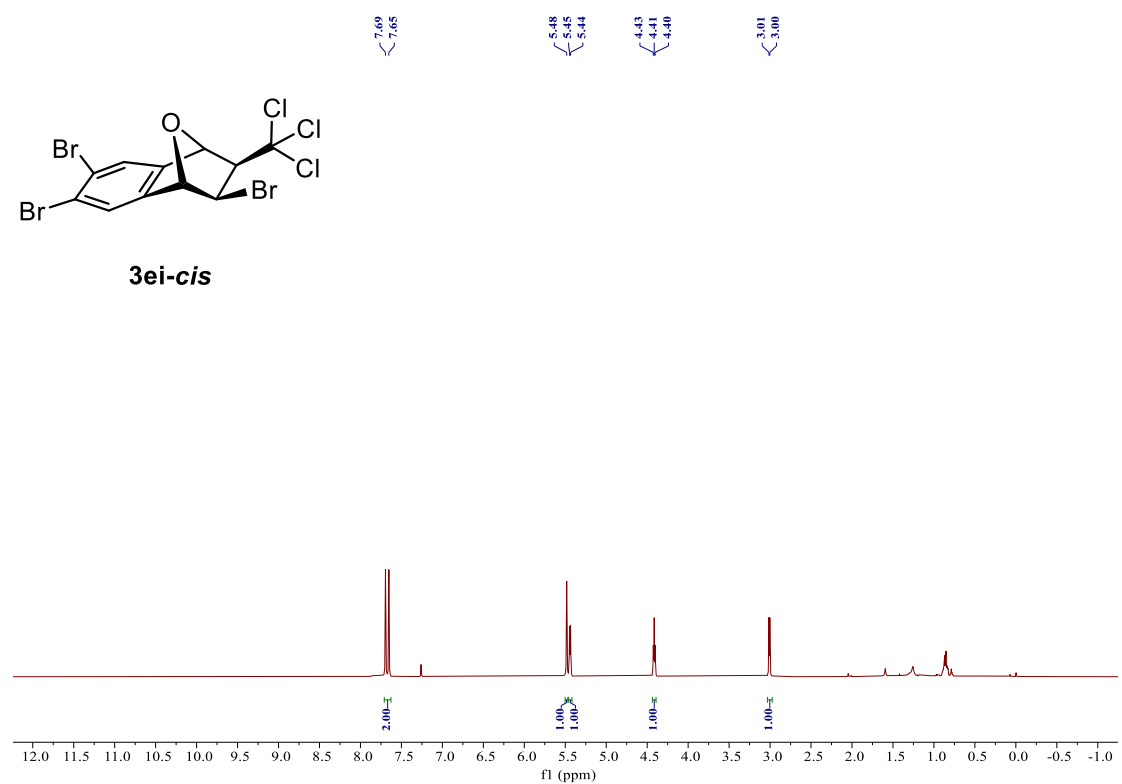

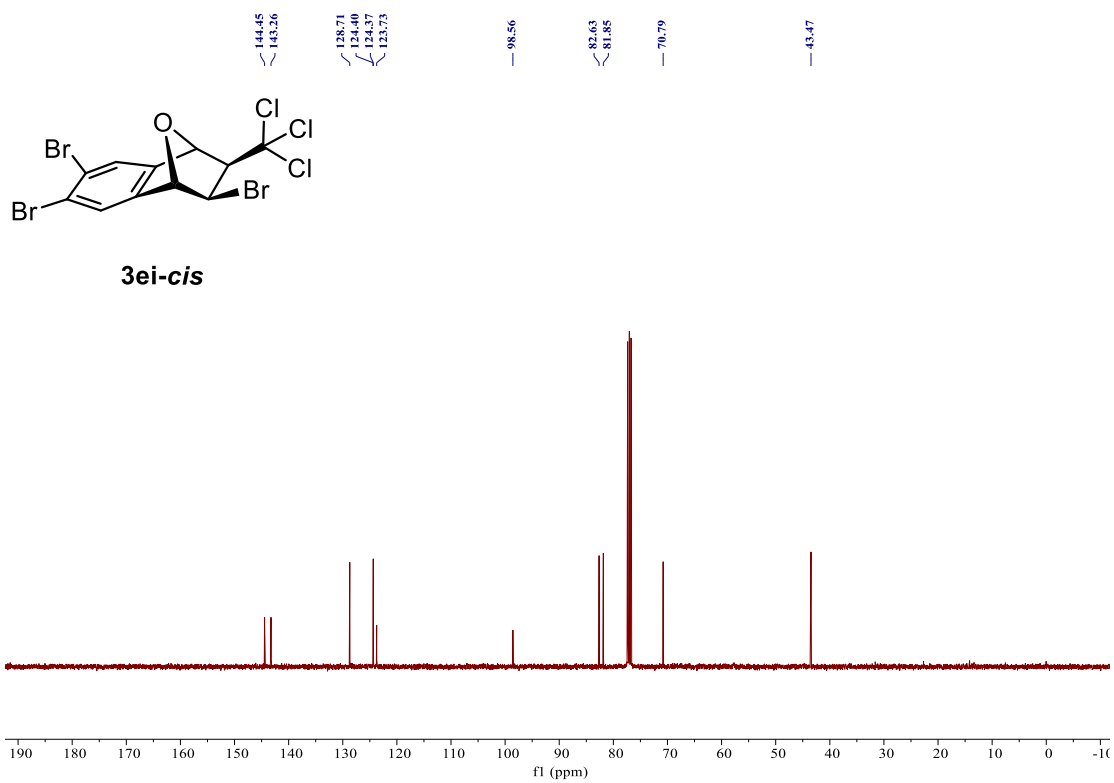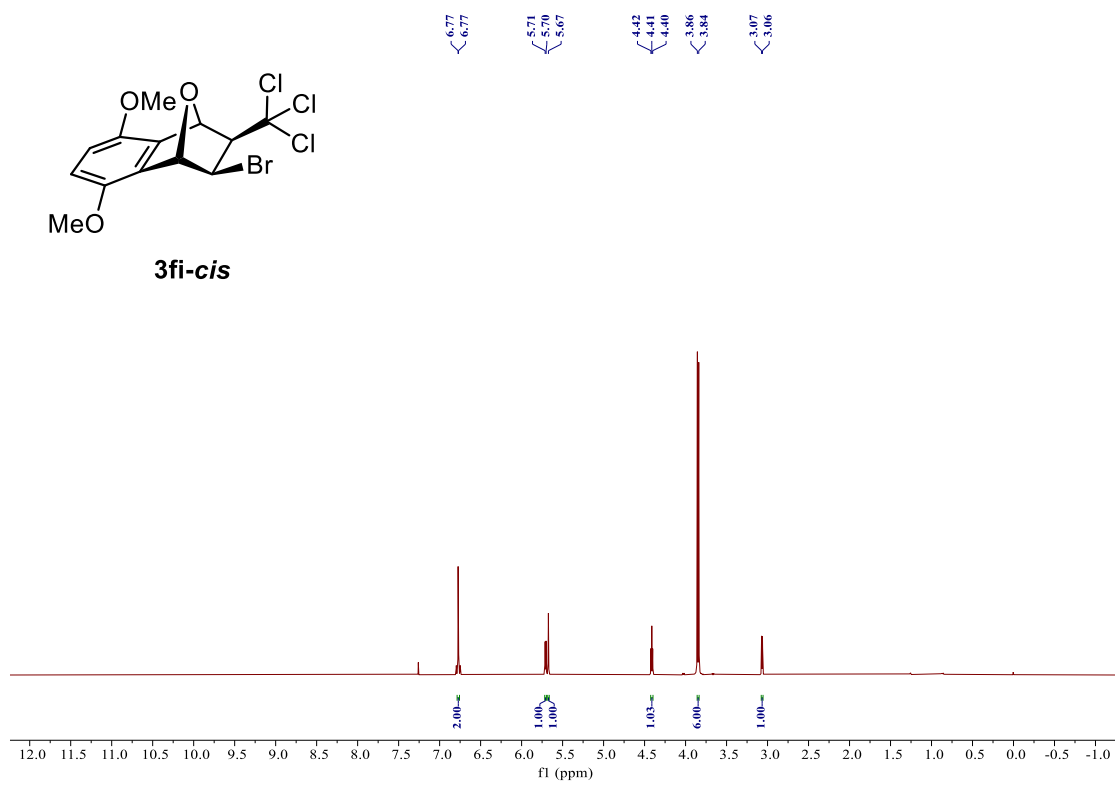

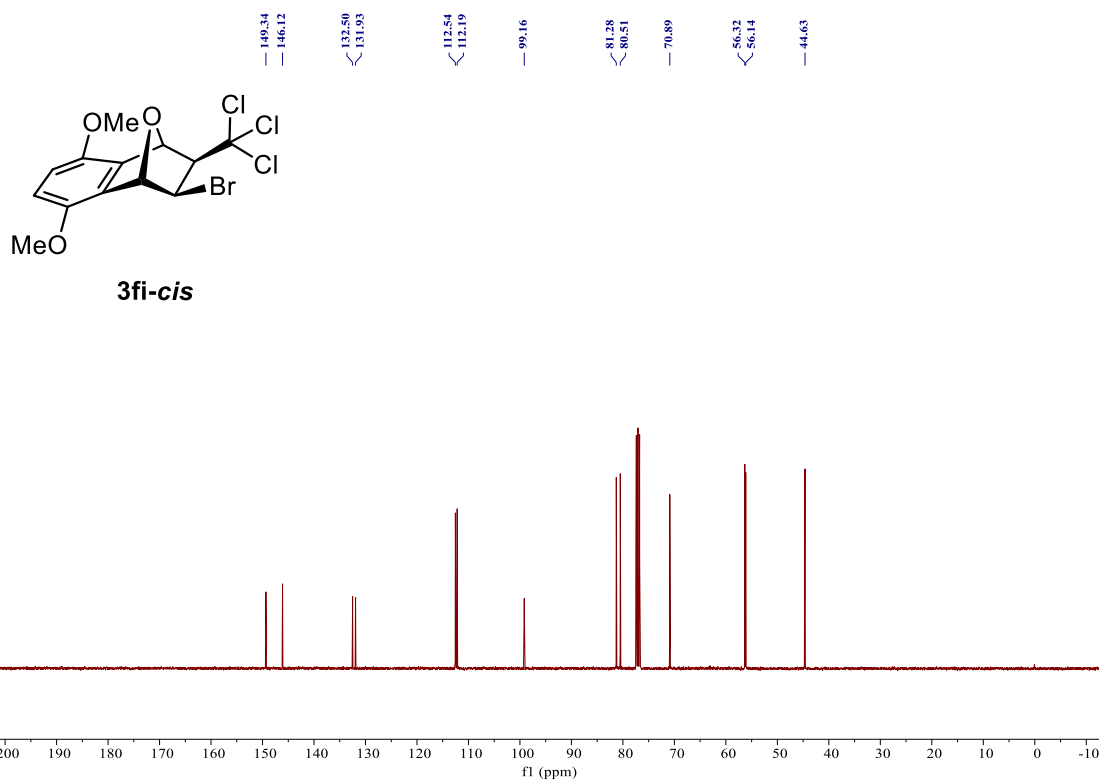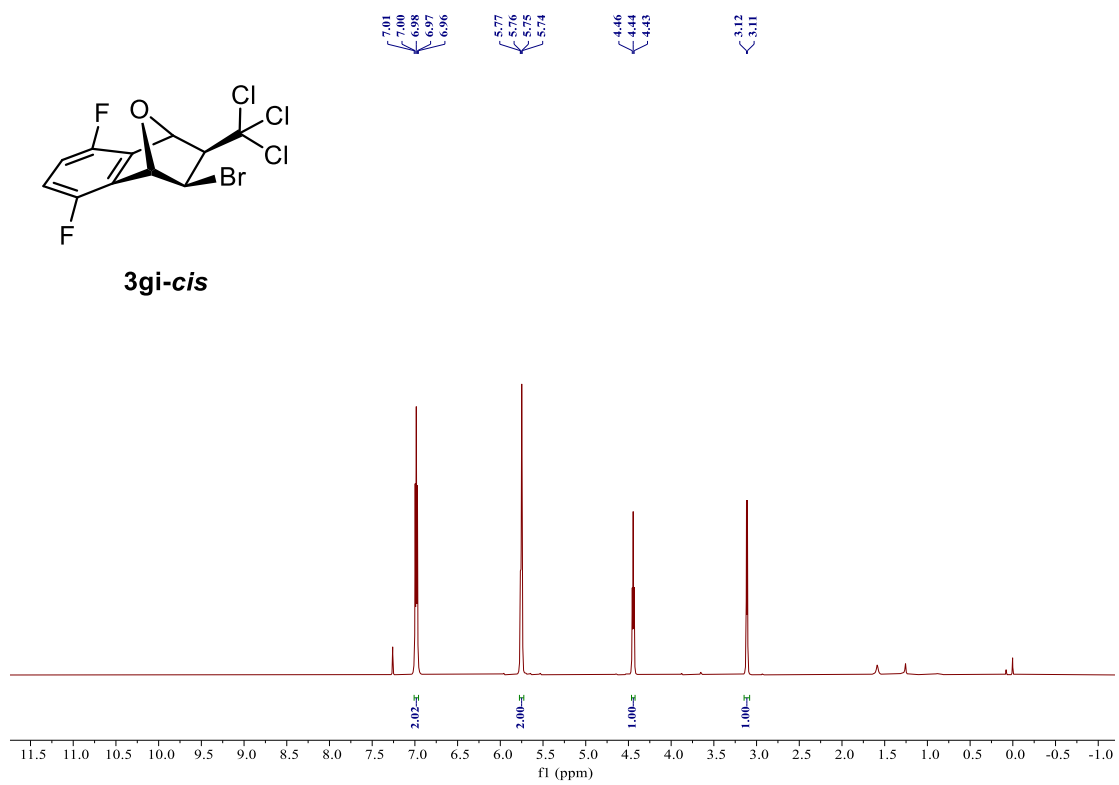

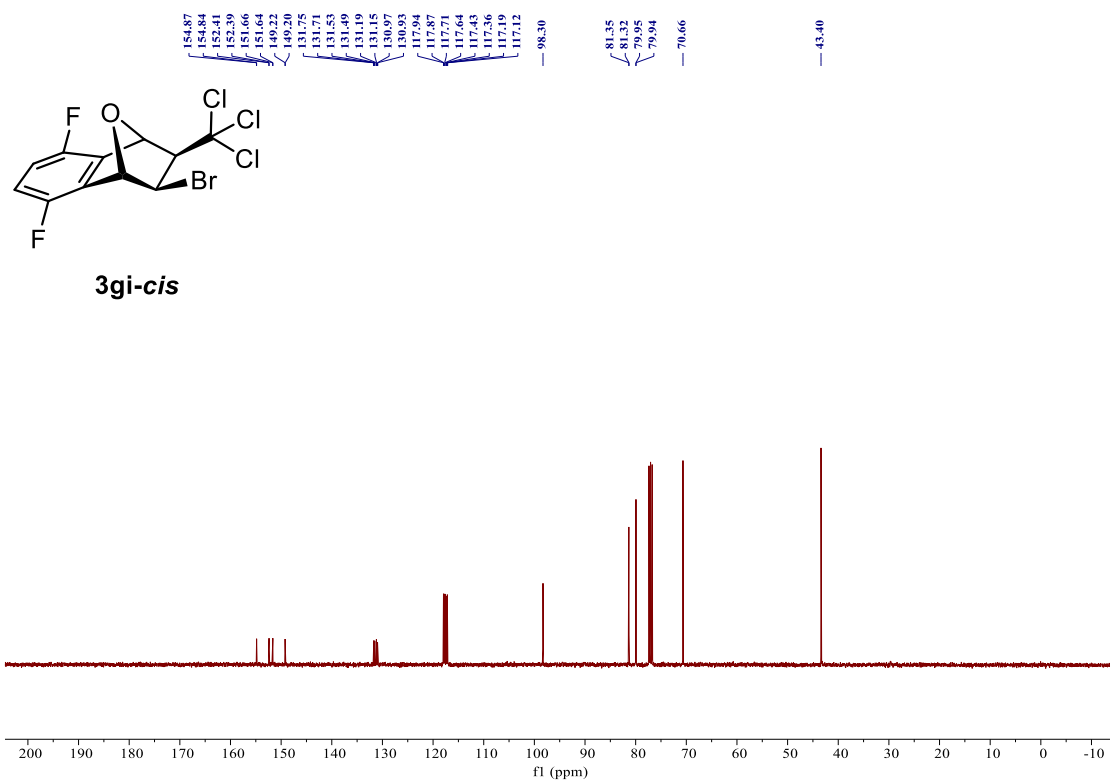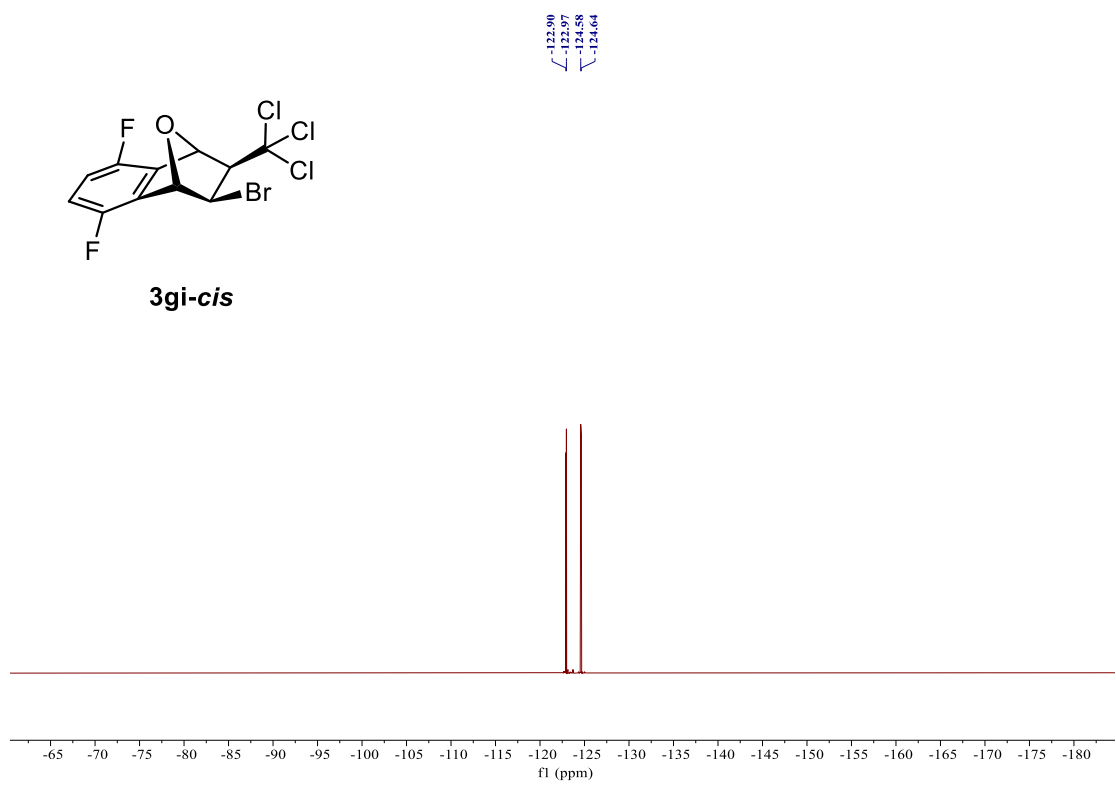

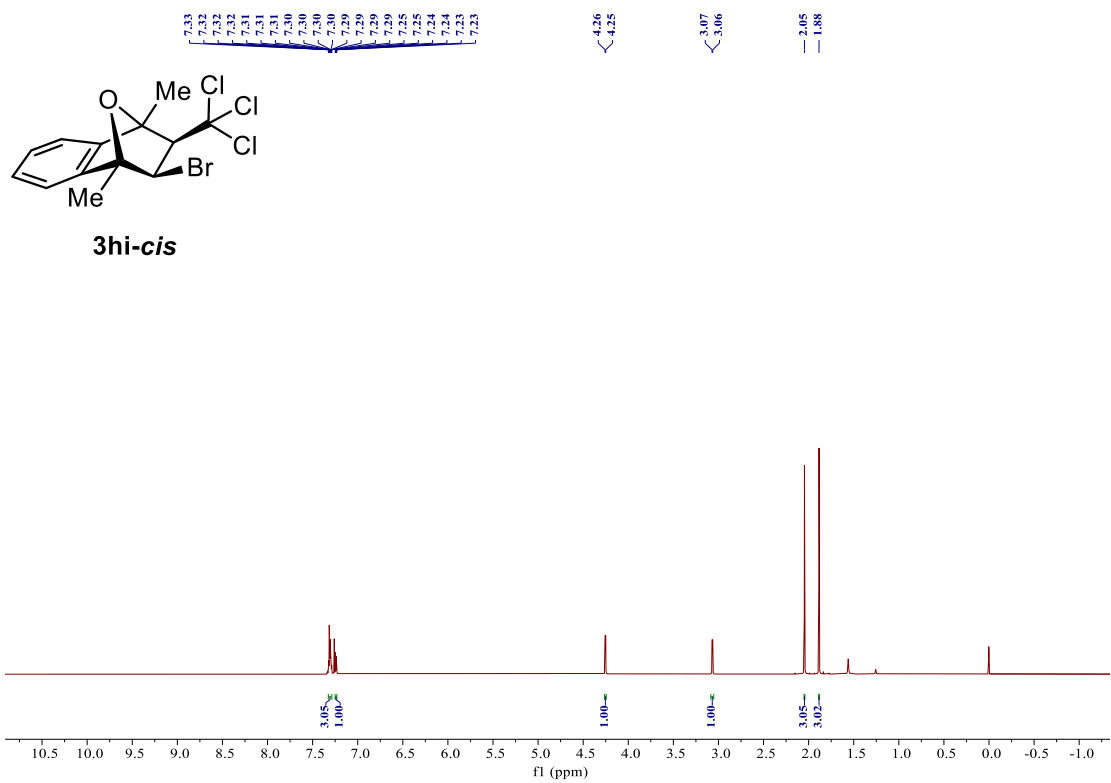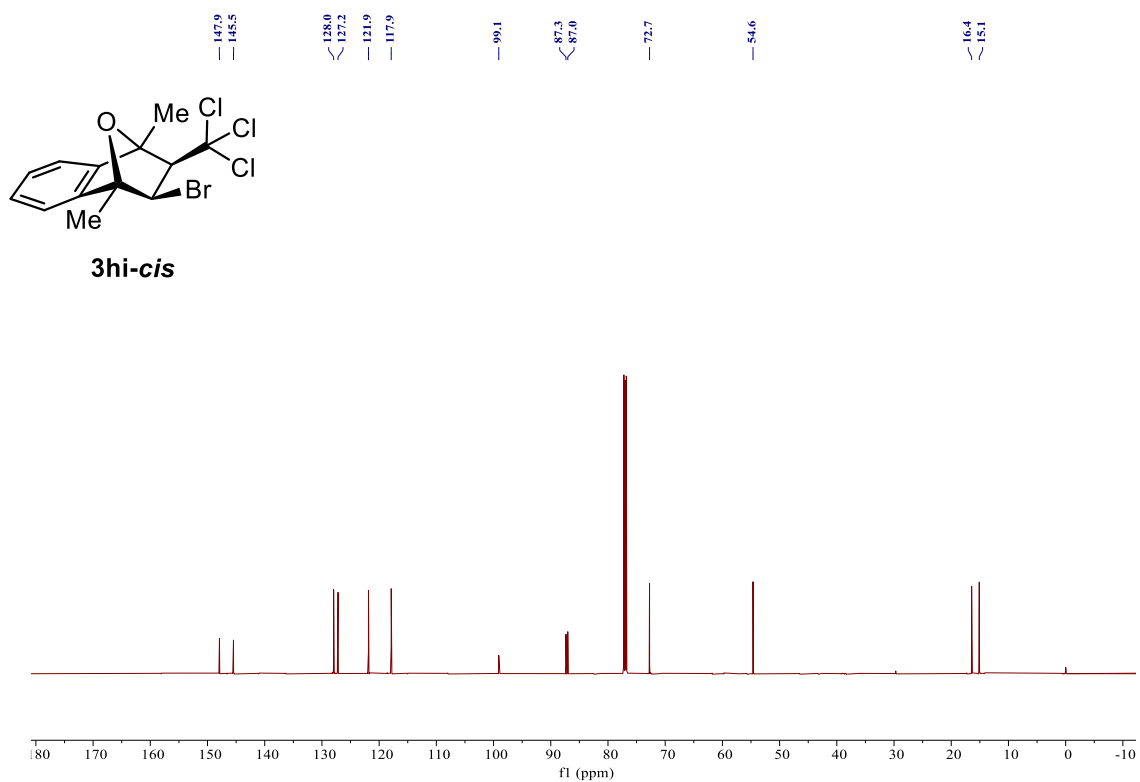

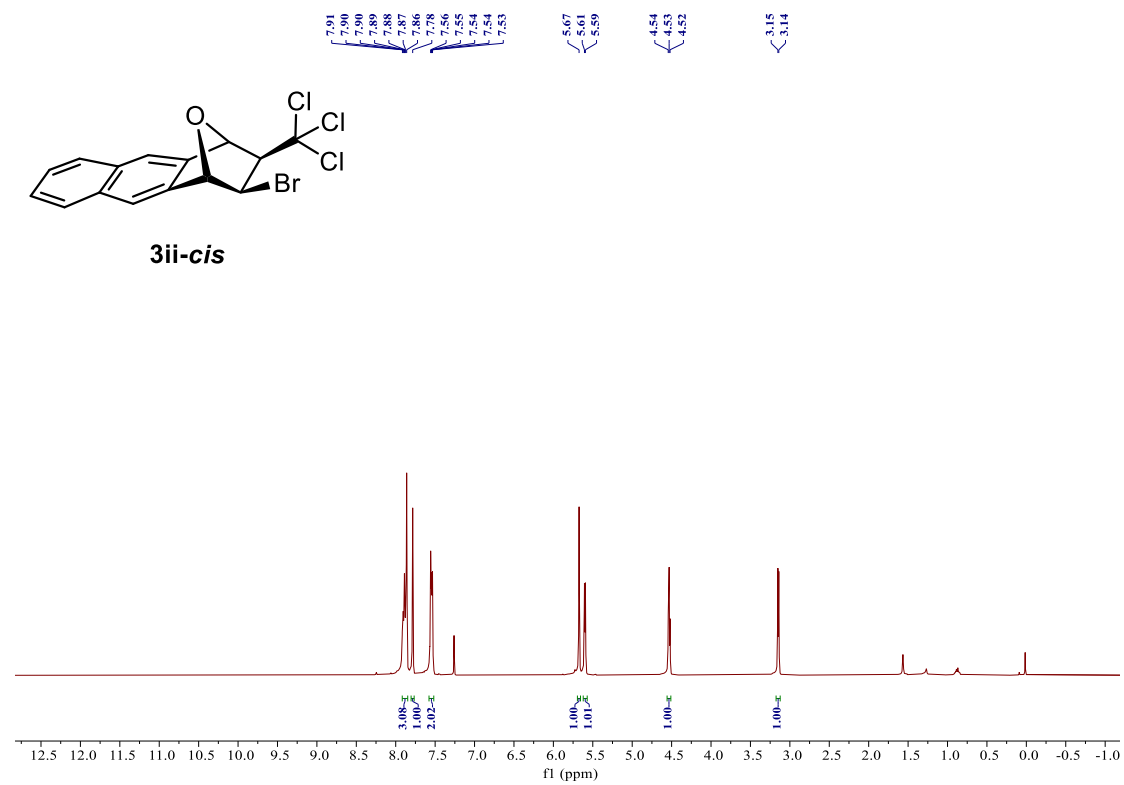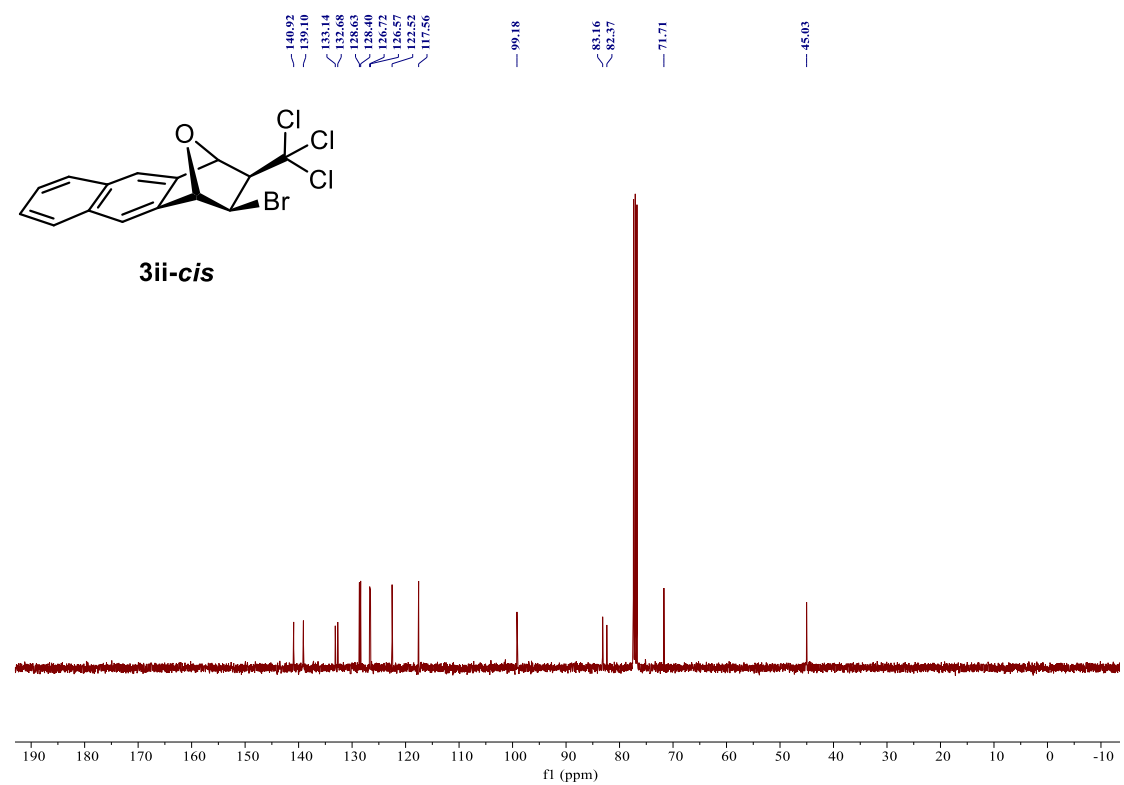

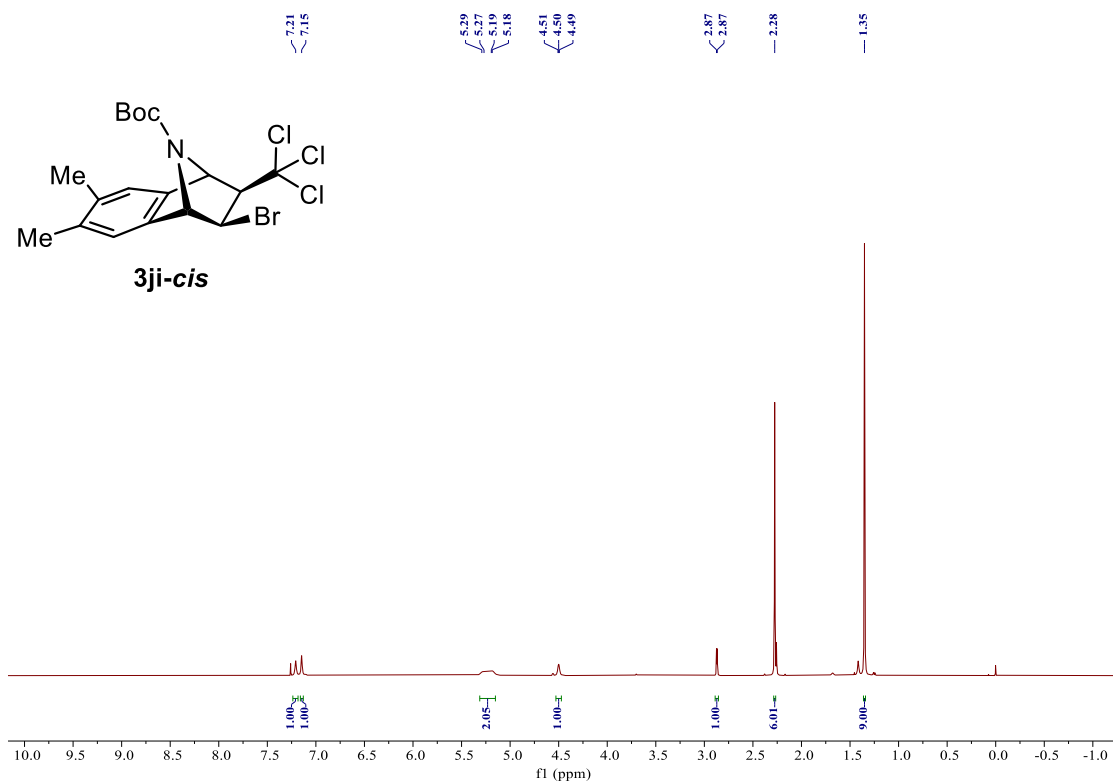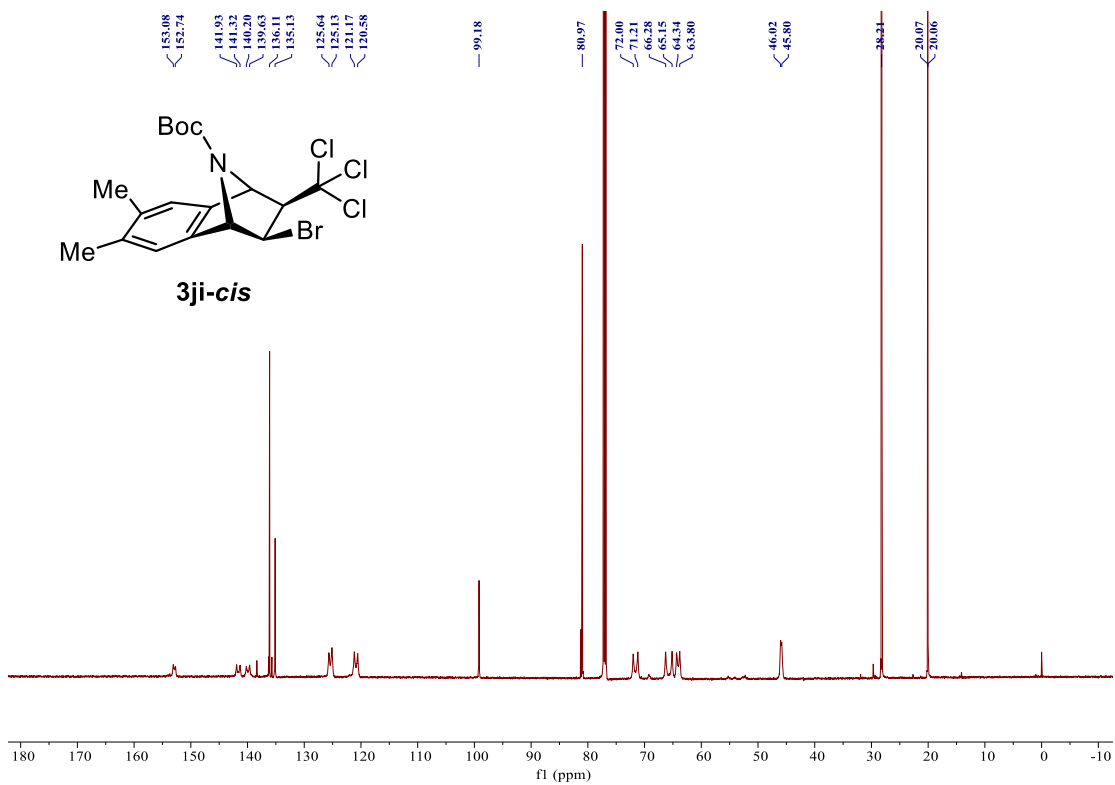

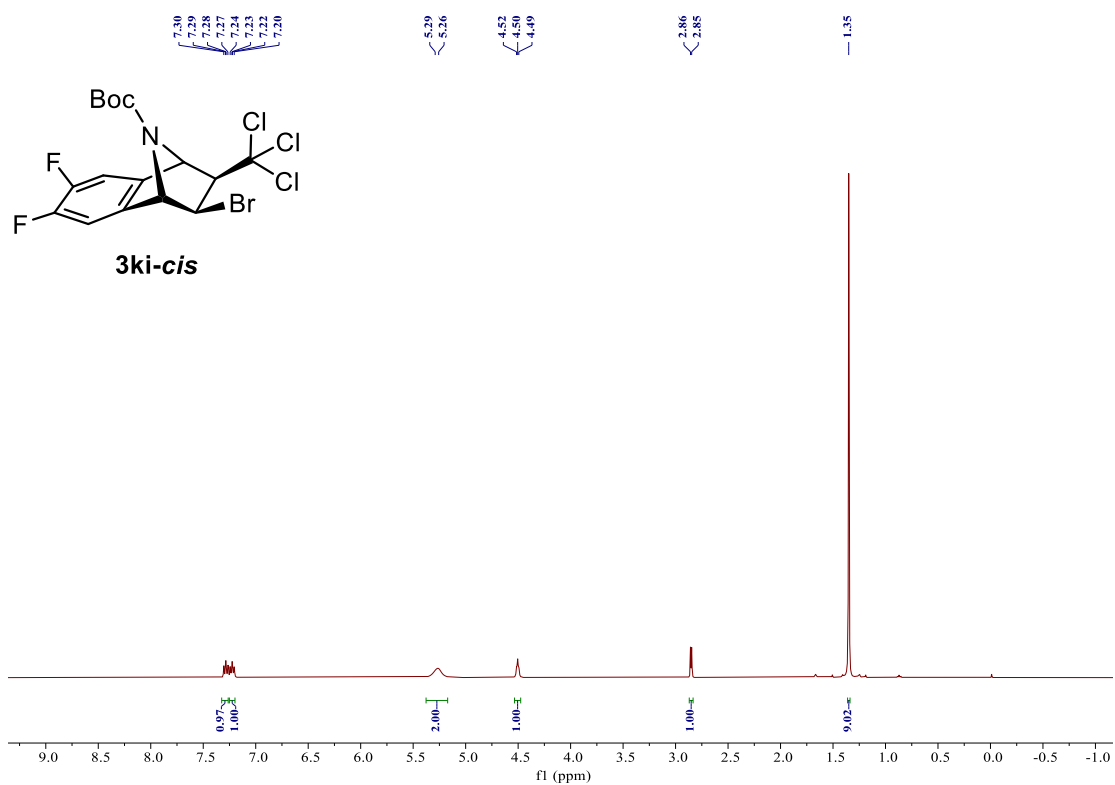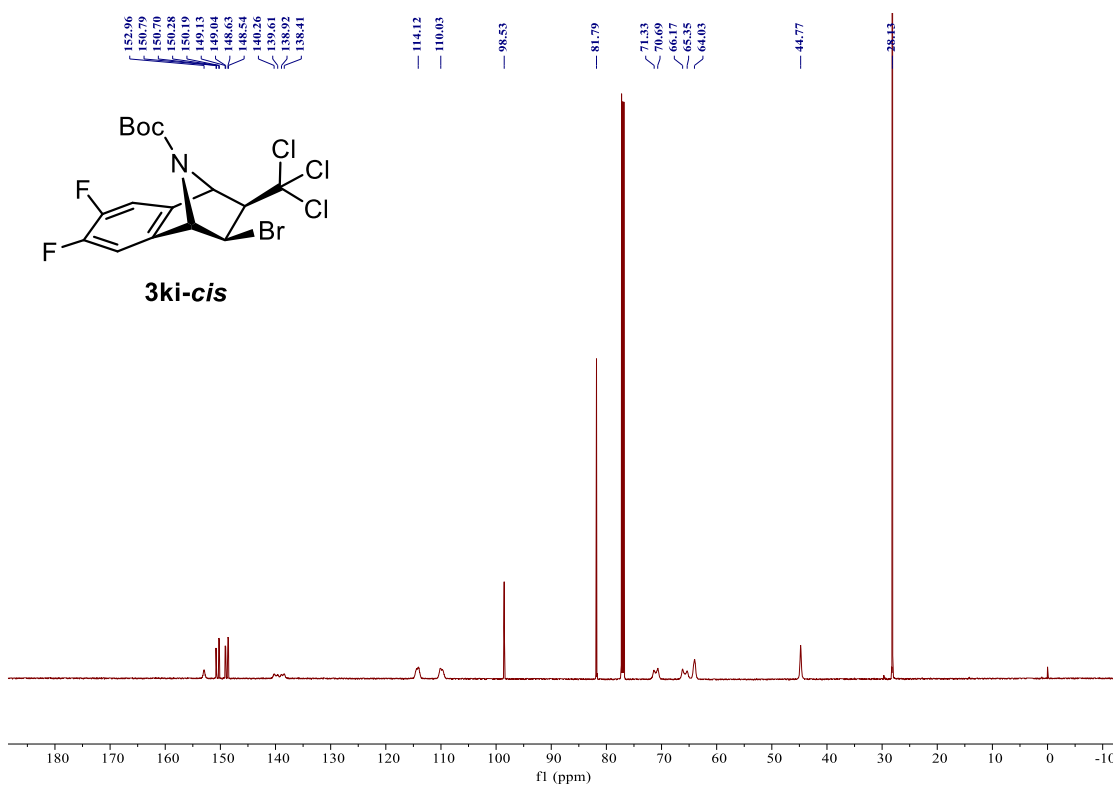



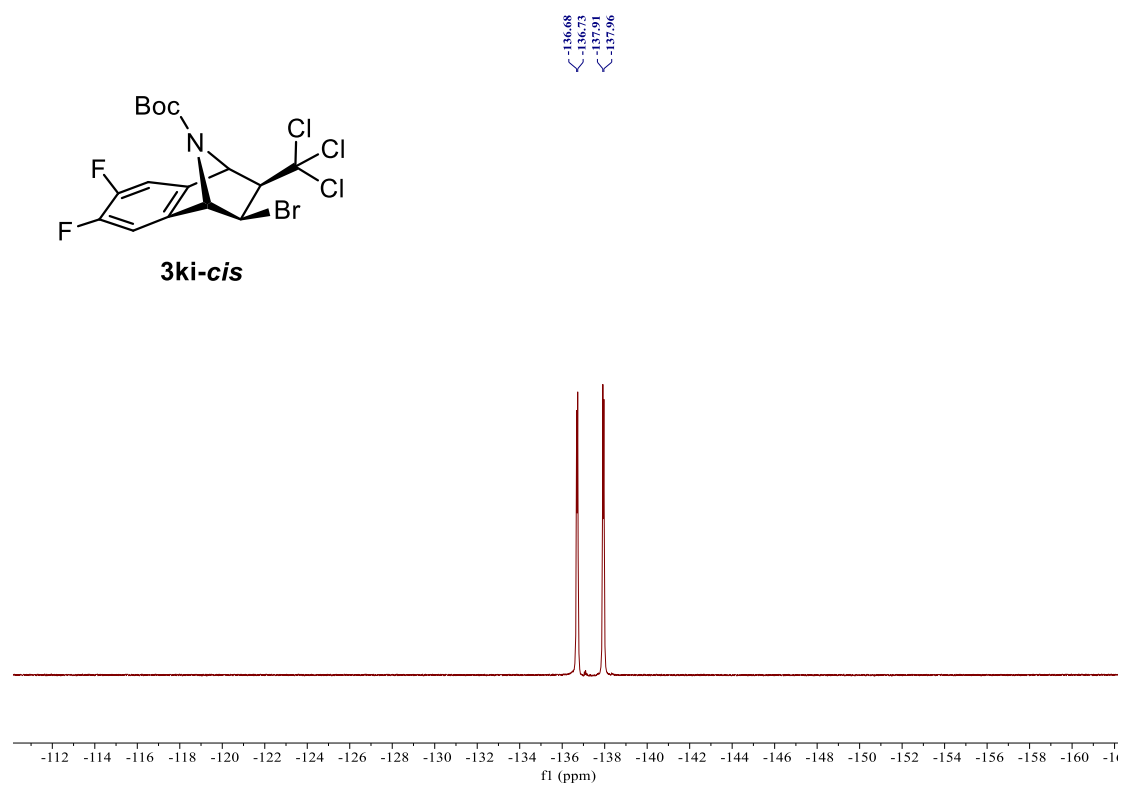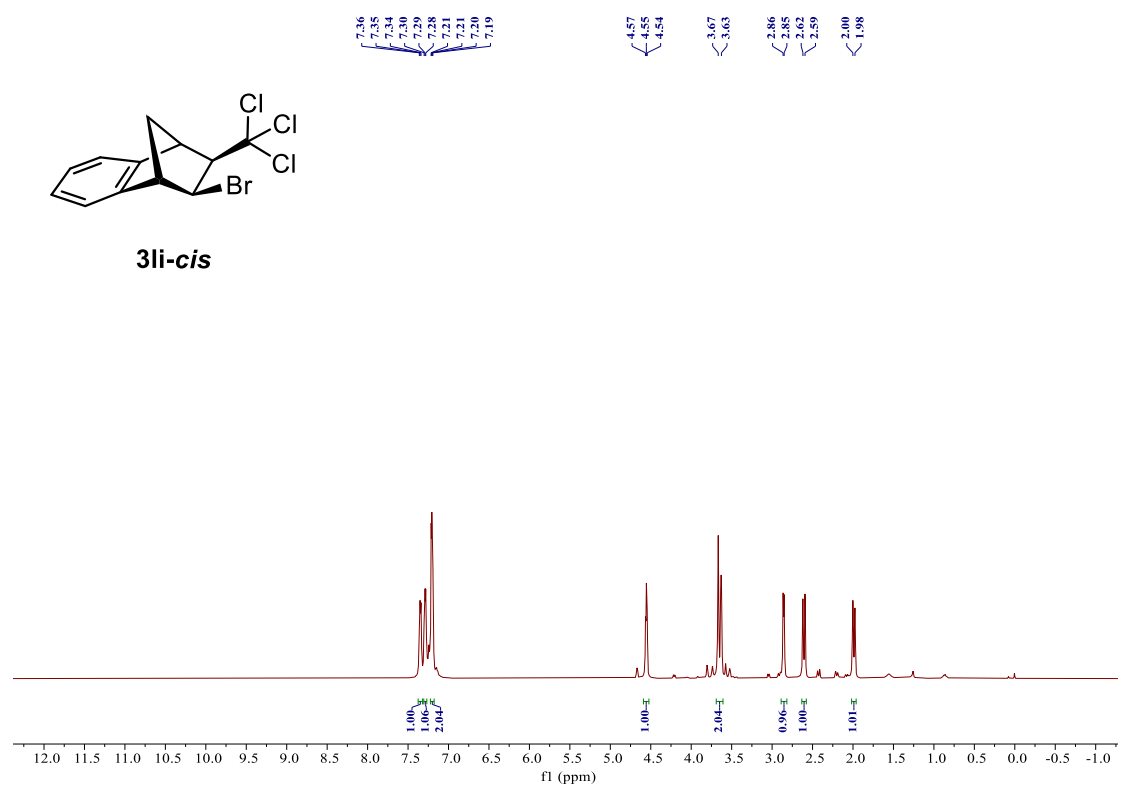

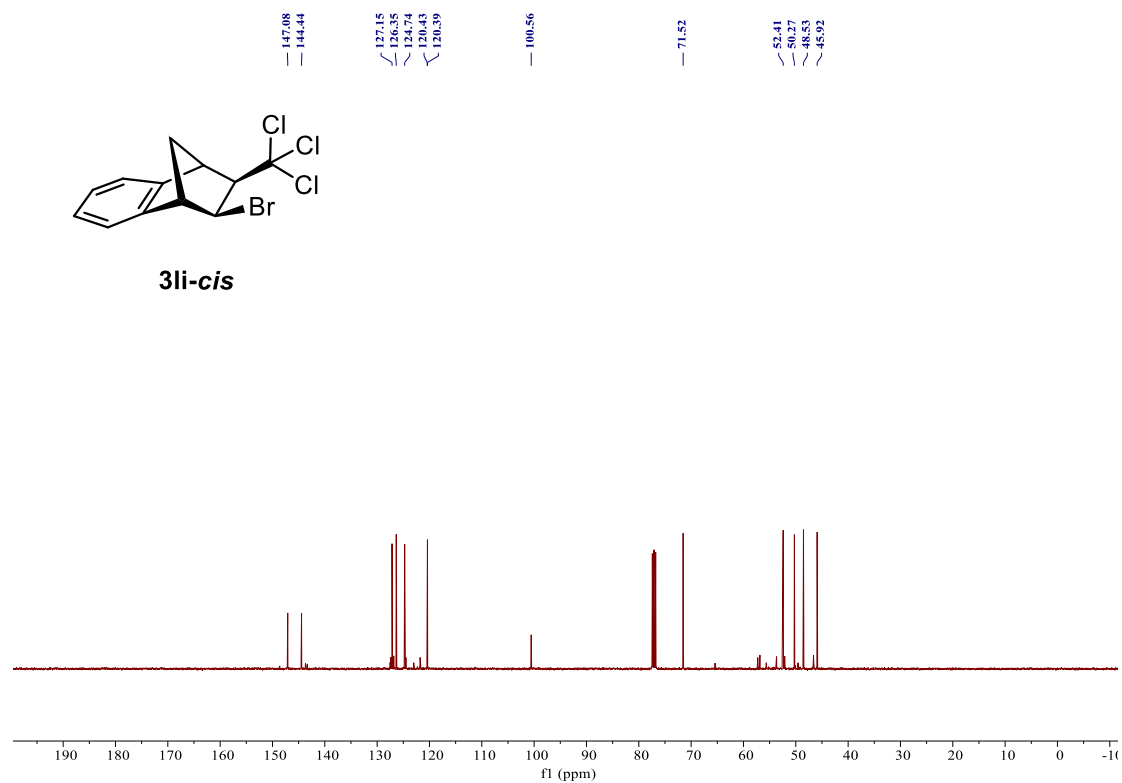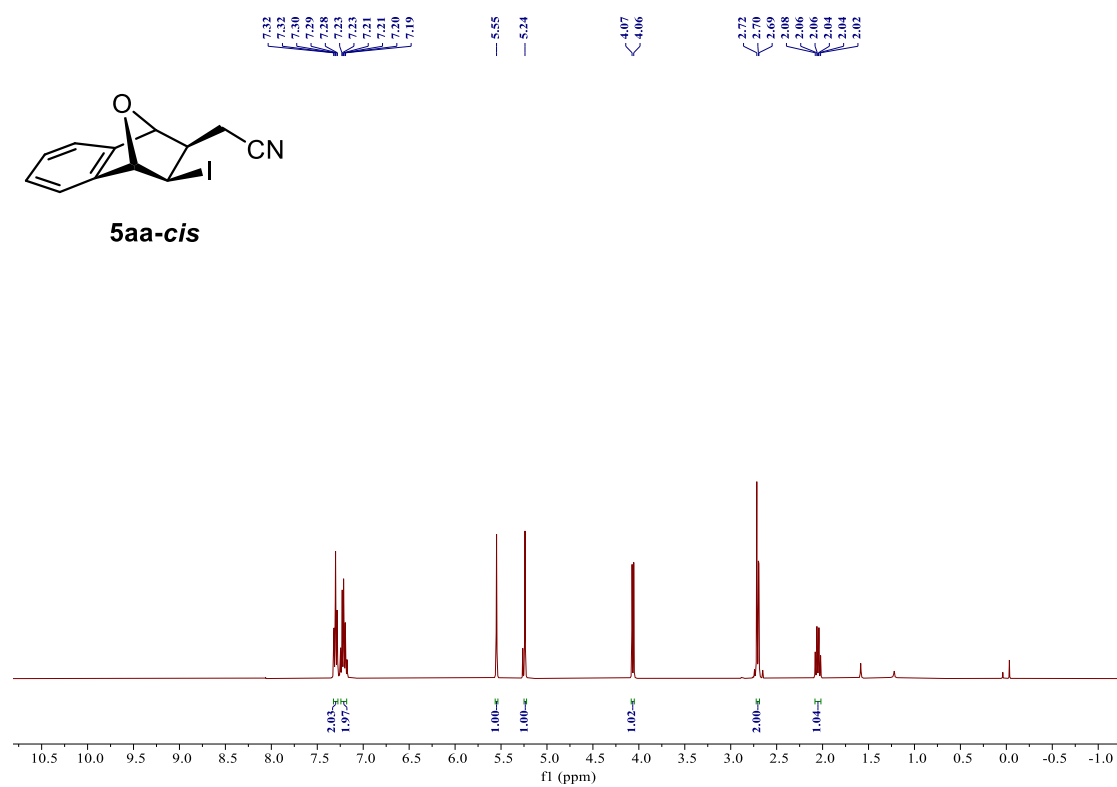

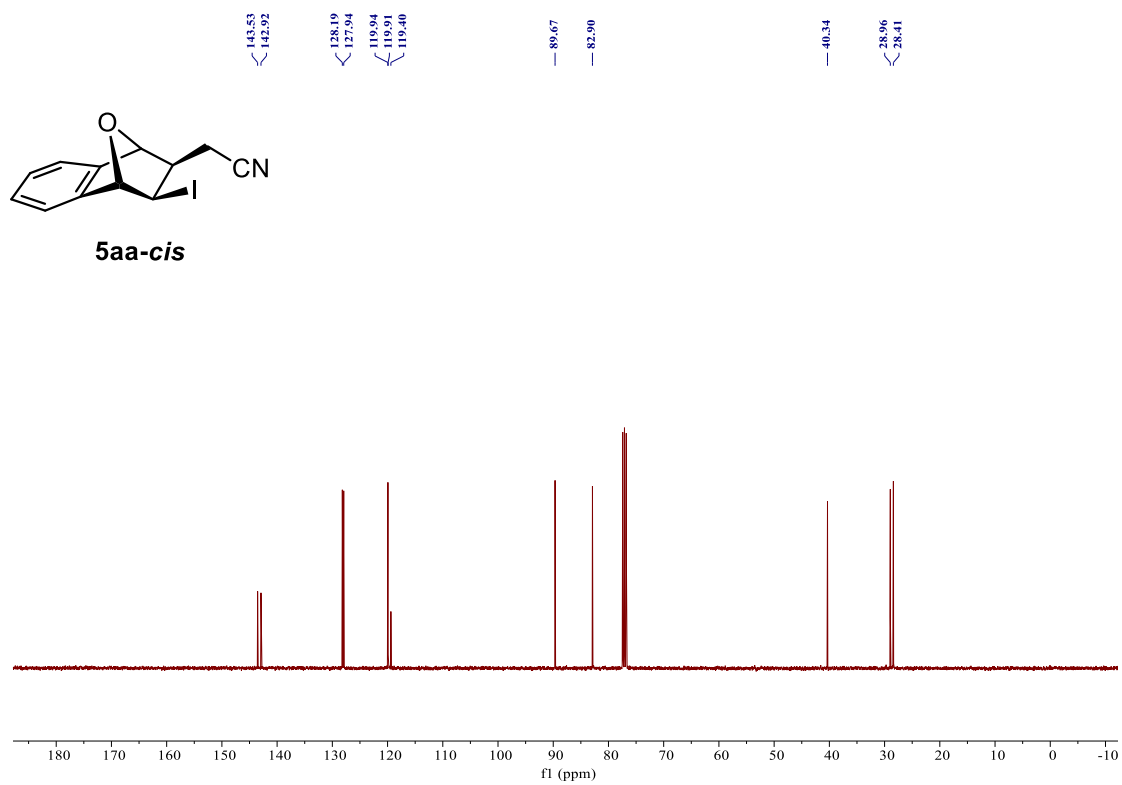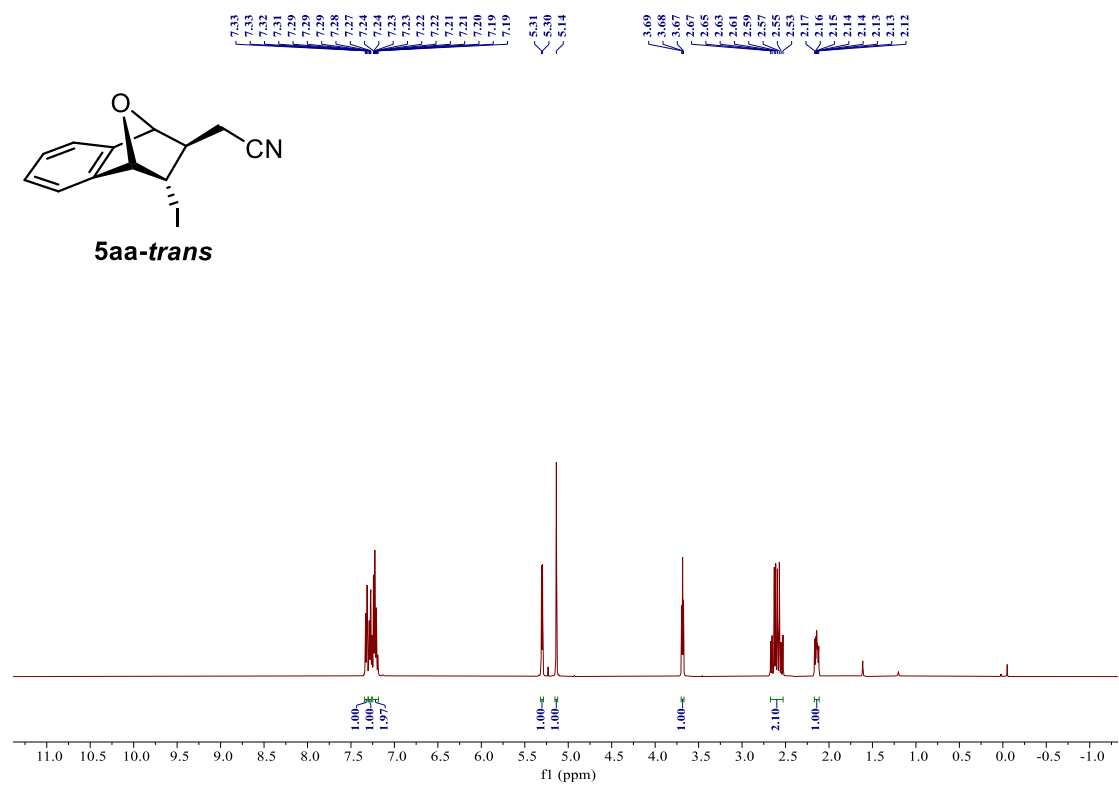

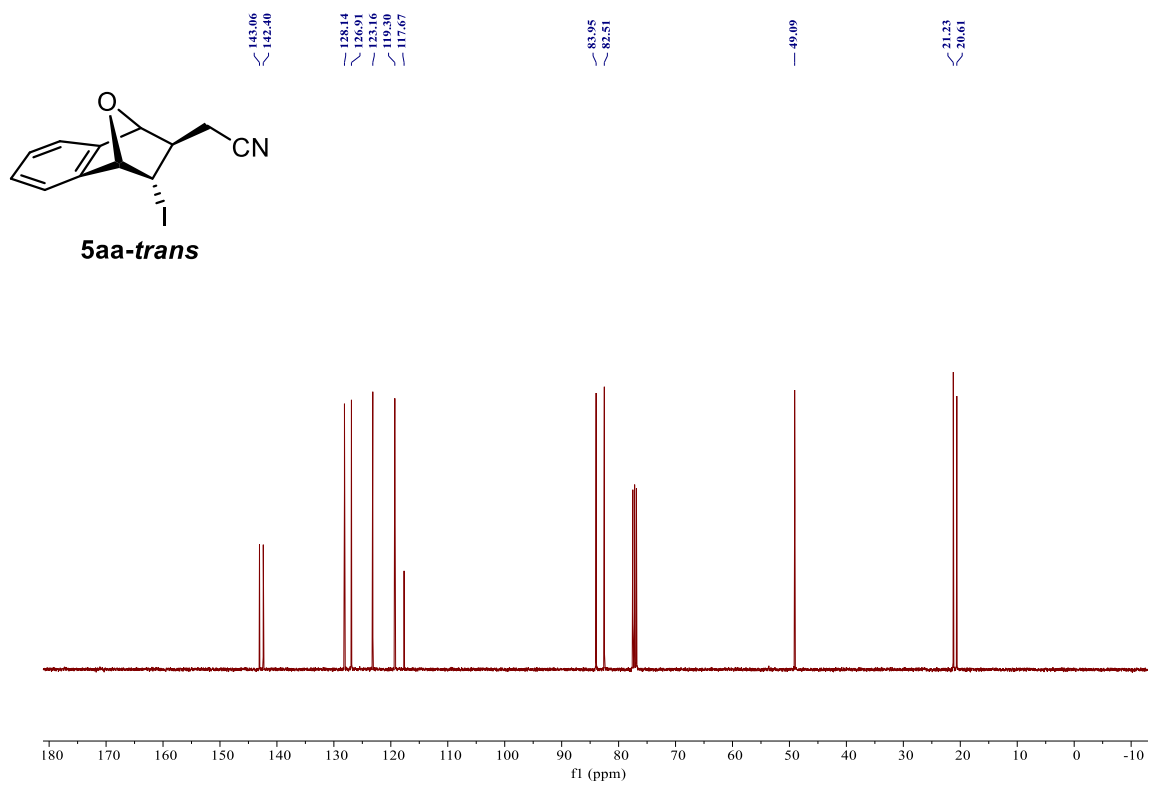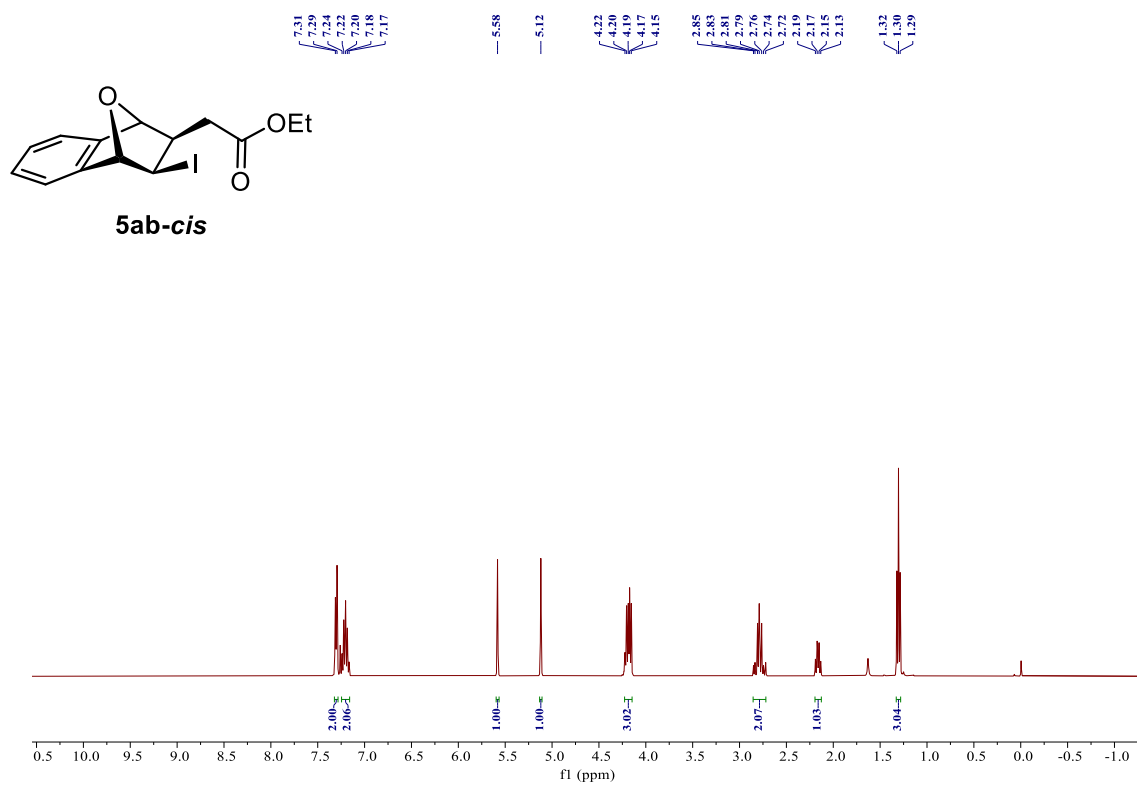

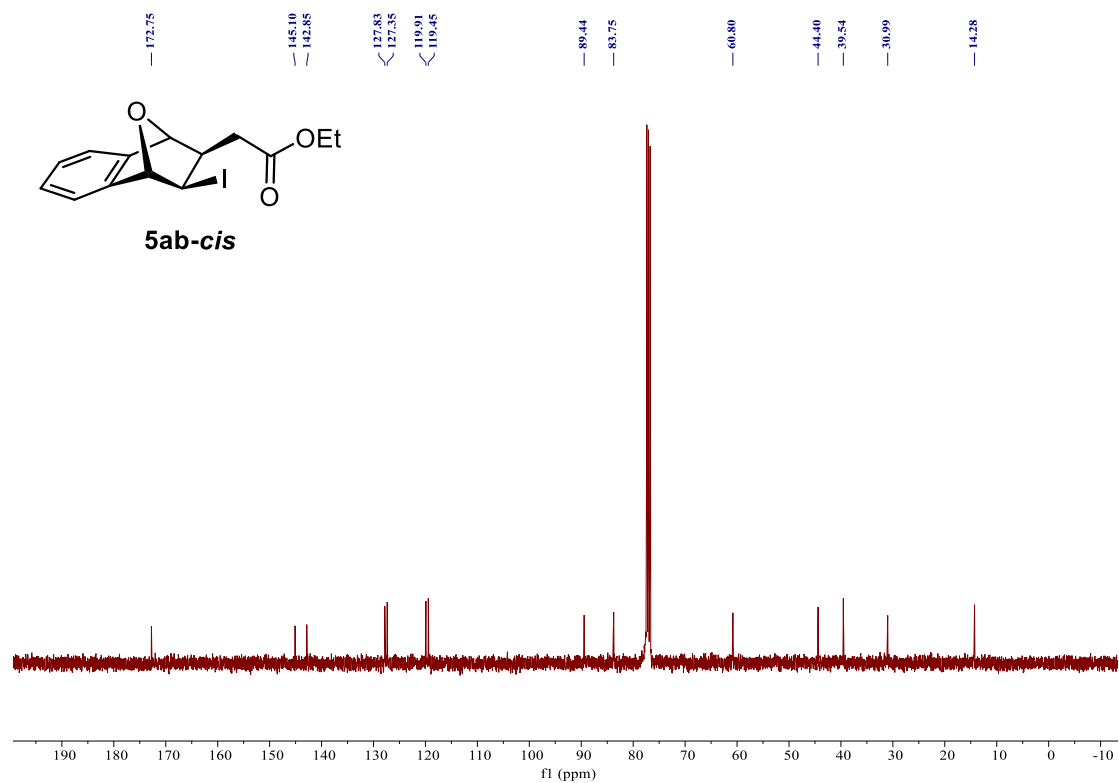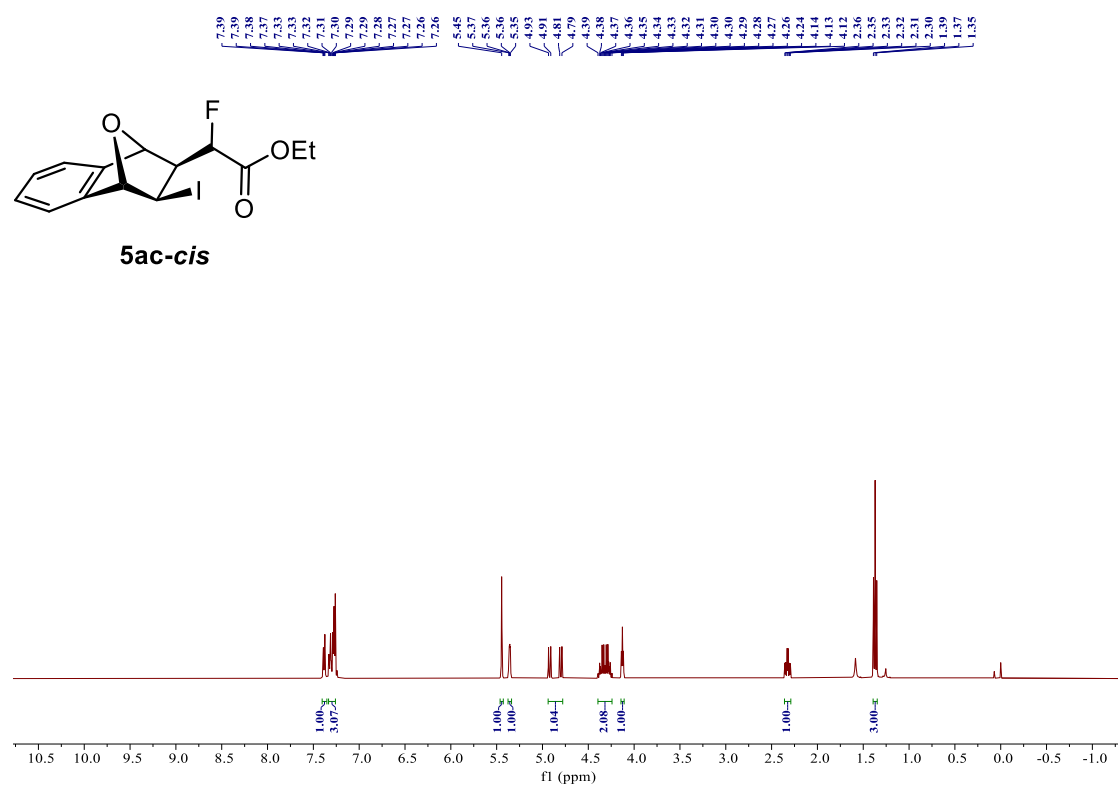

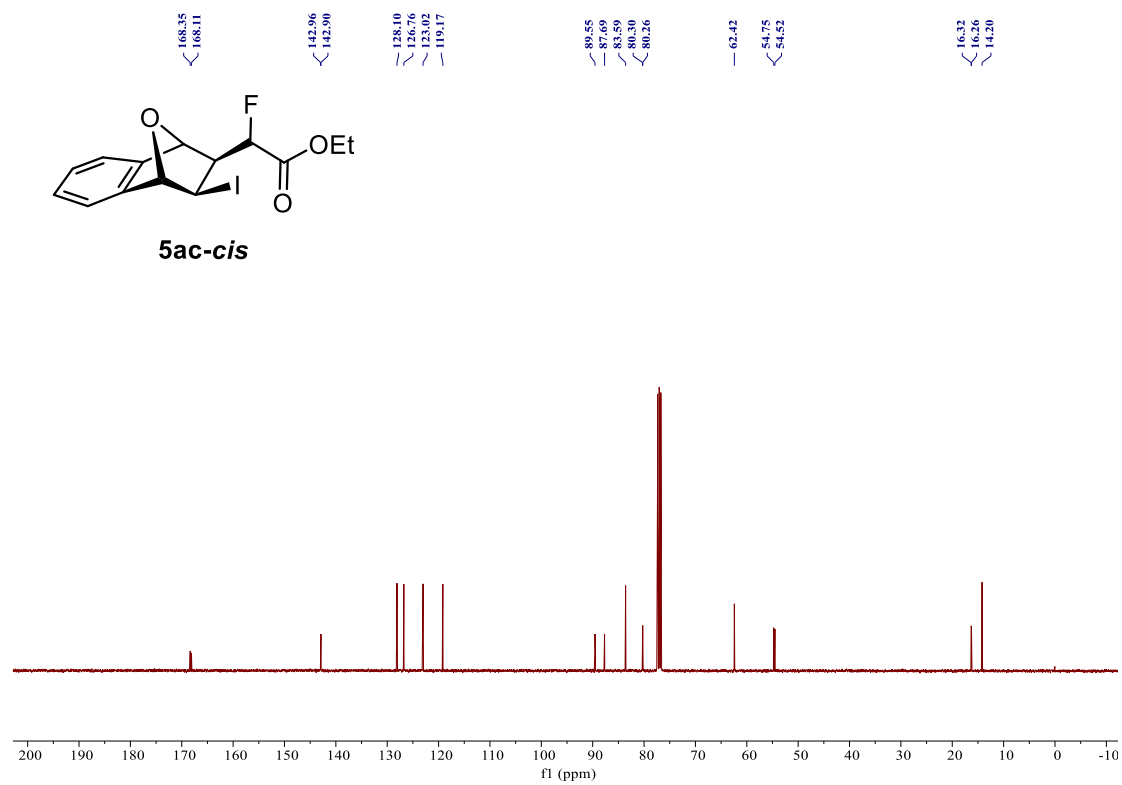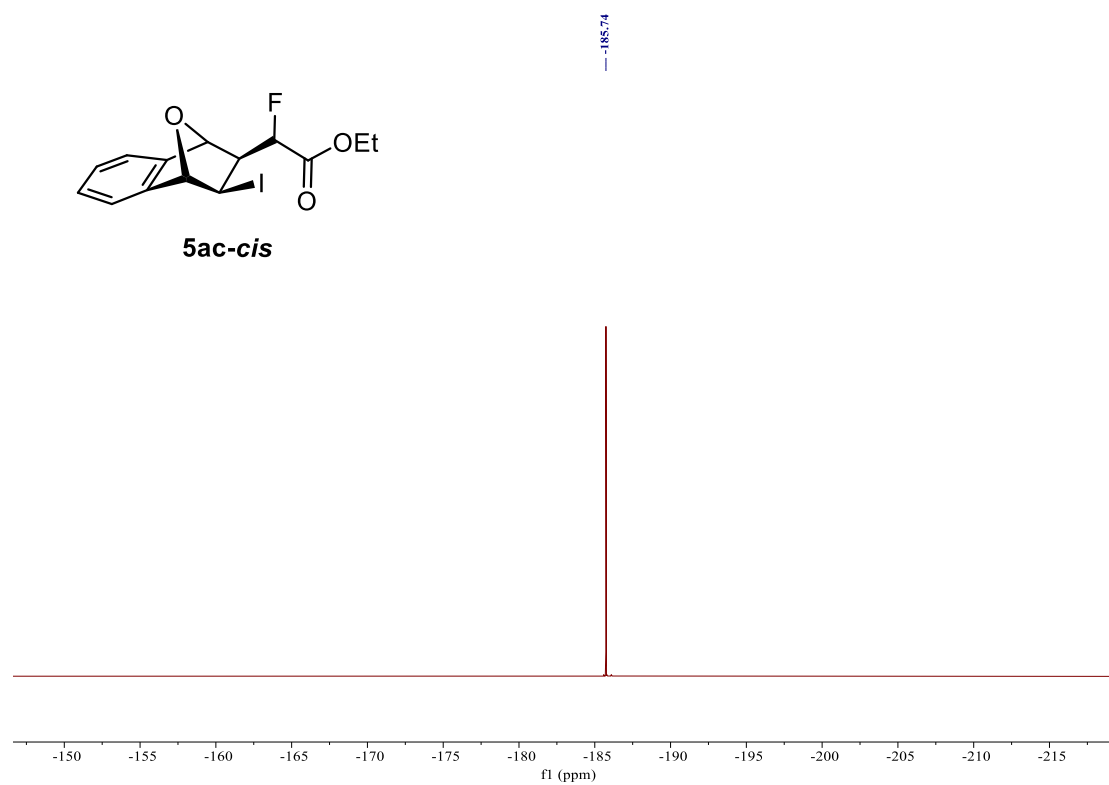

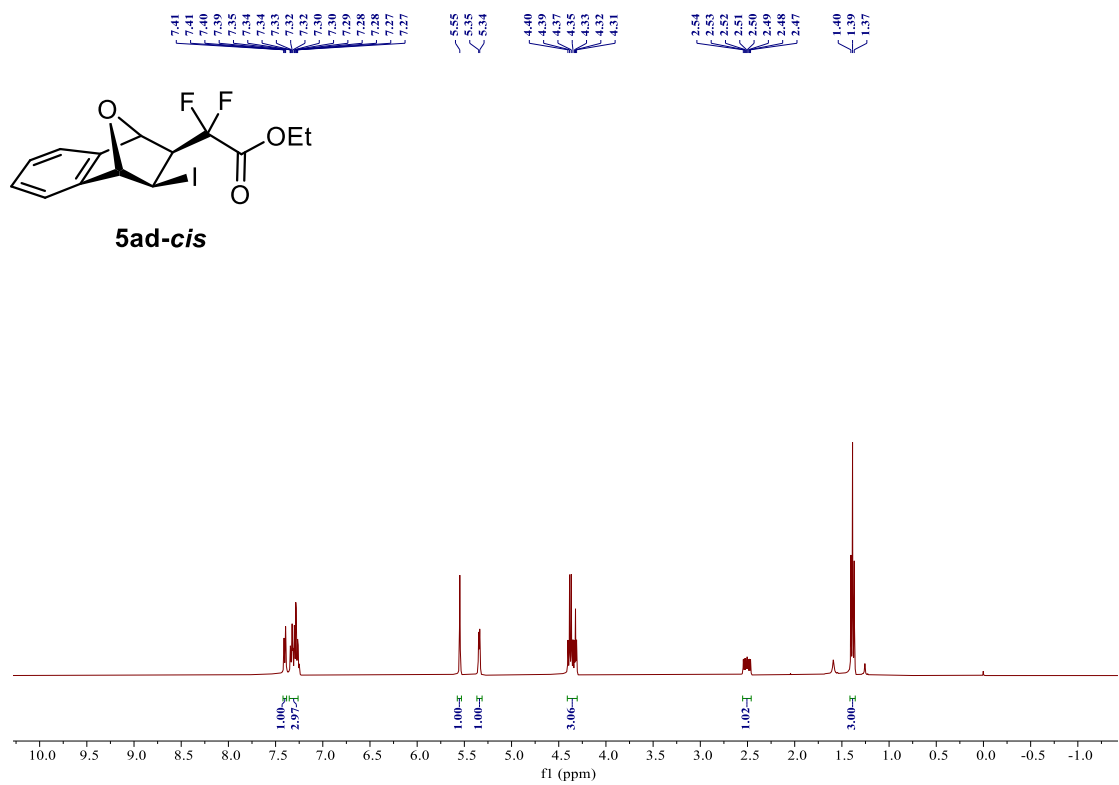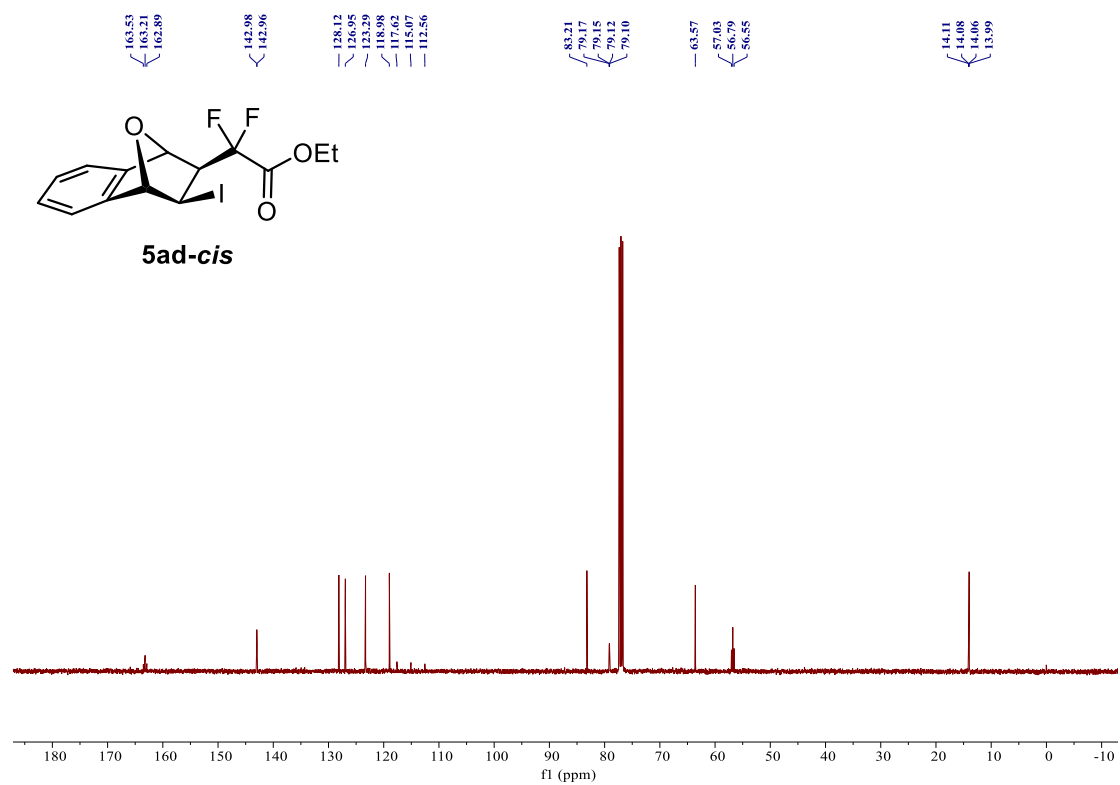

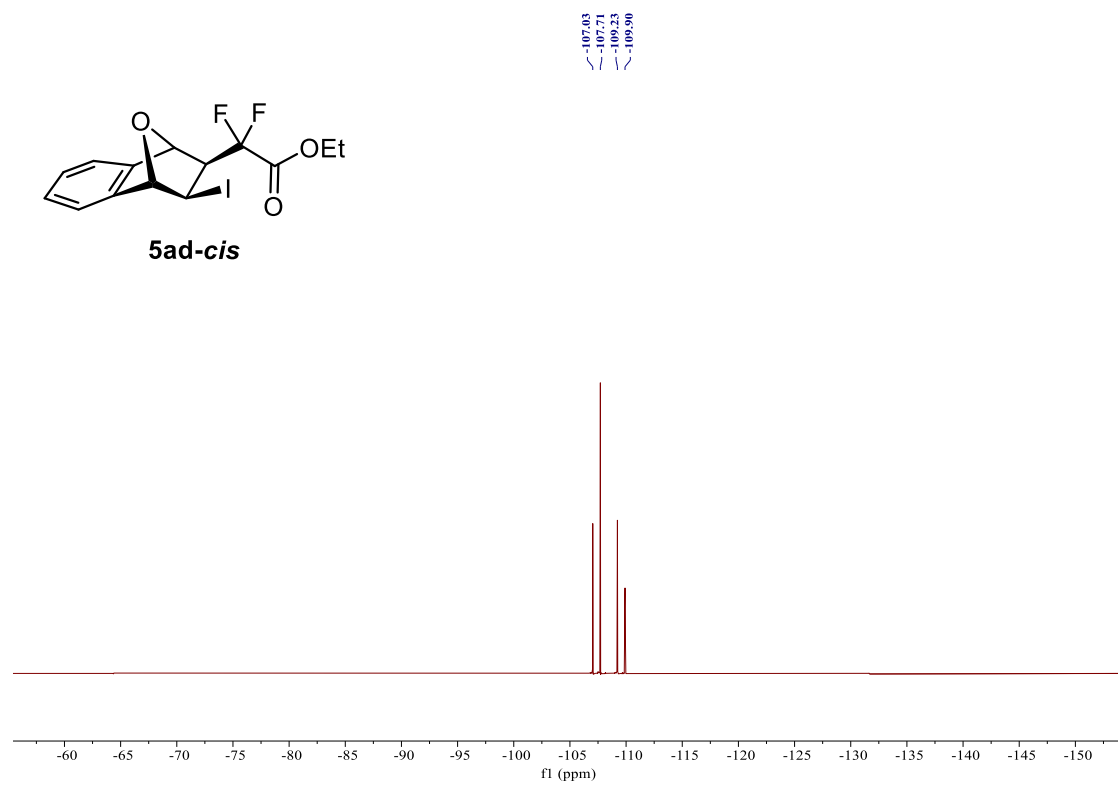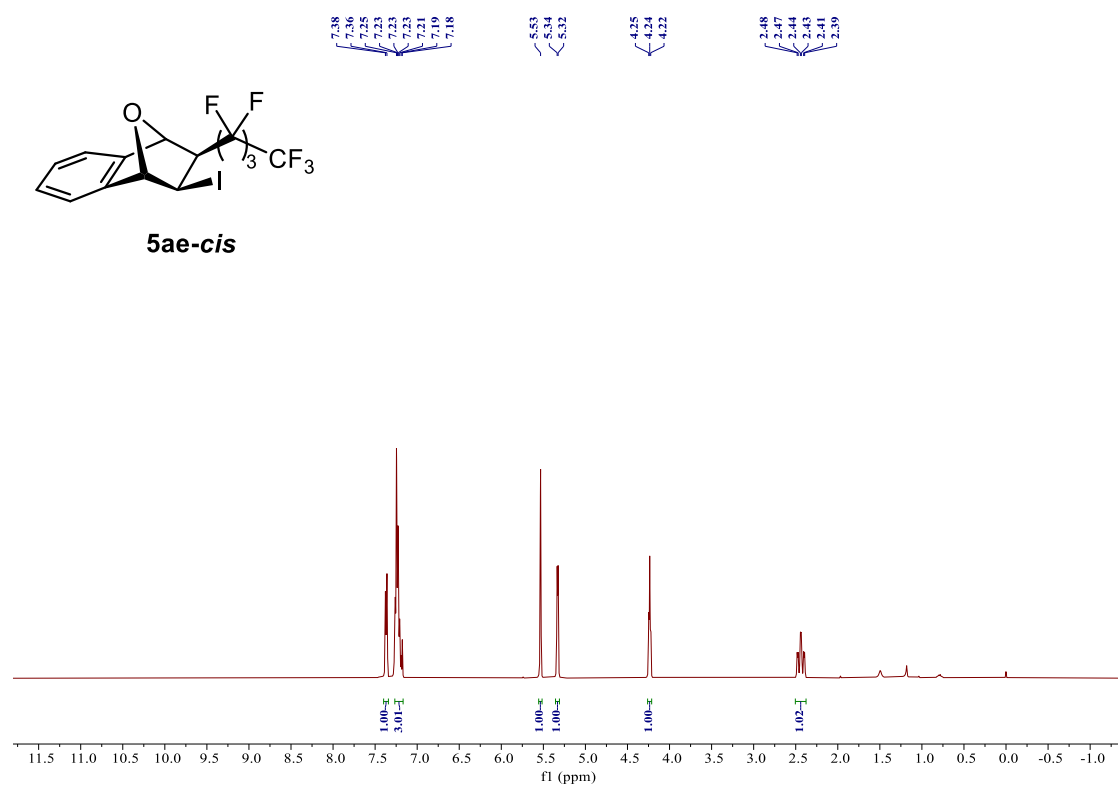



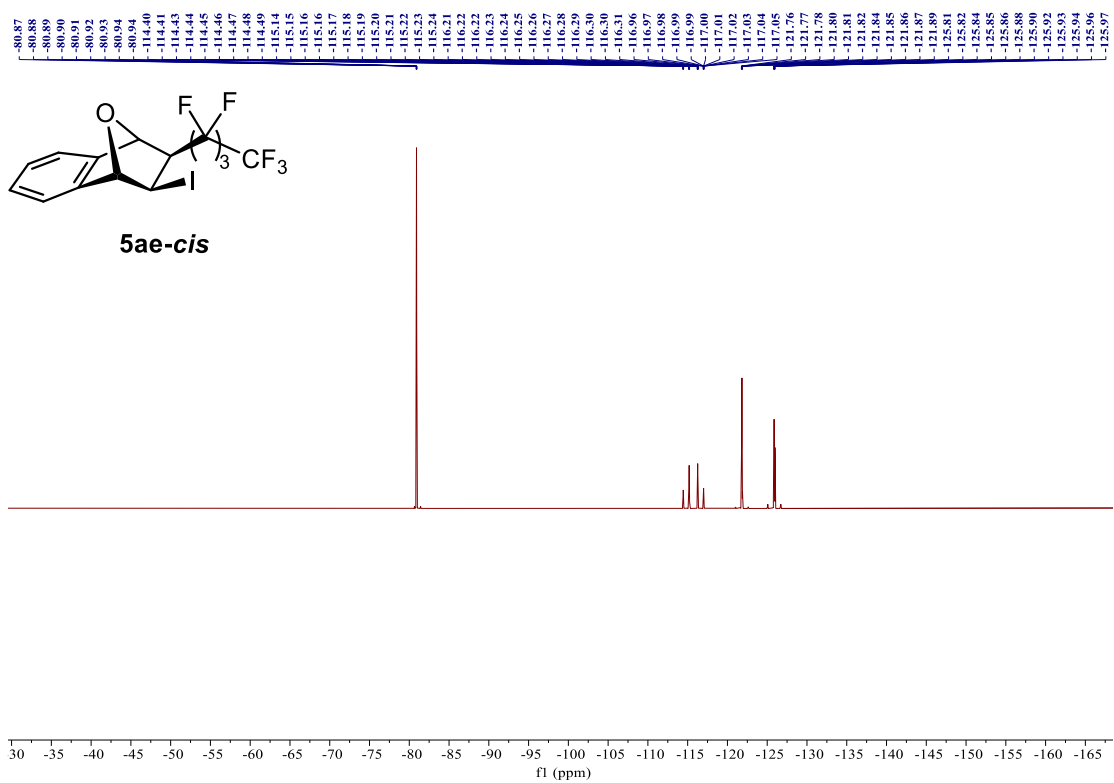

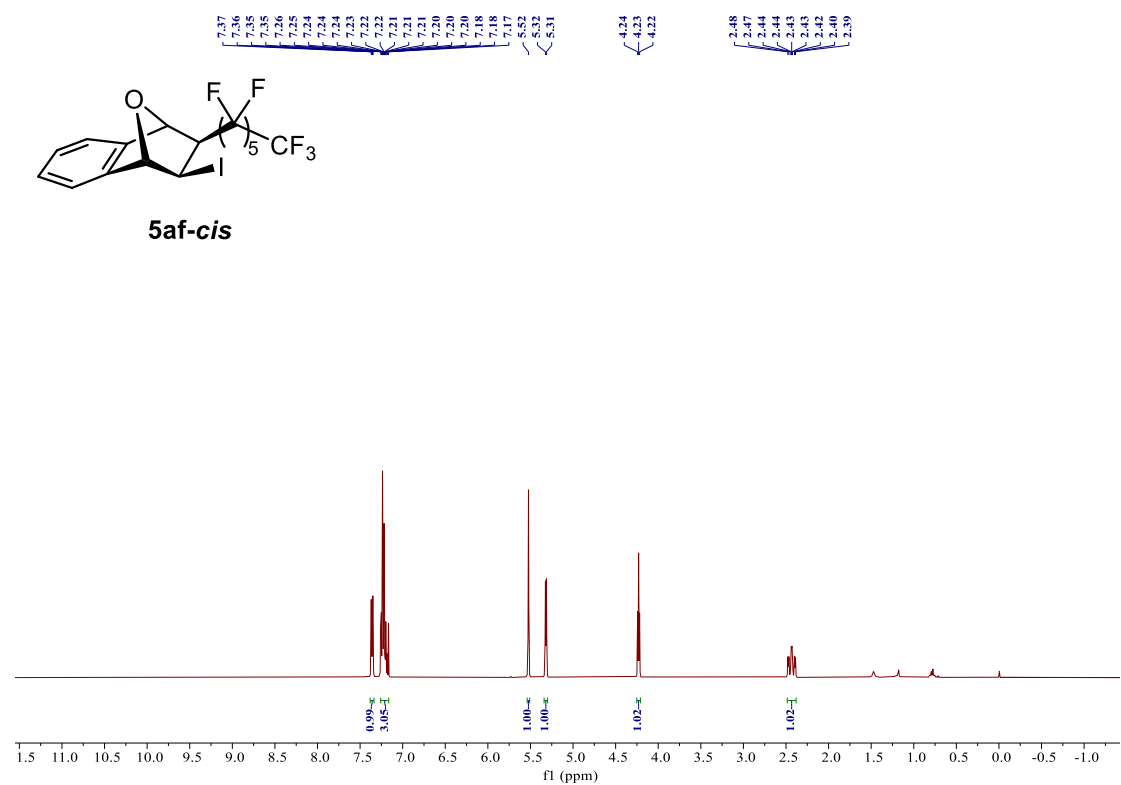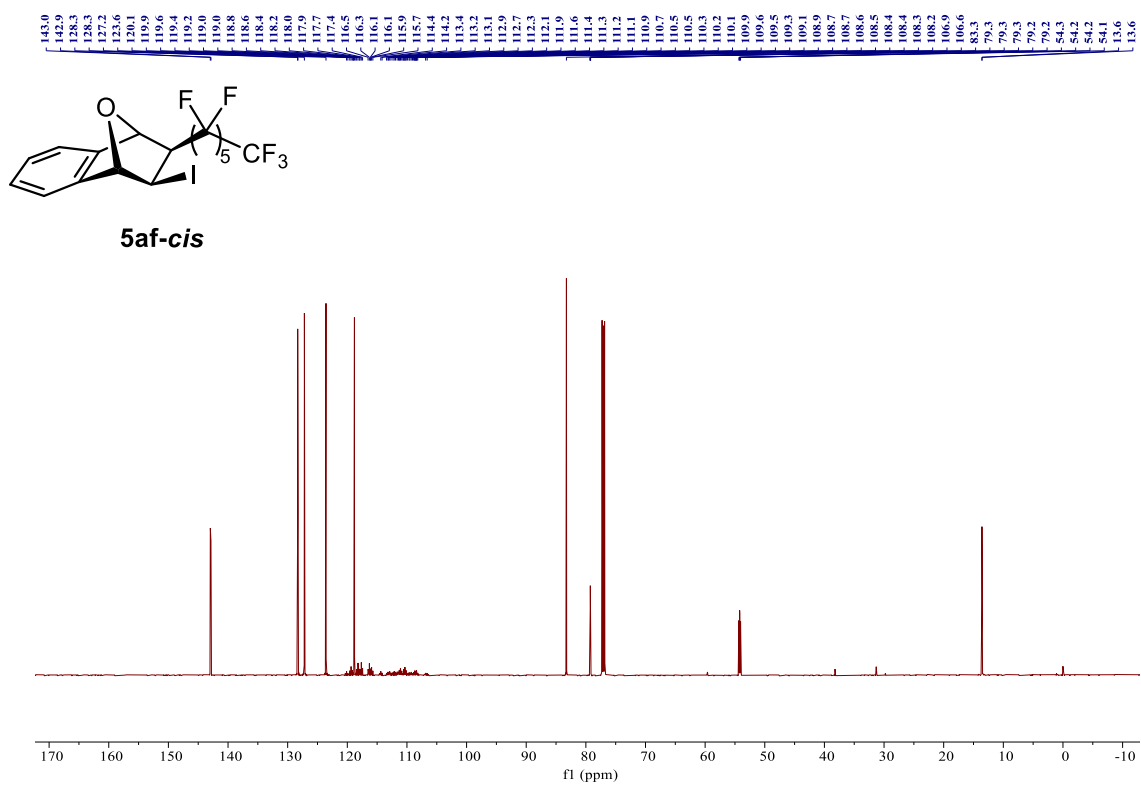

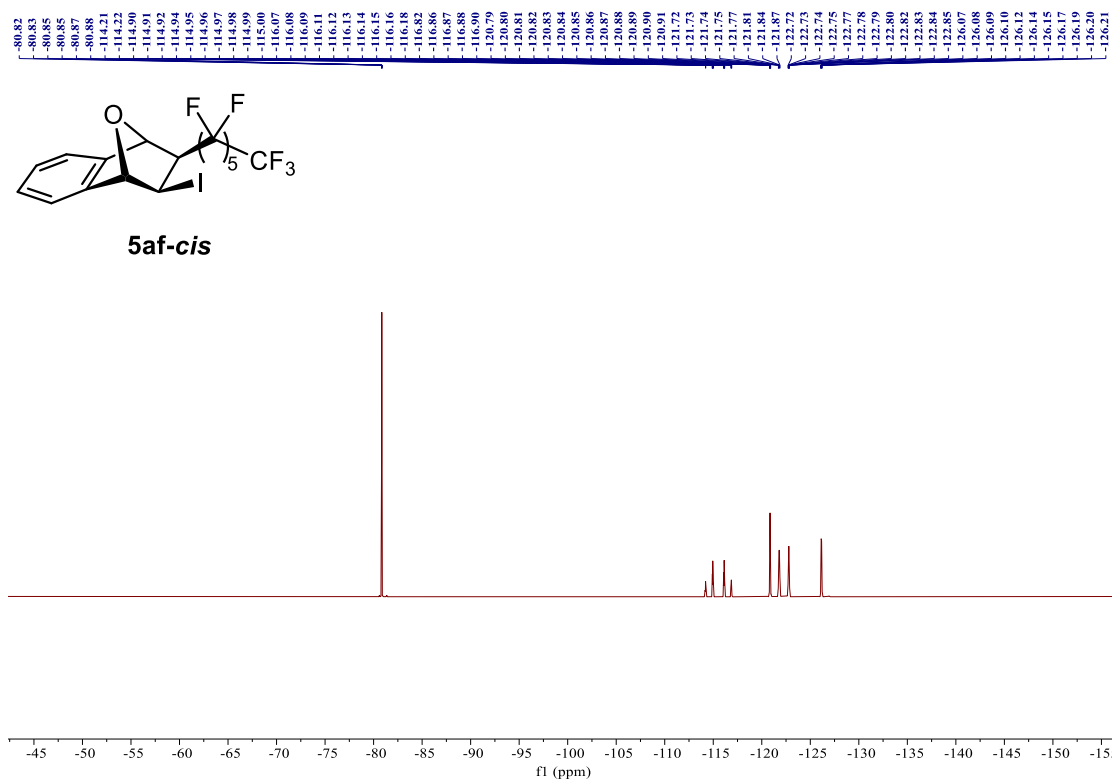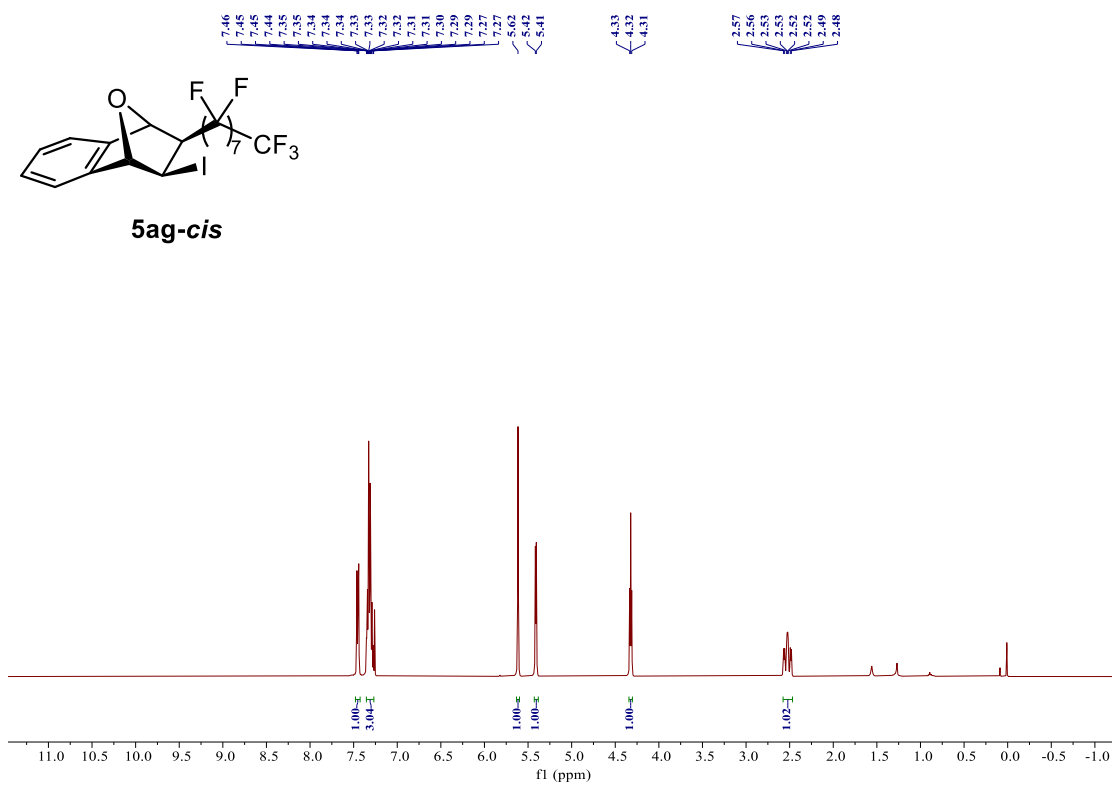

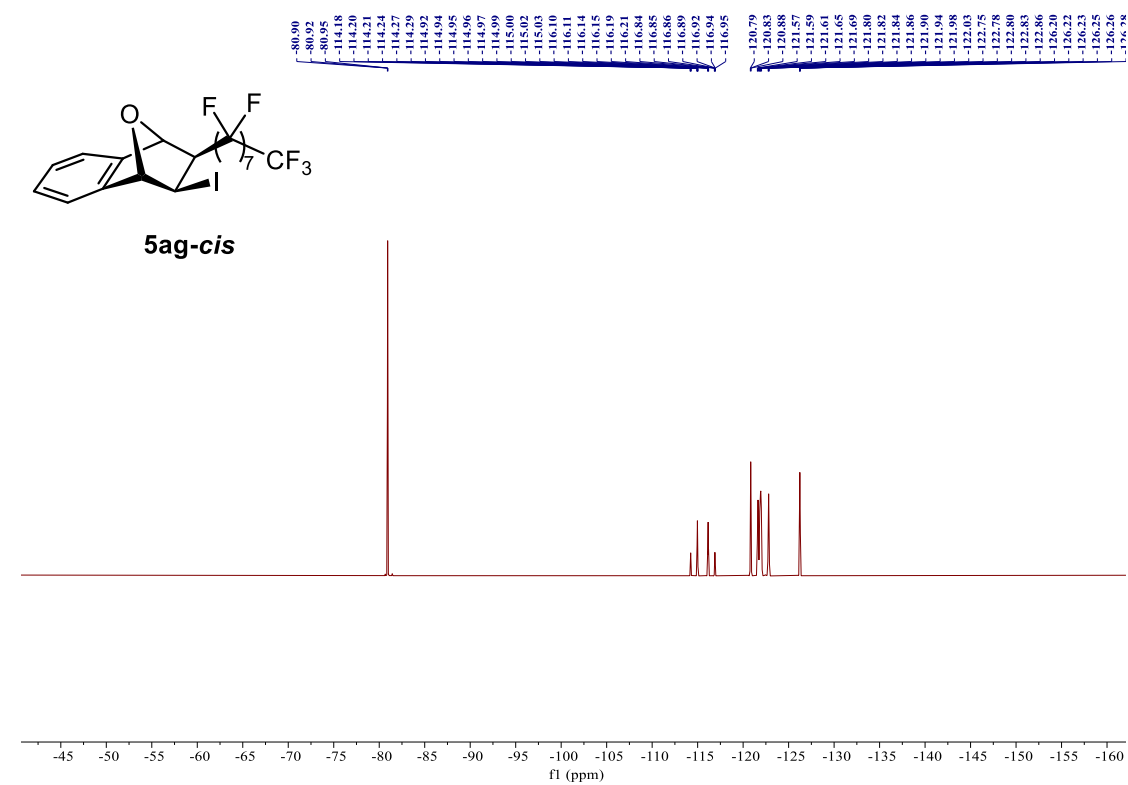

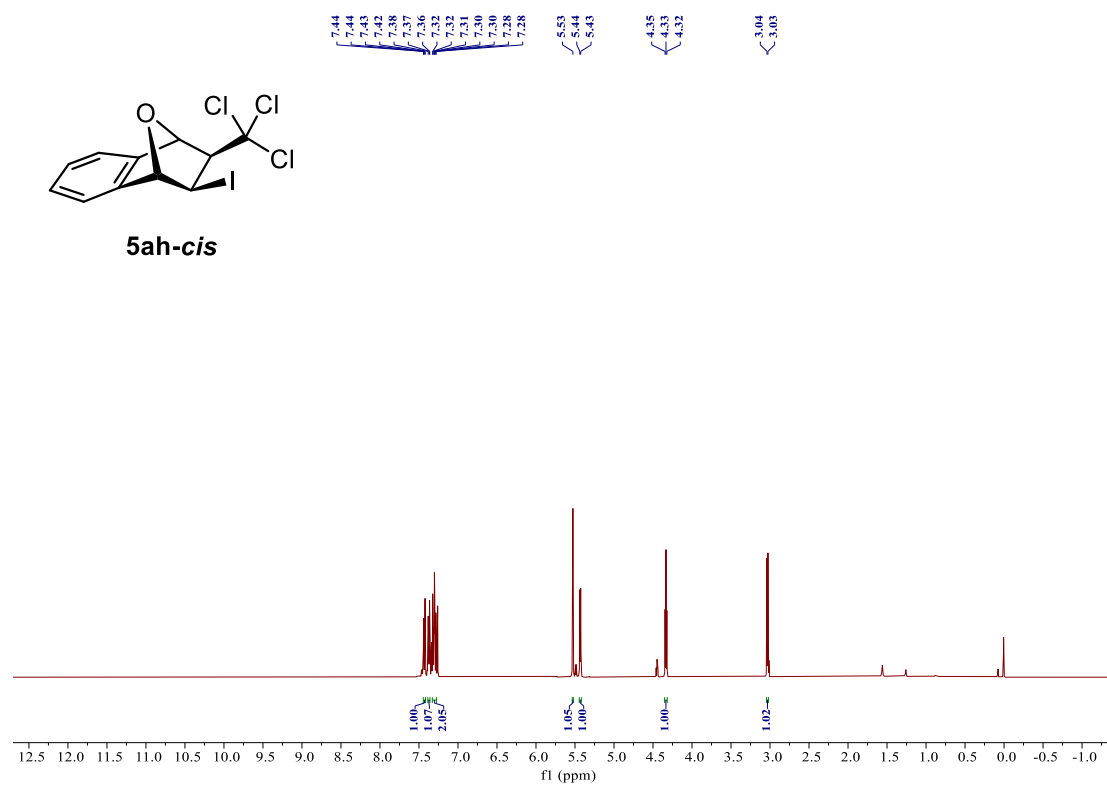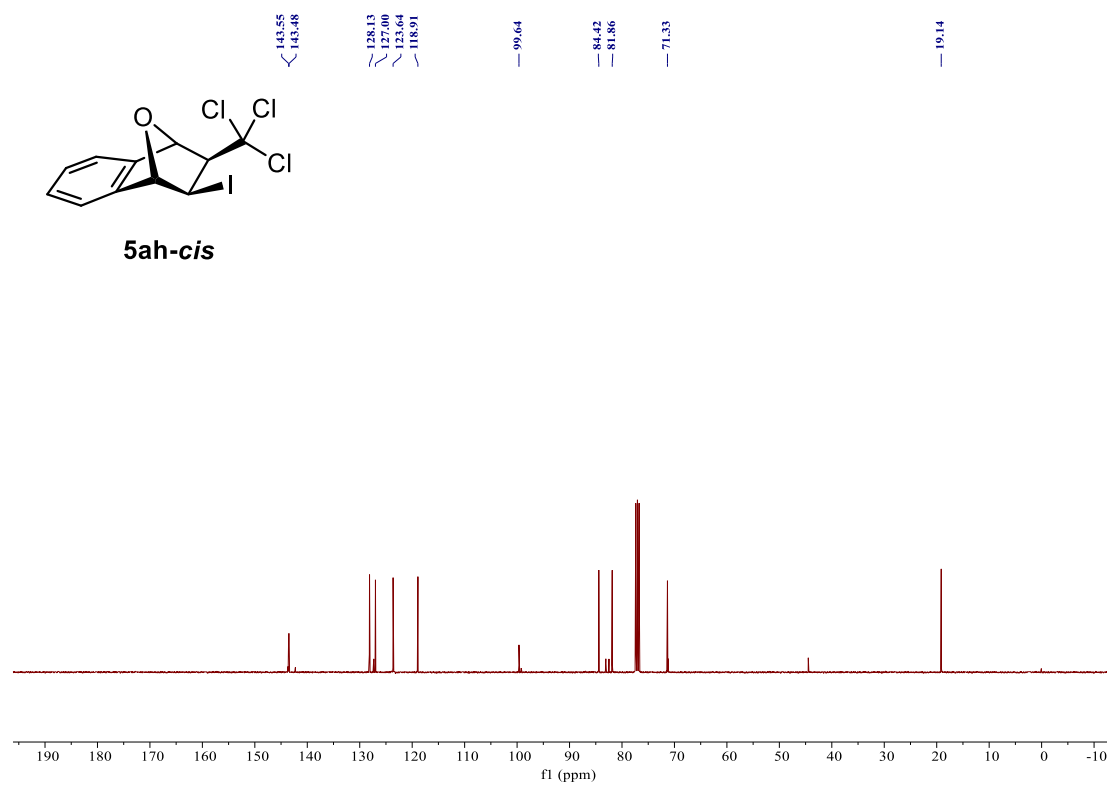

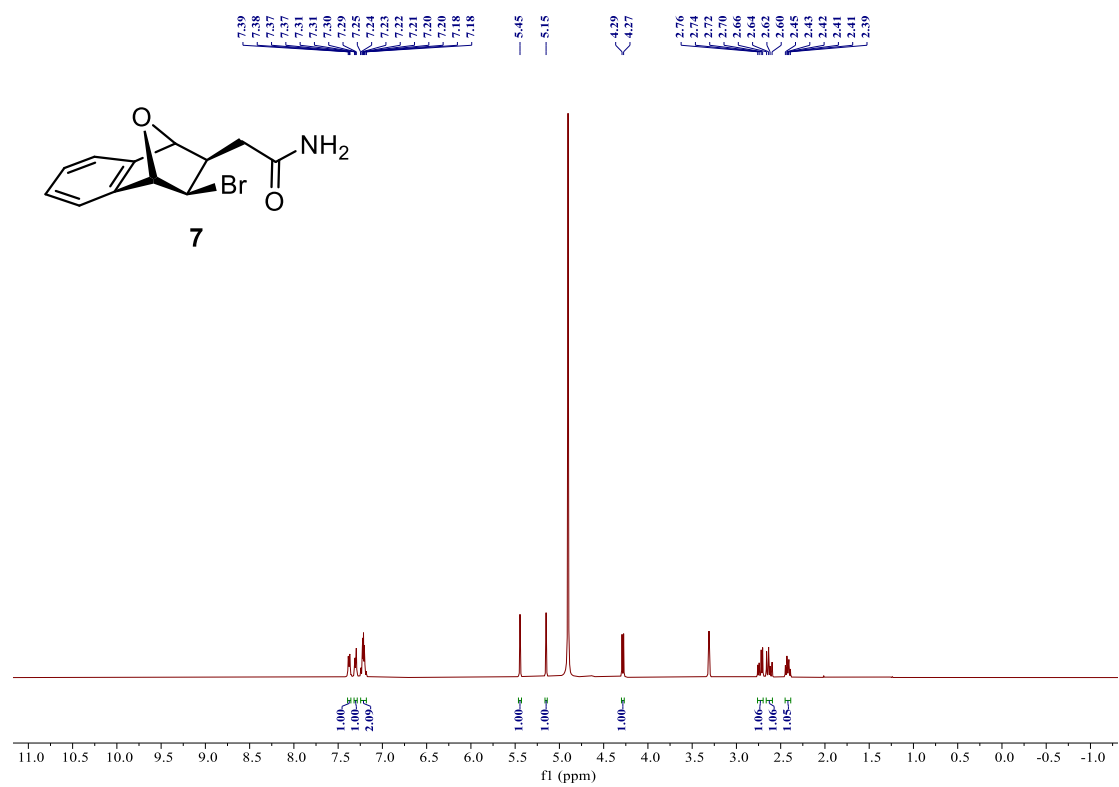

ff

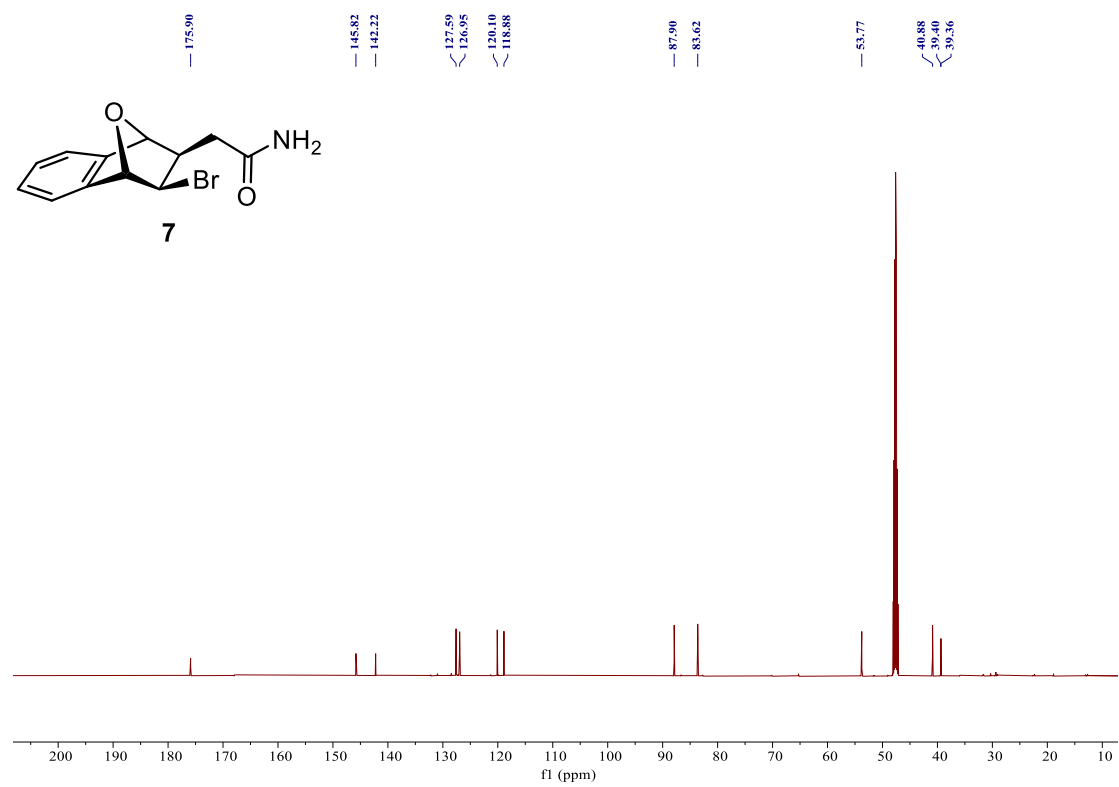

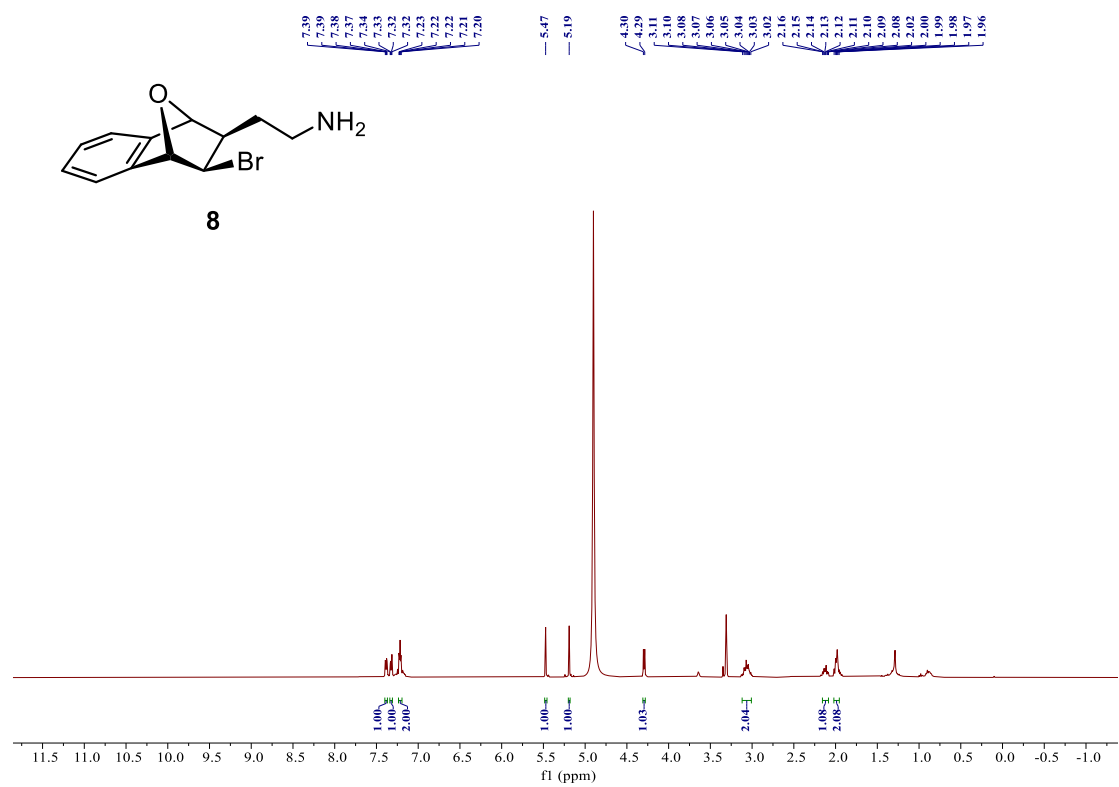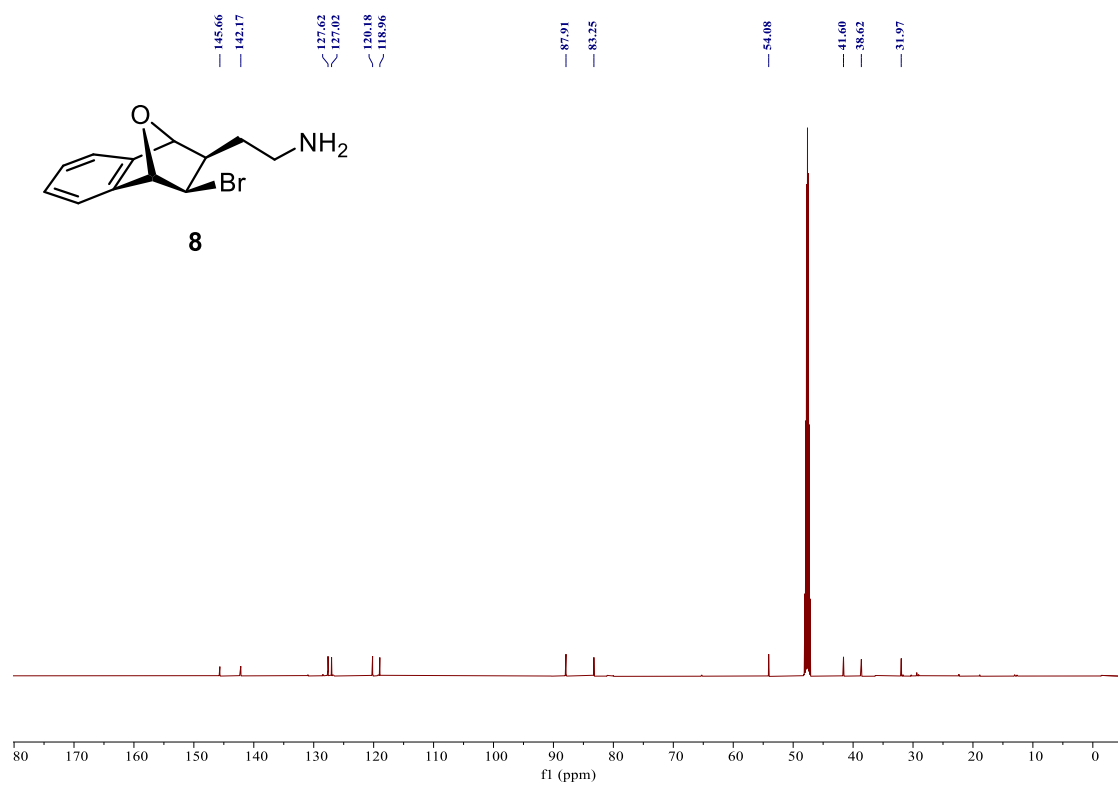

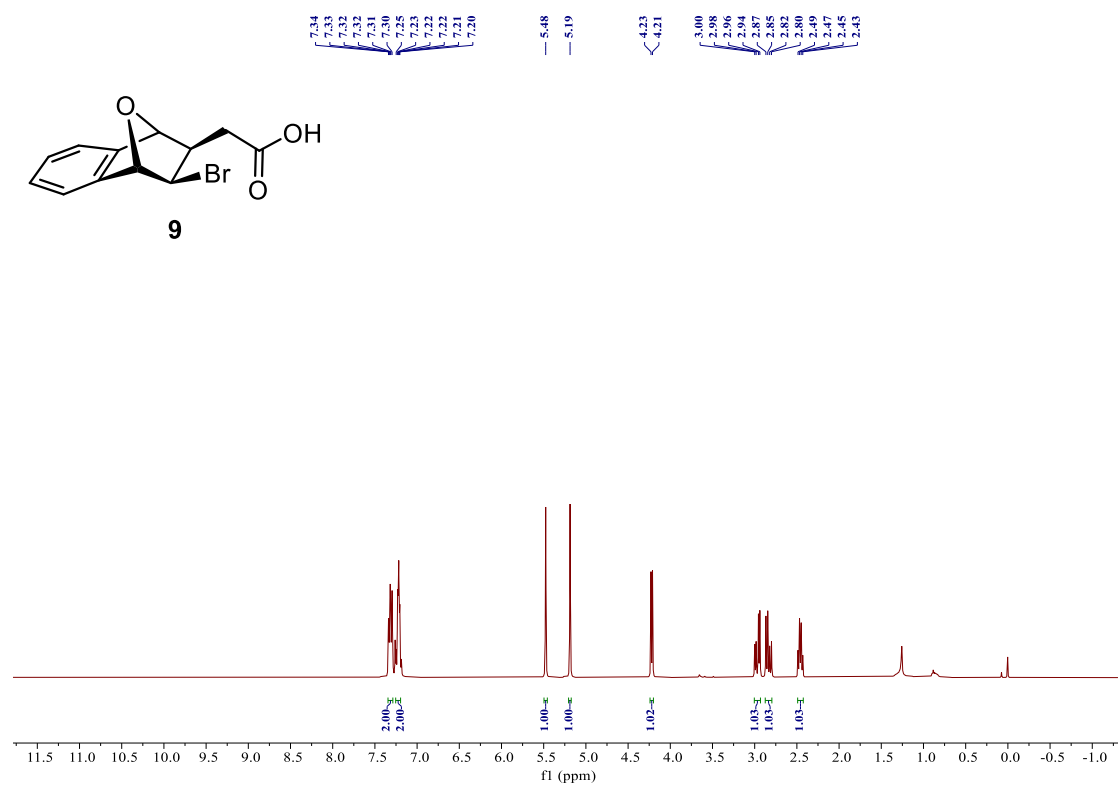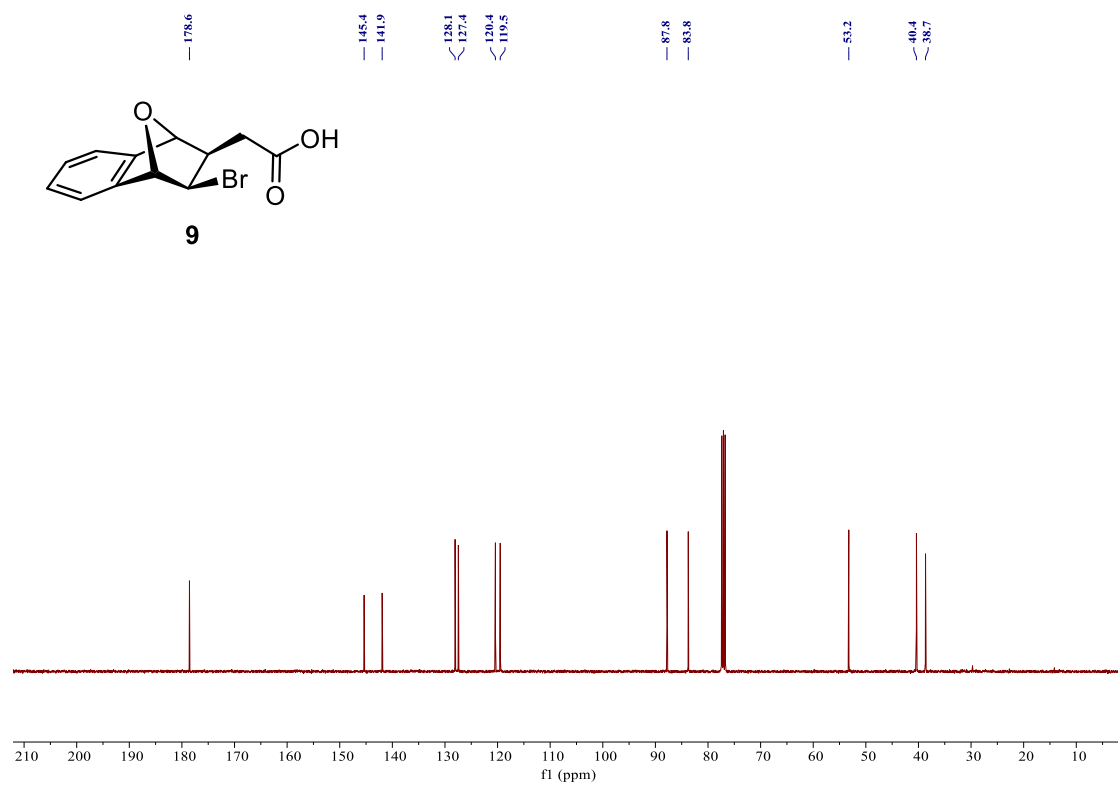



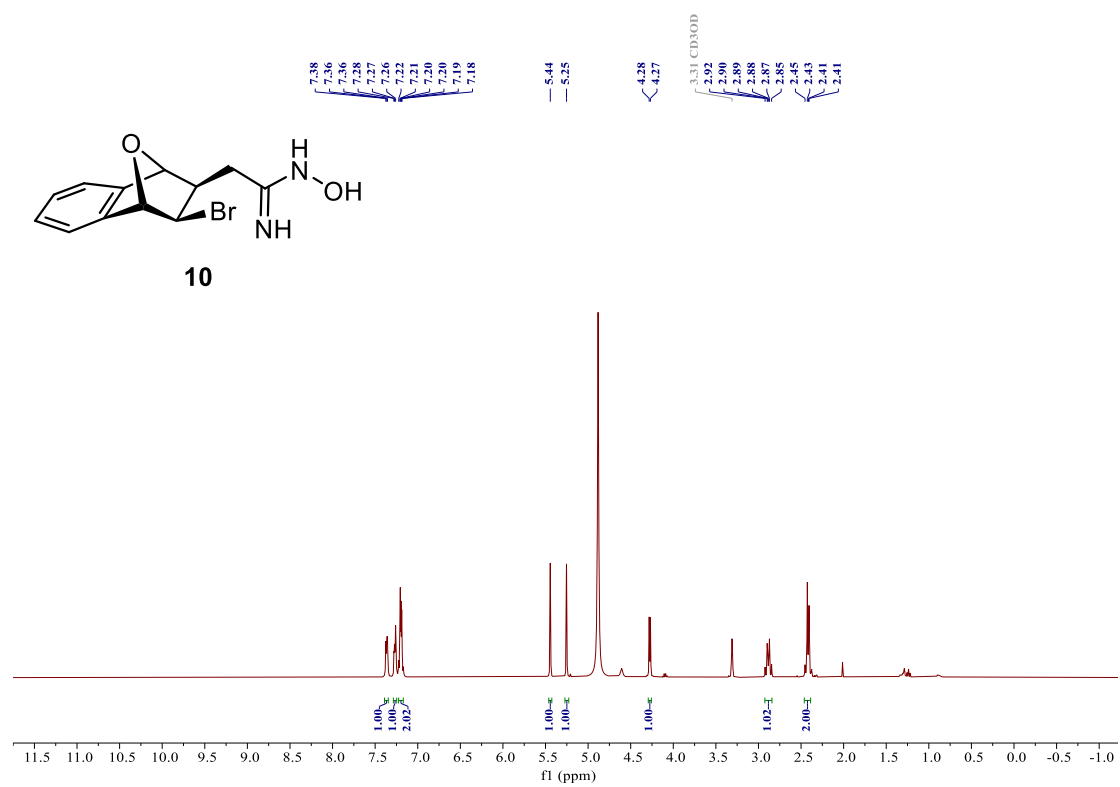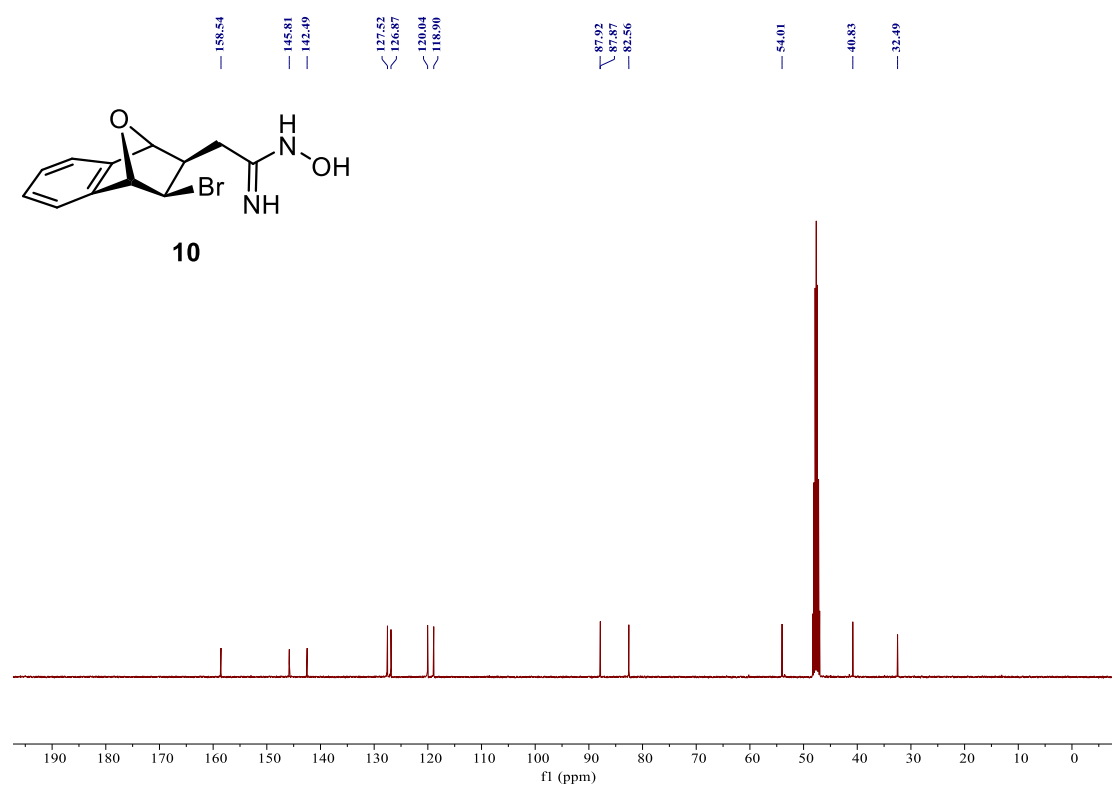

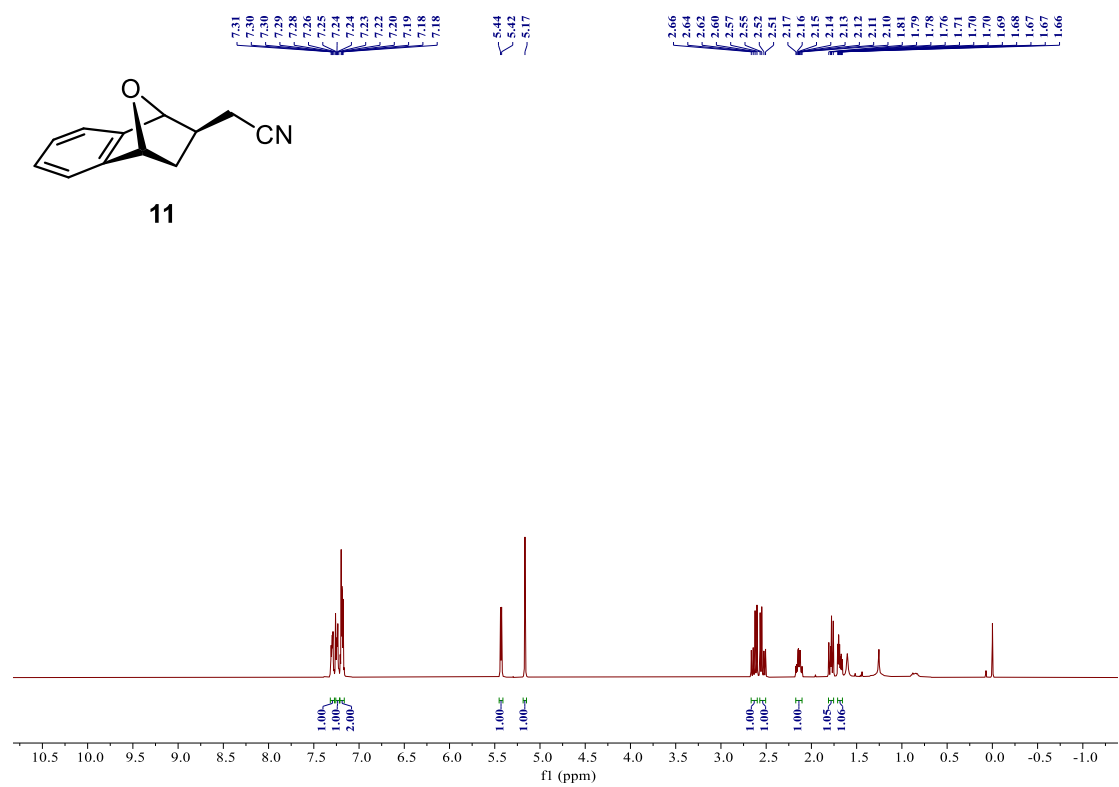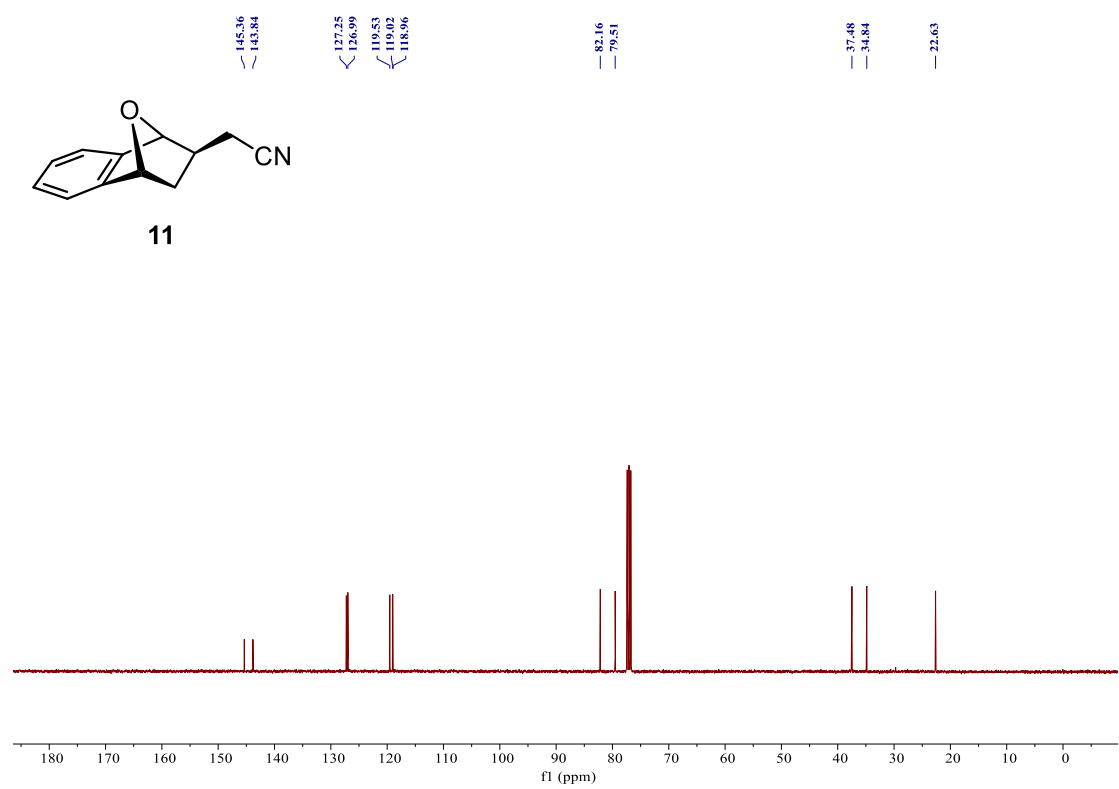

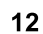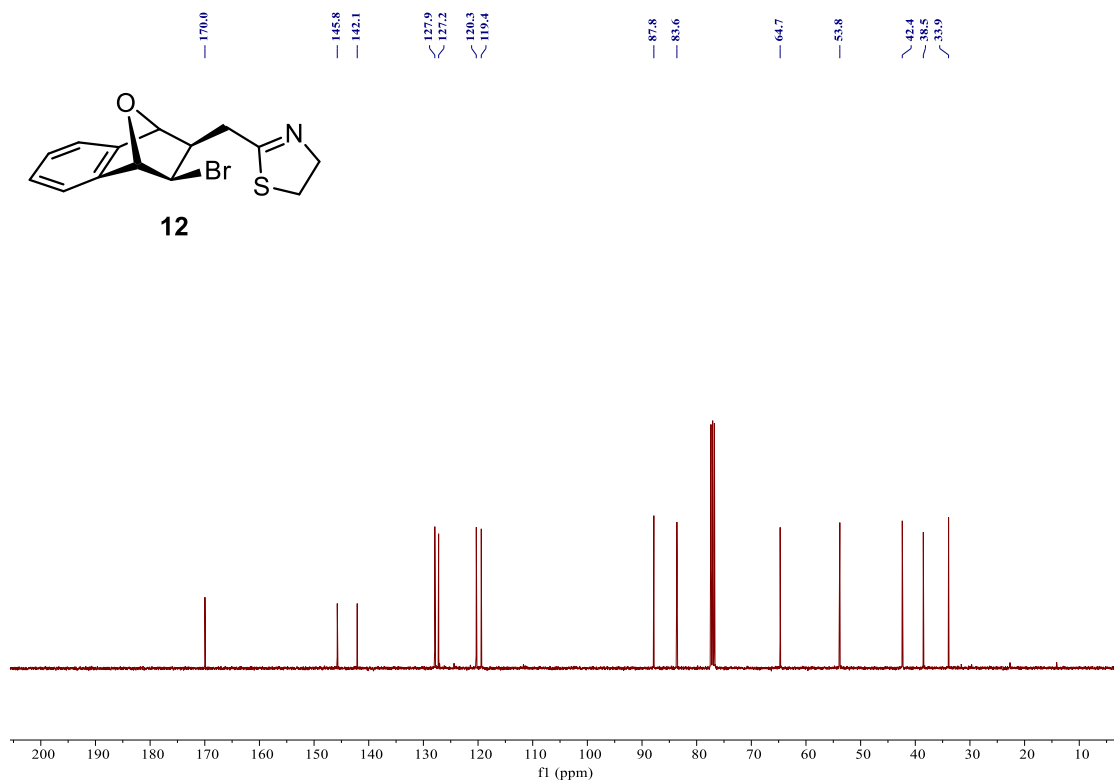

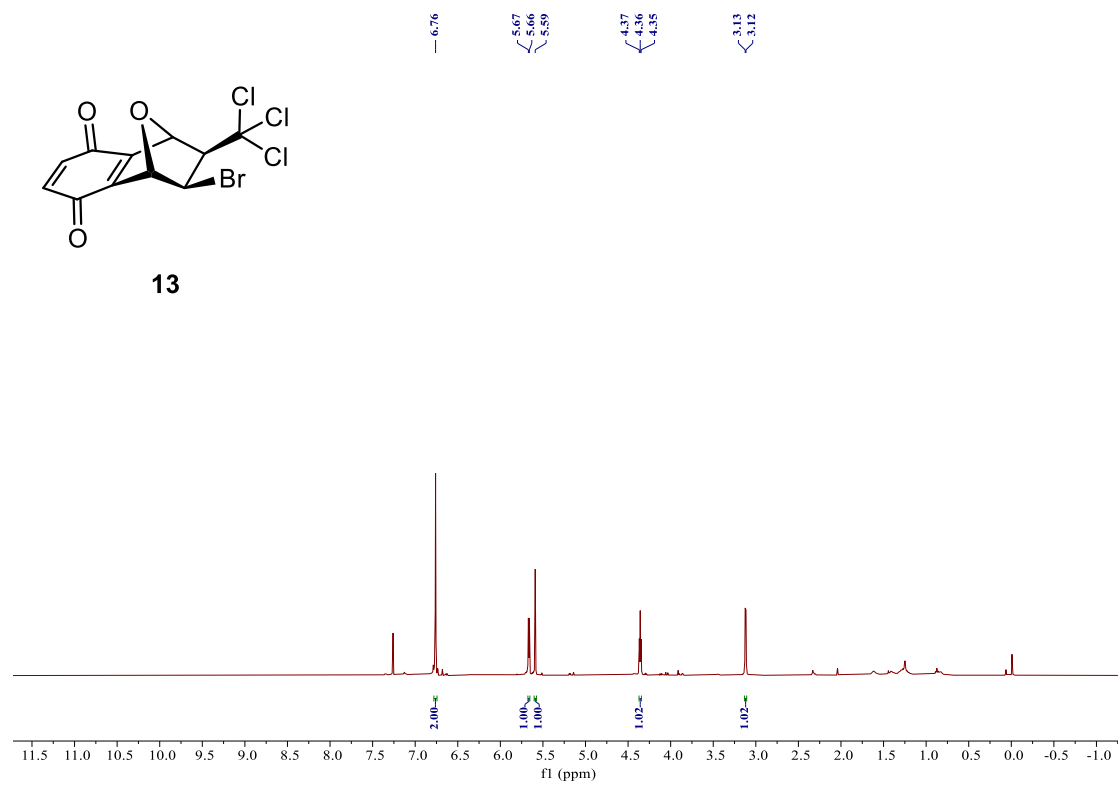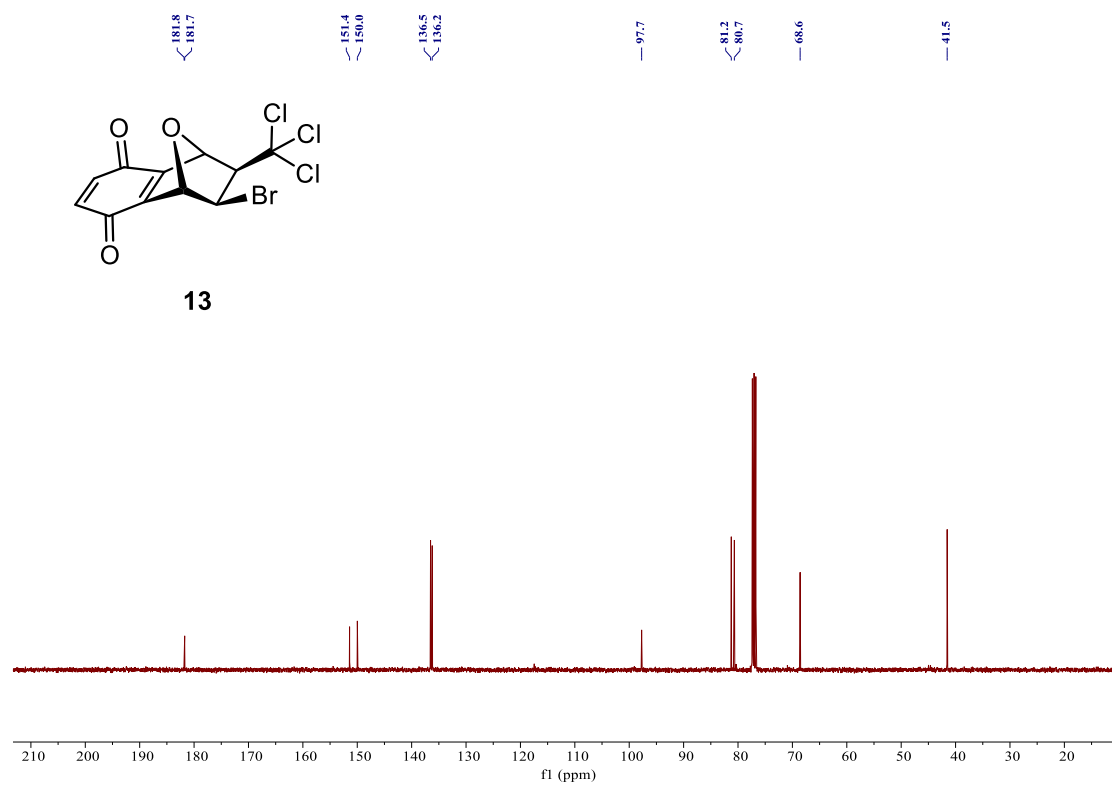

## 11. NMR evaluation of *cis-trans* diastereomer of crude mixture

The crude mixture of **3aa** with 0.05 mmol p-nitrotoluene as the internal standard.

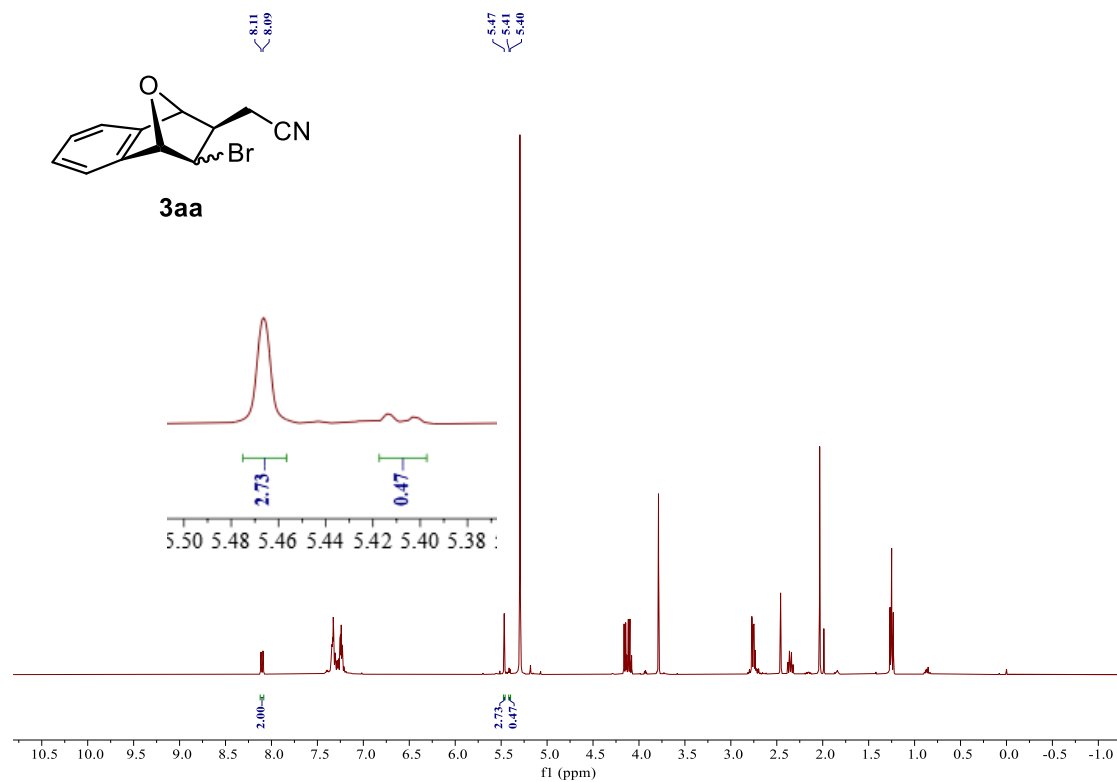

The crude mixture of **3ab** with 0.06 mmol p-nitrotoluene as the internal standard.

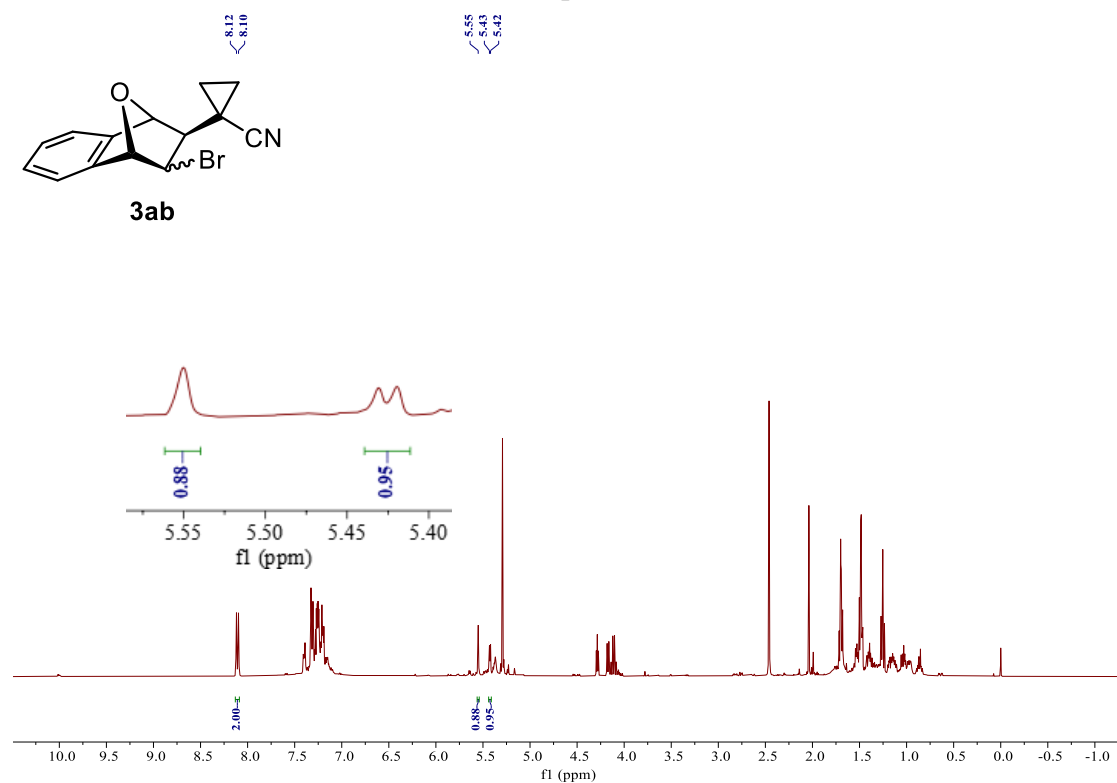

The crude mixture of **3ac** with 0.06 mmol p-nitrotoluene as the internal standard.

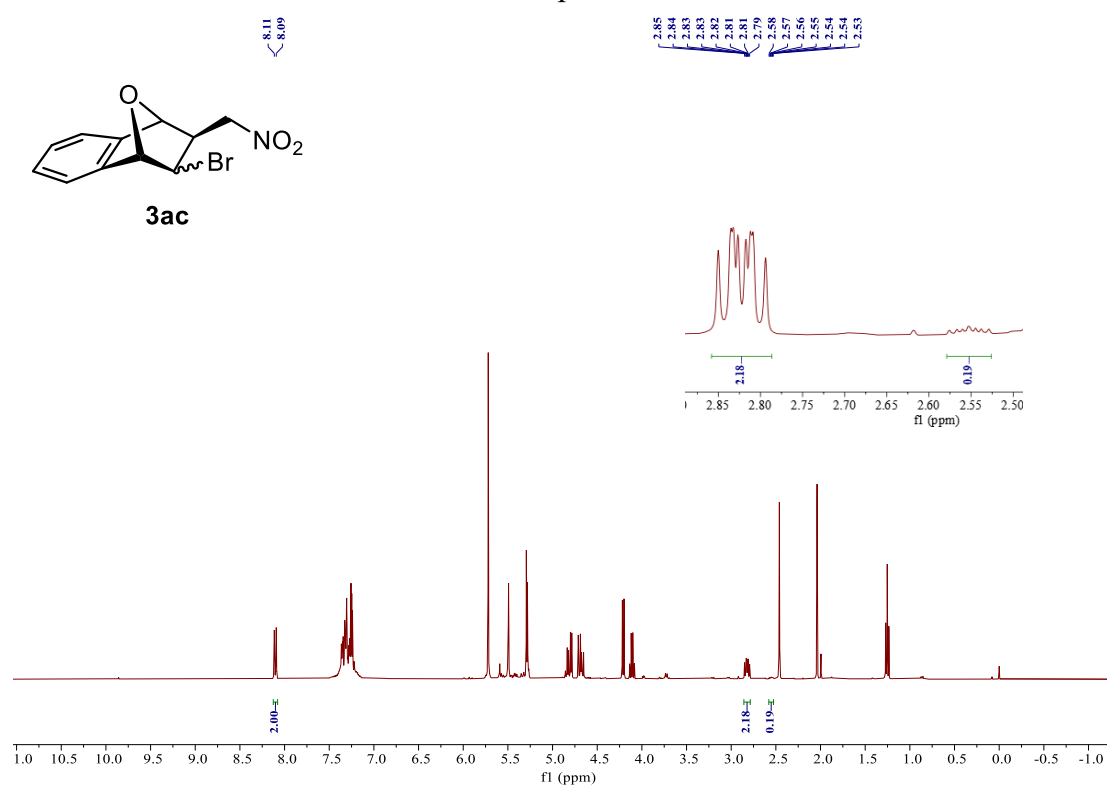

The crude mixture of **3ad** with 0.05 mmol p-nitrotoluene as the internal standard.

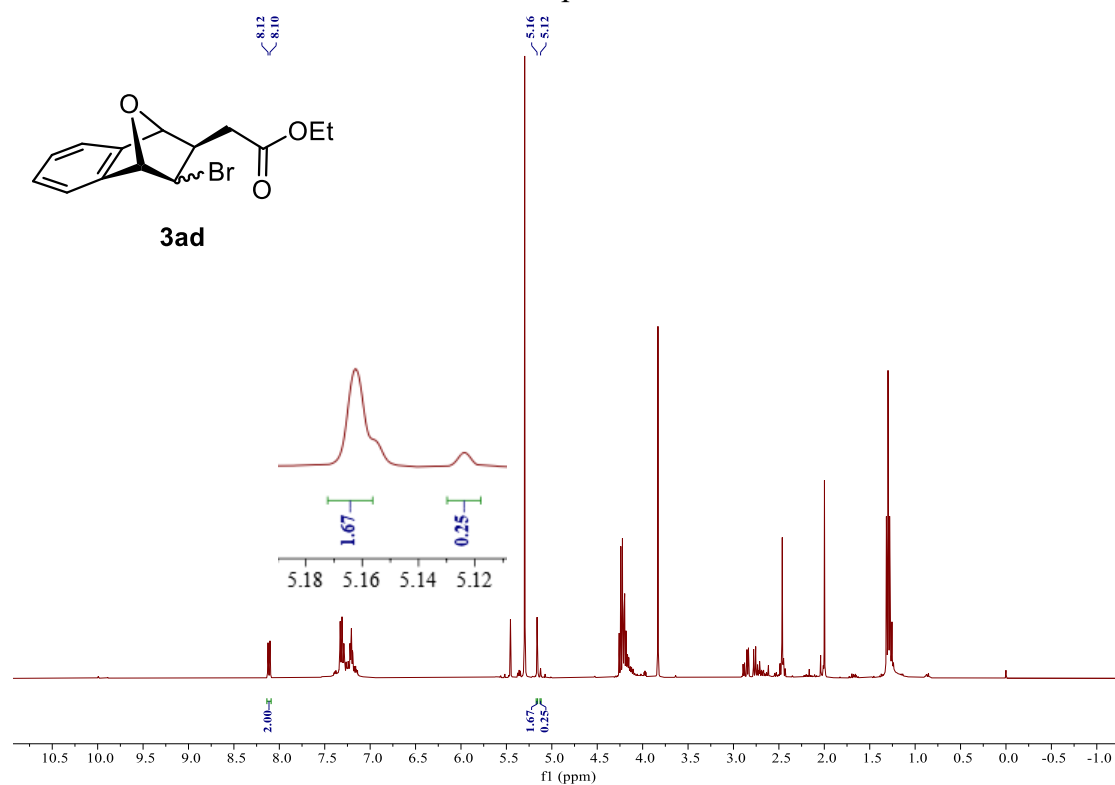

The crude mixture of **3ae** with 0.05 mmol p-nitrotoluene as the internal standard.

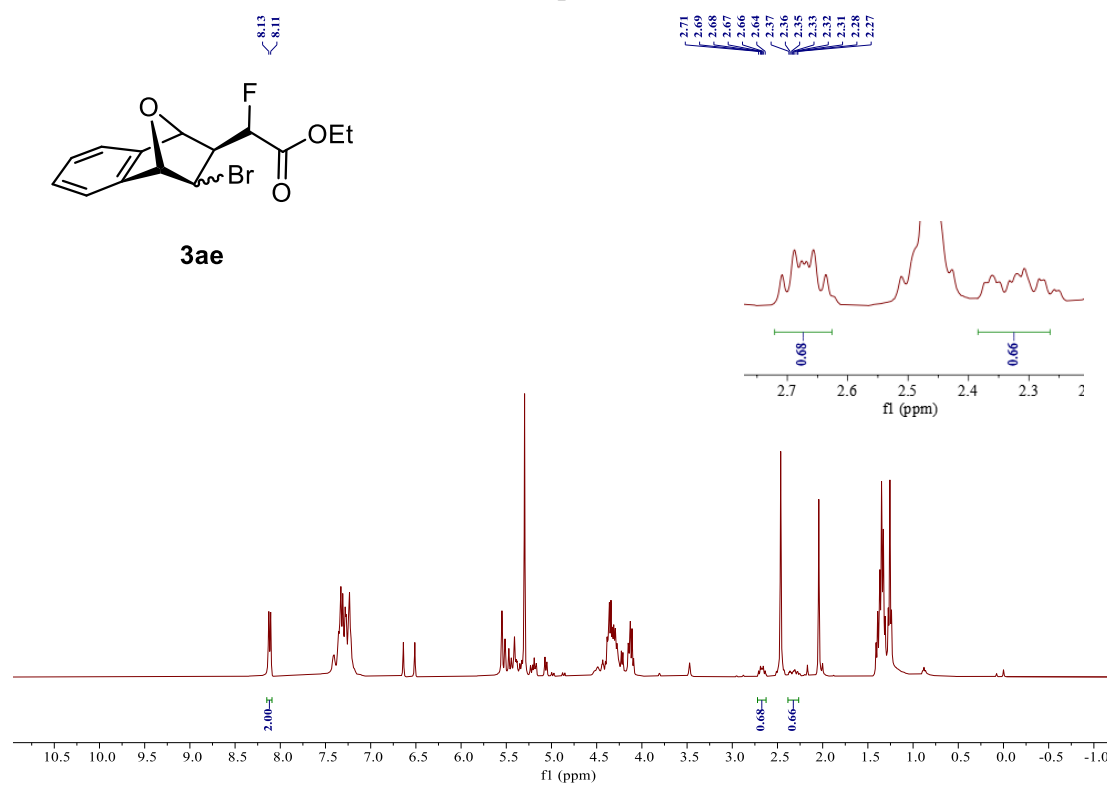

The crude mixture of **3af** with 0.06 mmol p-nitrotoluene as the internal standard.

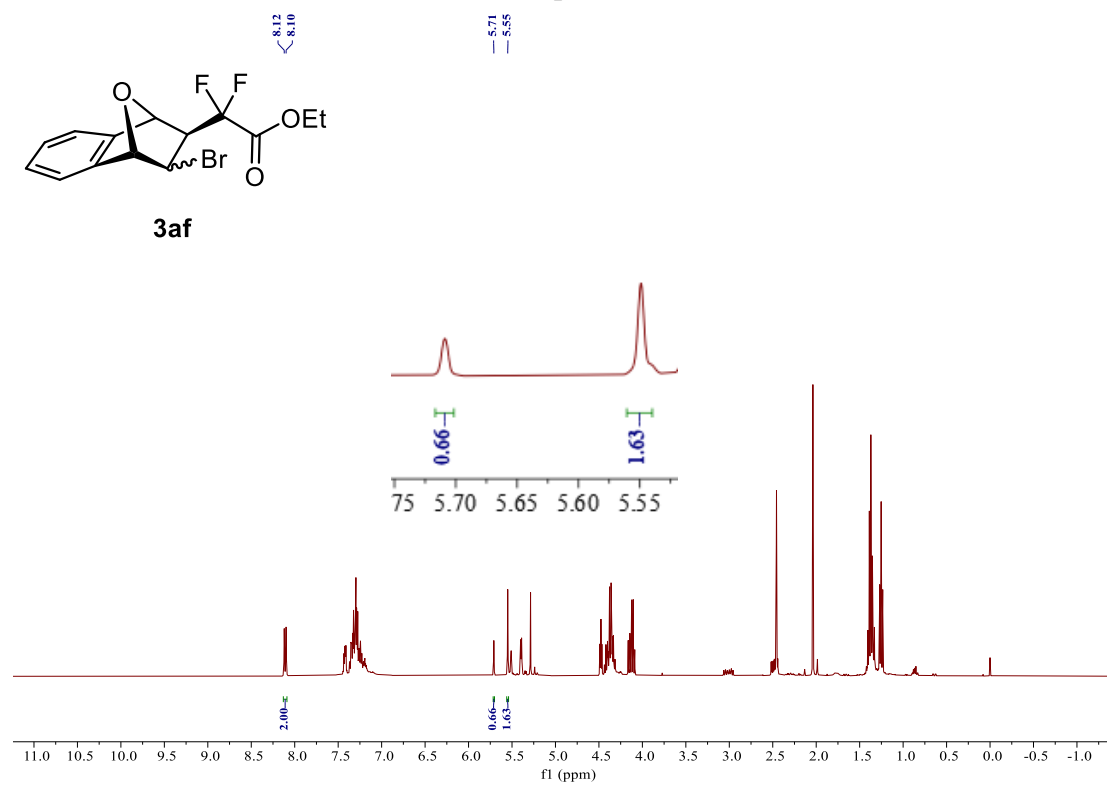

The crude mixture of **3ag** with 0.05 mmol p-nitrotoluene as the internal standard.

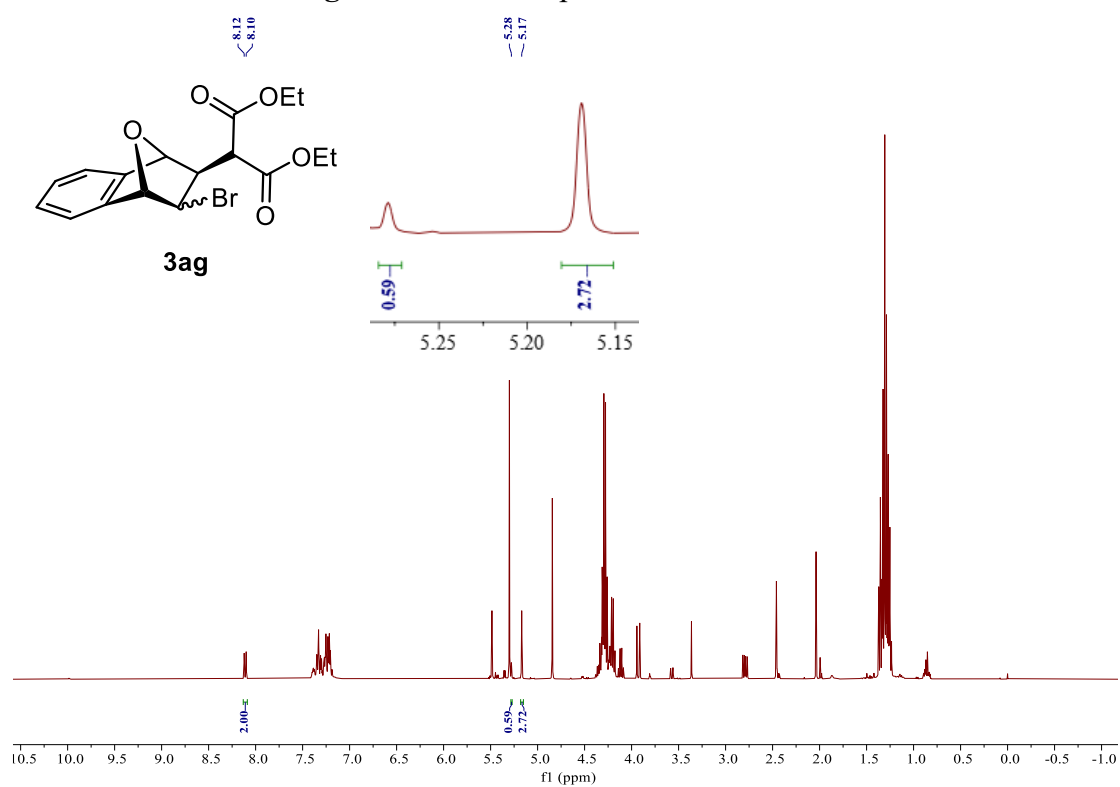

The crude mixture of **3ah** with 0.06 mmol p-nitrotoluene as the internal standard.

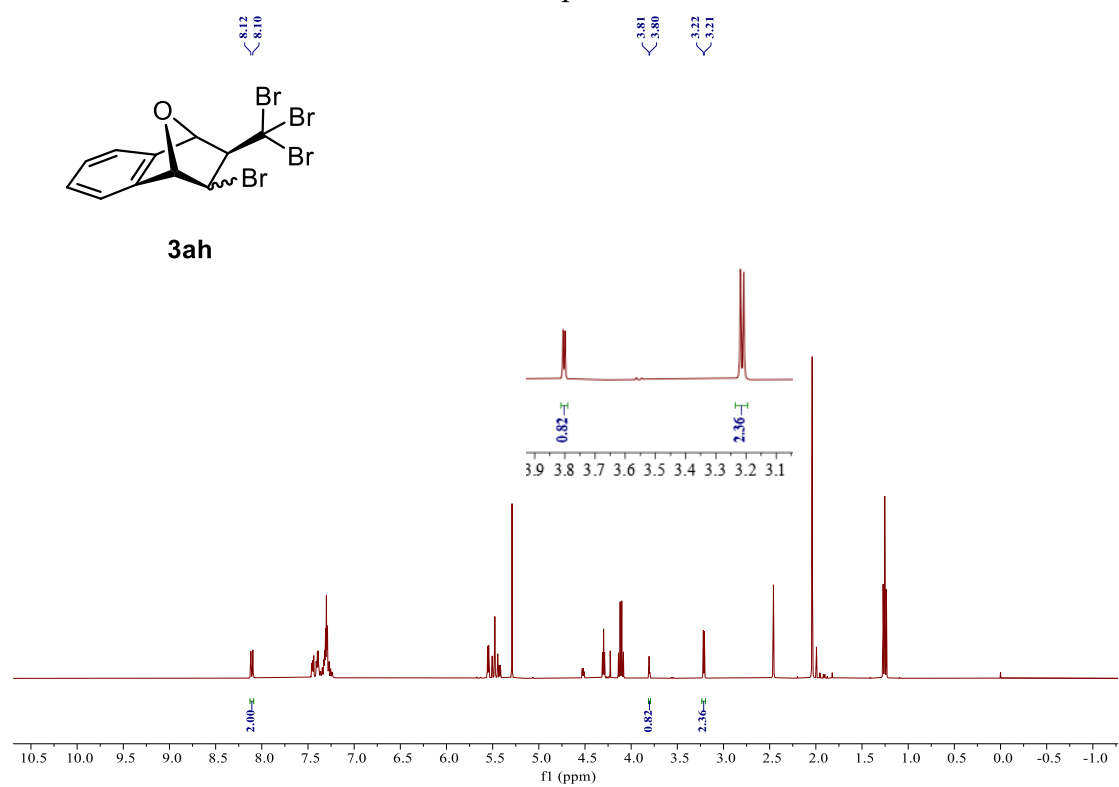



The crude mixture of **3ai** with 0.06 mmol p-nitrotoluene as the internal standard.

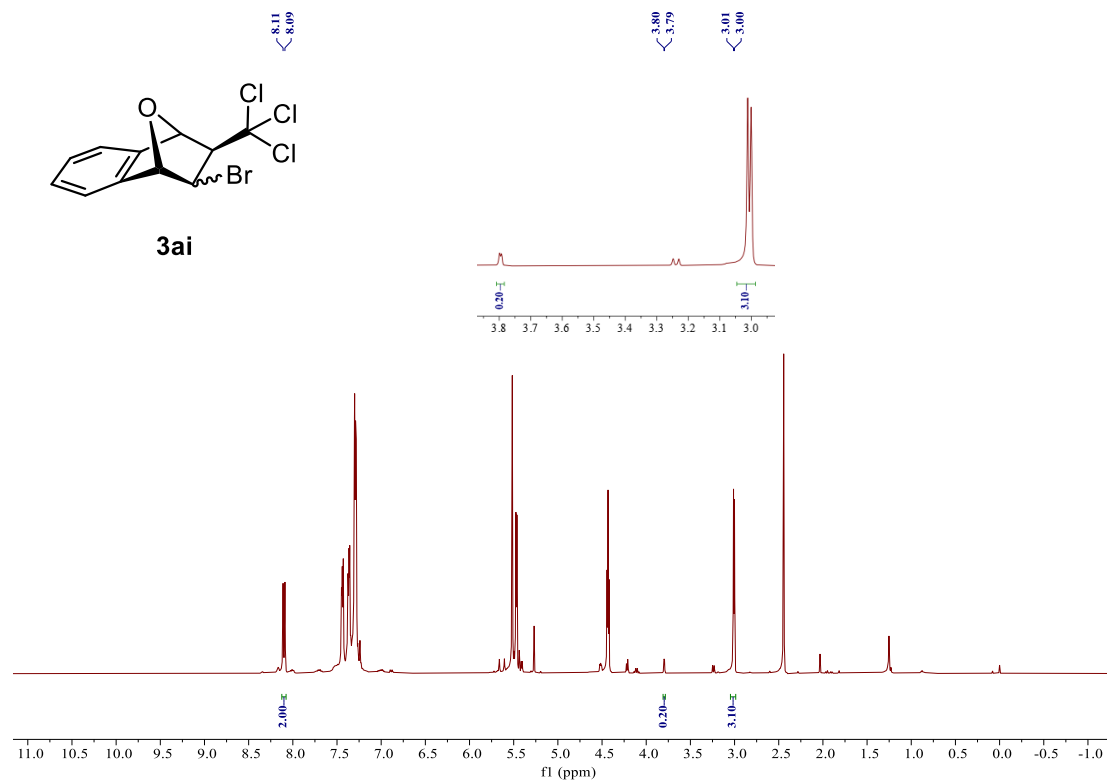

The crude mixture of **3bi** with 0.09 mmol 1,3-Benzodioxole as the internal standard.

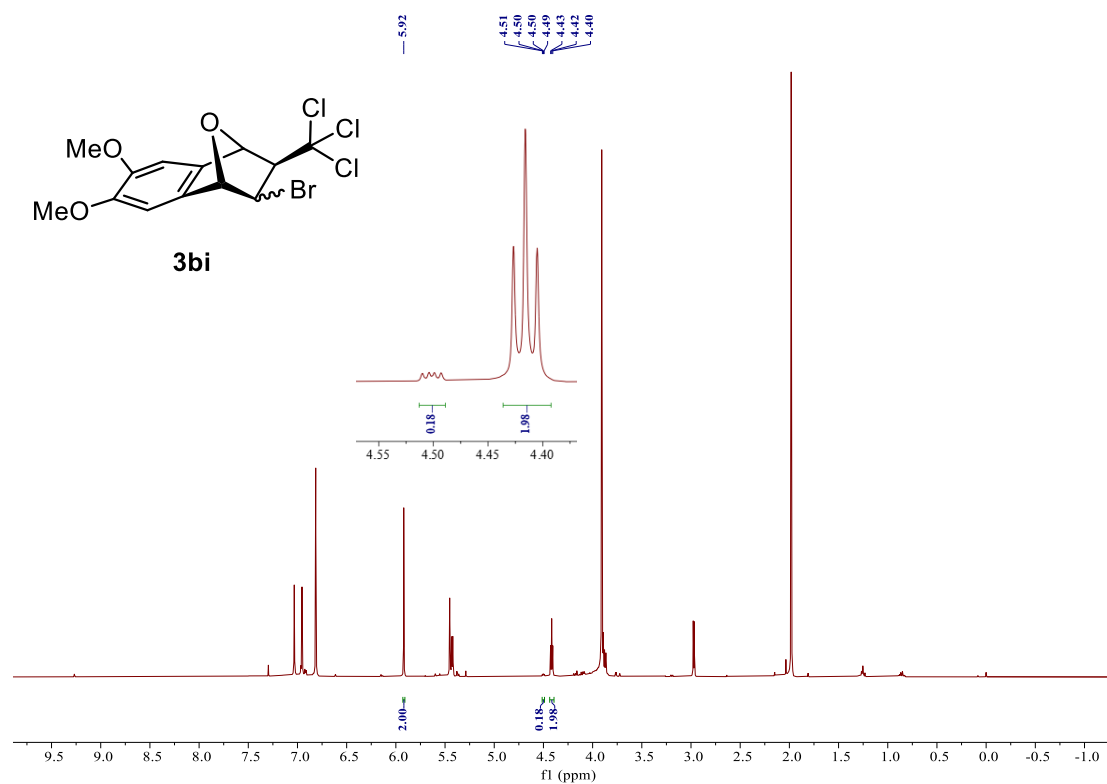

The crude mixture of **3ci** with 0.09 mmol 1,3-Benzodioxole as the internal standard.

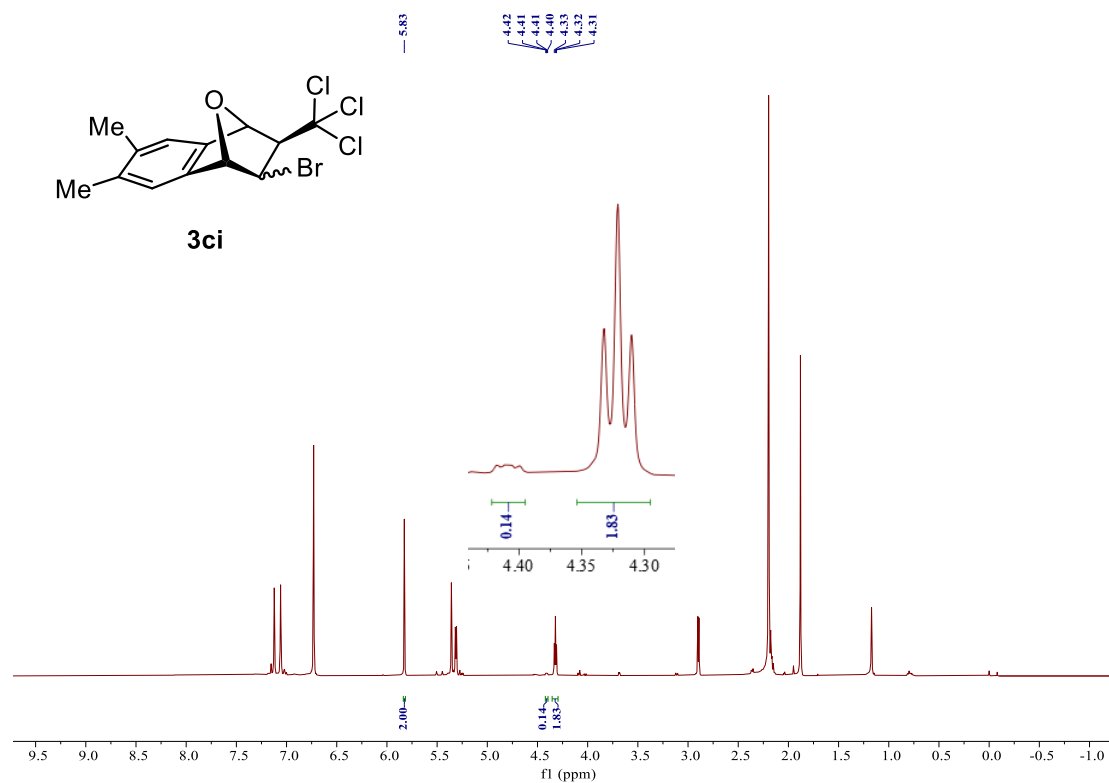

The crude mixture of **3di** with 0.10 mmol 1,3-Benzodioxole as the internal standard.

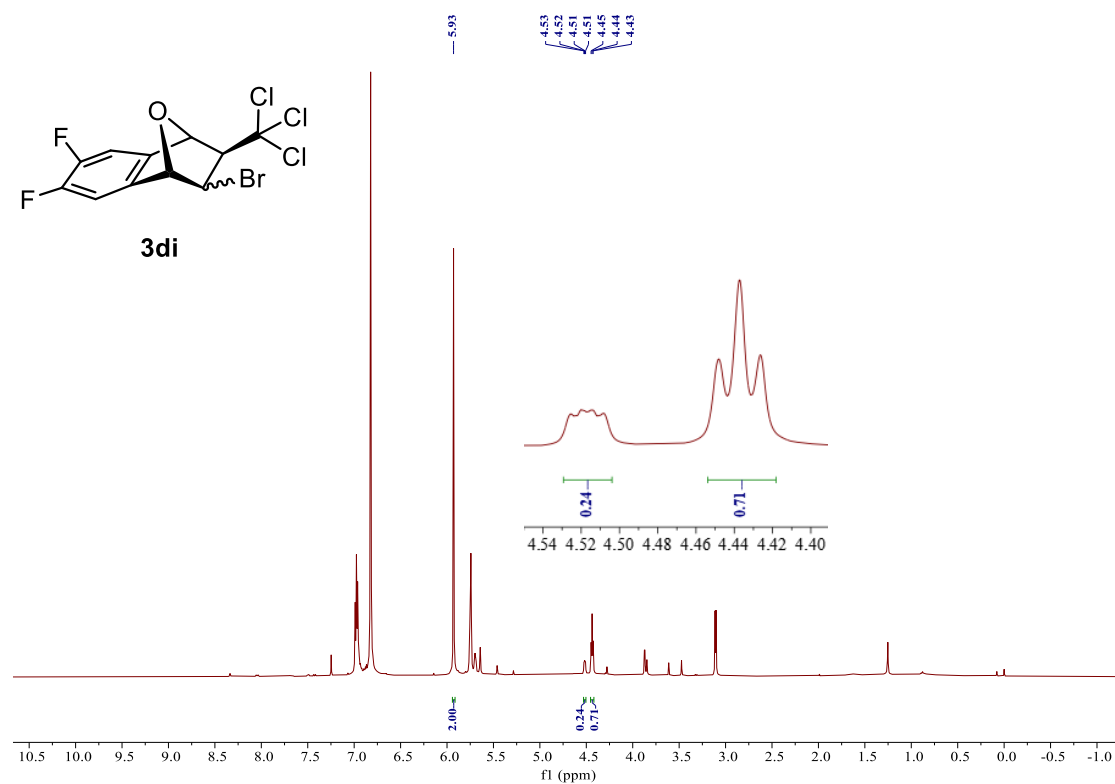

**3ei**

Chemical structure of **3ei** is shown above the spectrum.

<sup>1</sup>H NMR spectrum (CDCl<sub>3</sub>) of **3ei** is displayed below the structure. The x-axis represents the chemical shift in ppm, ranging from 10.0 to -1.0.

Key peaks and integrations are labeled:

- Peak at 2.00 ppm (integration 2.00).
- Peak at 4.93 ppm (integration 0.27).
- Peak at 4.40 ppm (integration 1.99).

Chemical shifts (ppm) for the peaks in the 4.40-4.50 ppm region are listed as: 4.50, 4.49, 4.49, 4.48, 4.43, 4.41, 4.40.

Chemical structure of **3fi** is shown. The  $^1\text{H}$  NMR spectrum (CDCl<sub>3</sub>) displays a multiplet between 4.36 and 4.52 ppm, with integration values of 0.30 and 1.97. A sharp singlet is observed at 4.00 ppm, and another sharp singlet is at 2.00 ppm. The x-axis is labeled f1 (ppm).

The crude mixture of **3gi** with 0.10 mmol 1,3-Benzodioxole as the internal standard.

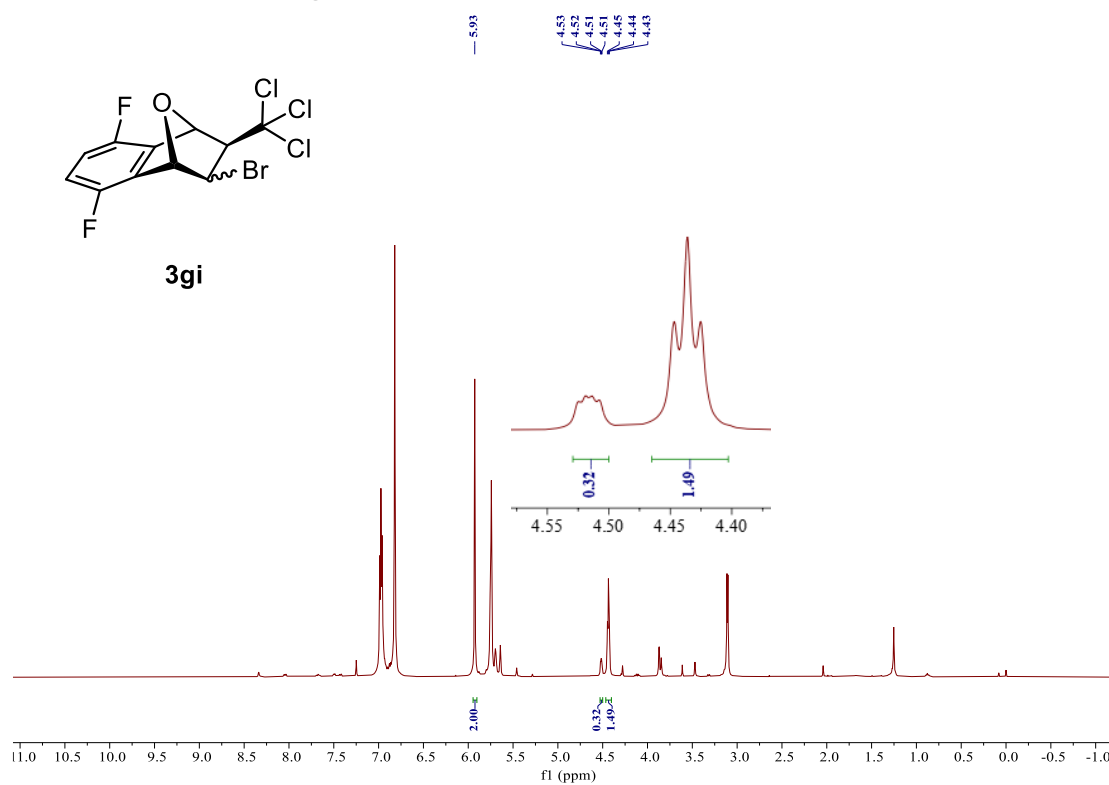

The crude mixture of **3hi** with 0.09 mmol 1,3-Benzodioxole as the internal standard.

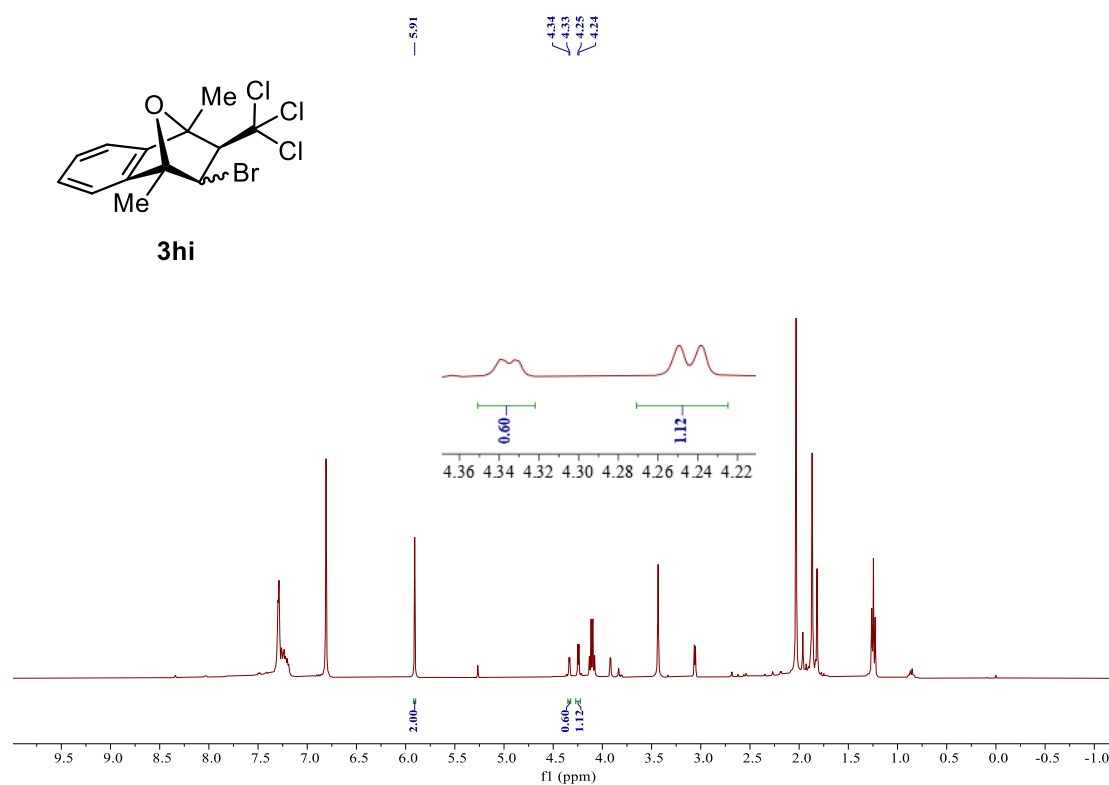

The crude mixture of **3ii** with 0.10 mmol 1,3-Benzodioxole as the internal standard.

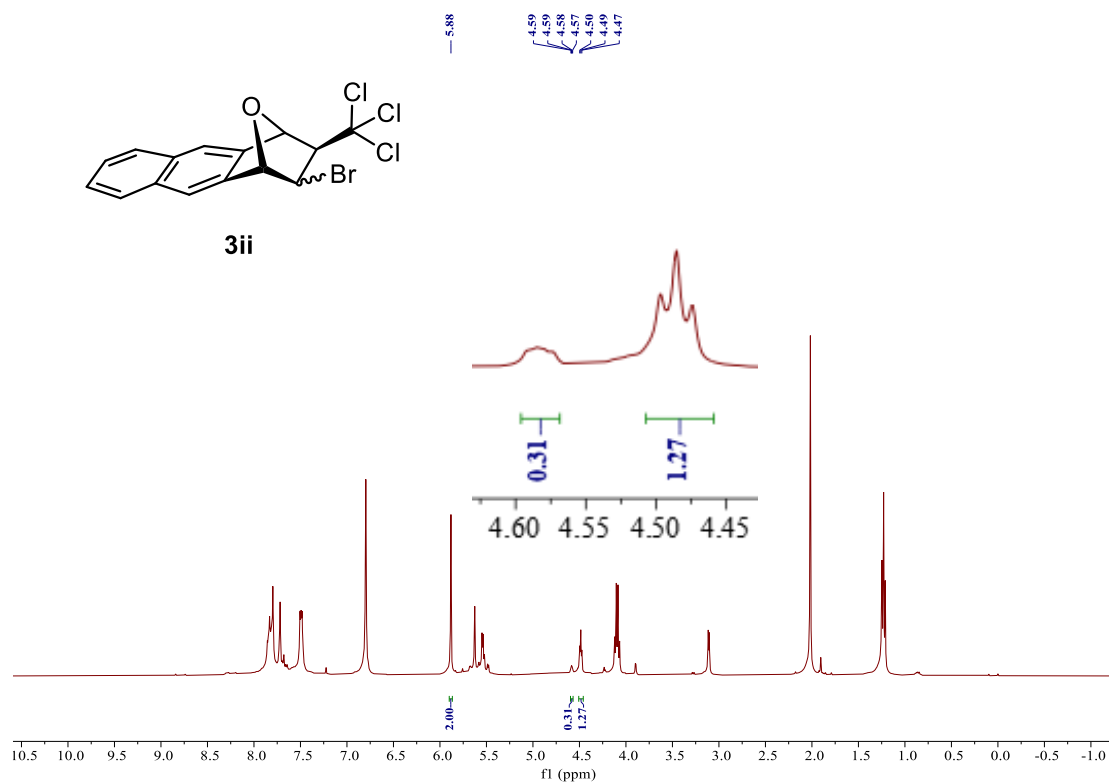

The crude mixture of **3ji** with 0.10 mmol 1,3-Benzodioxole as the internal standard.

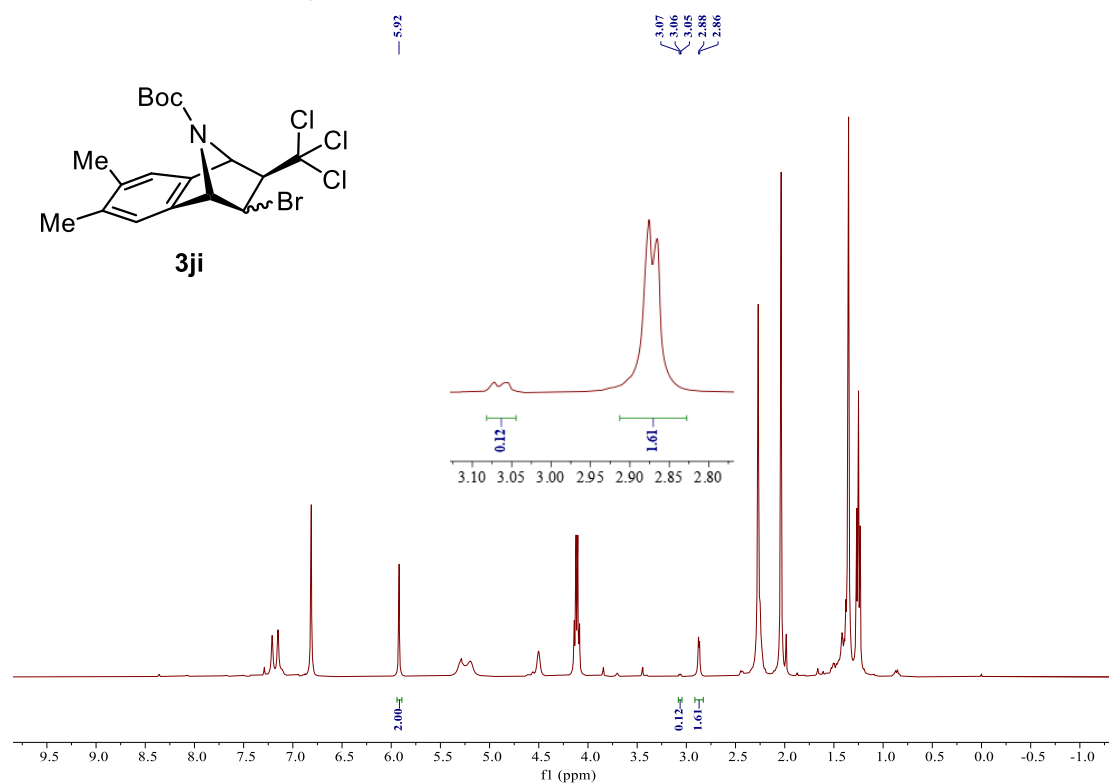

The crude mixture of **3ki** with 0.09 mmol 1,3-Benzodioxole as the internal standard.

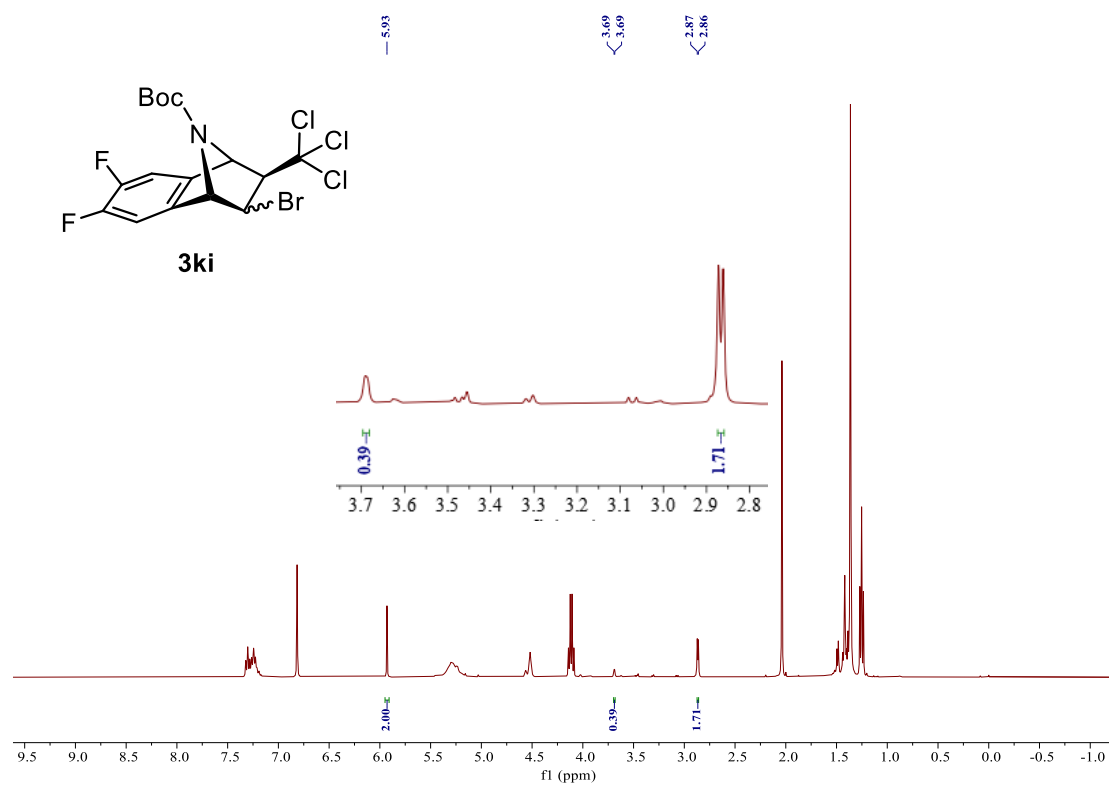

The crude mixture of **3li** with 0.08 mmol 1,3-Benzodioxole as the internal standard.

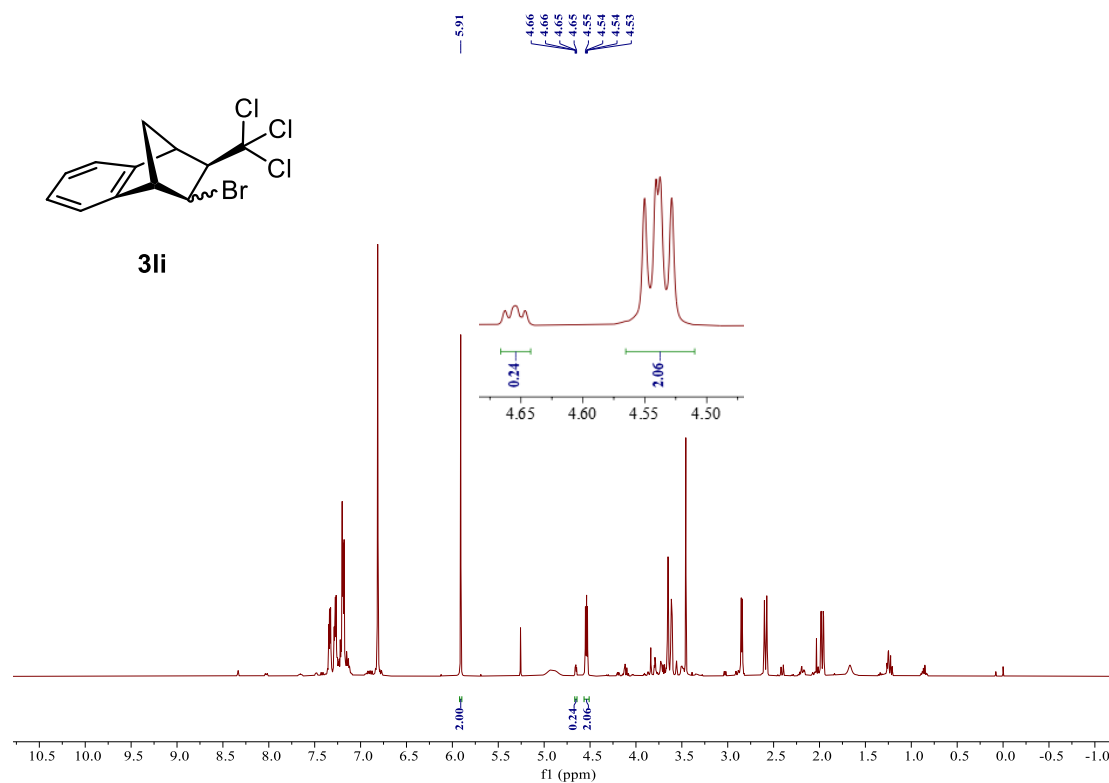

The crude mixture of **5aa** with 0.05 mmol p-nitrotoluene as the internal standard.

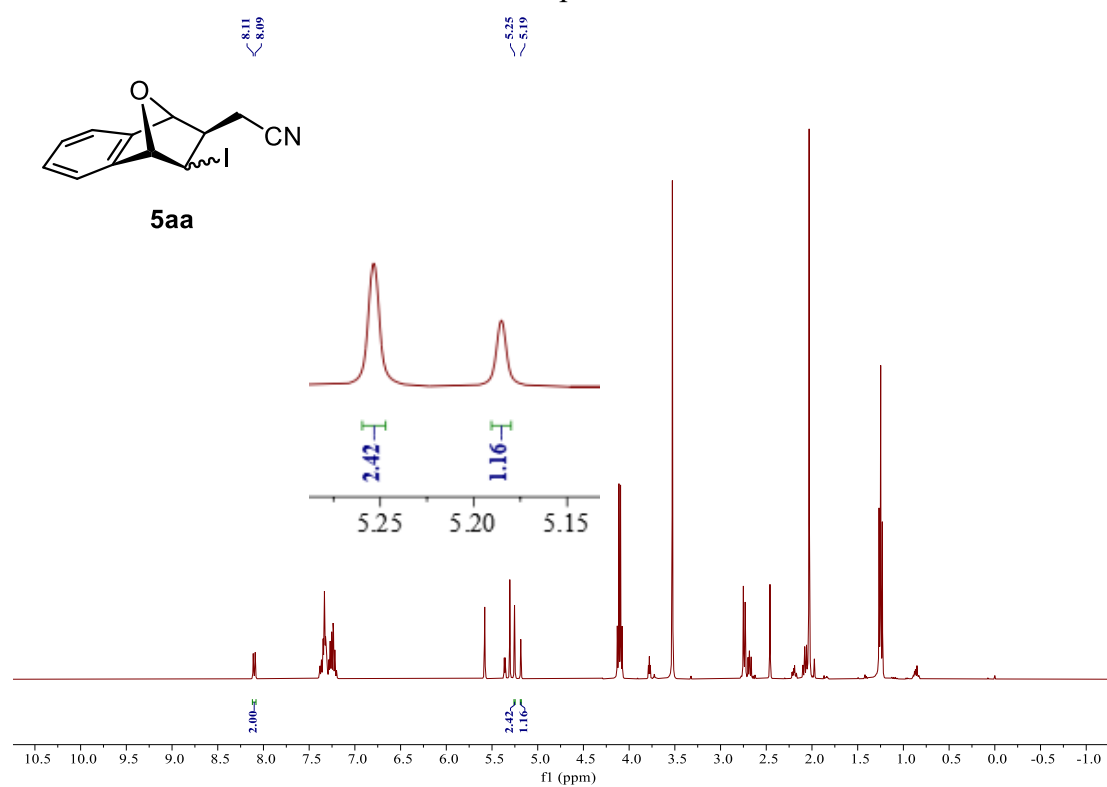

The crude mixture of **5ab** with 0.05 mmol p-nitrotoluene as the internal standard.

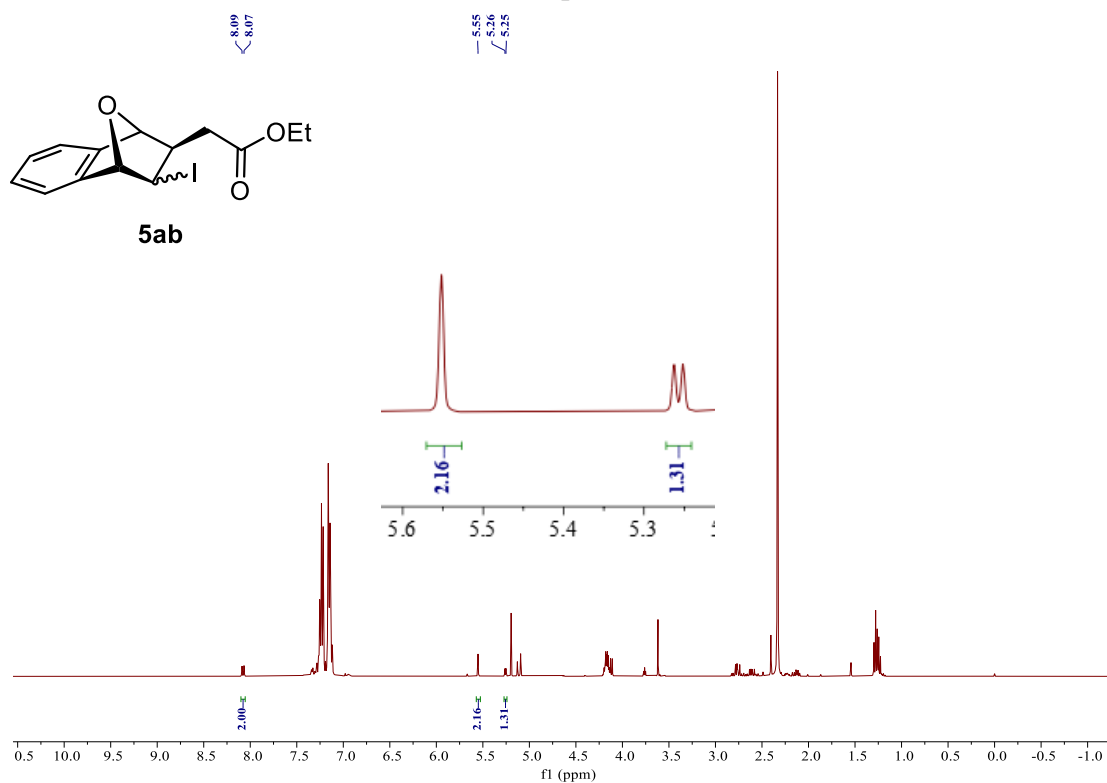

The crude mixture of **5ac** with 0.06 mmol p-nitrotoluene as the internal standard.

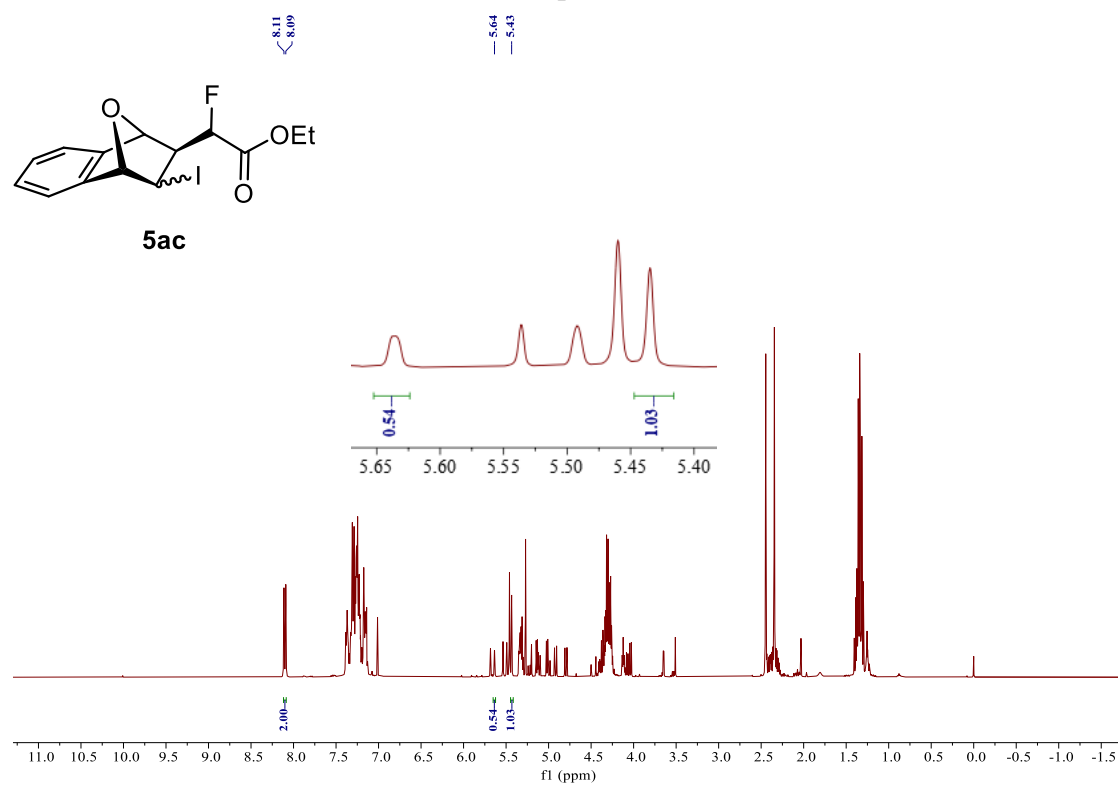

The crude mixture of **5ad** with 0.05 mmol p-nitrotoluene as the internal standard.

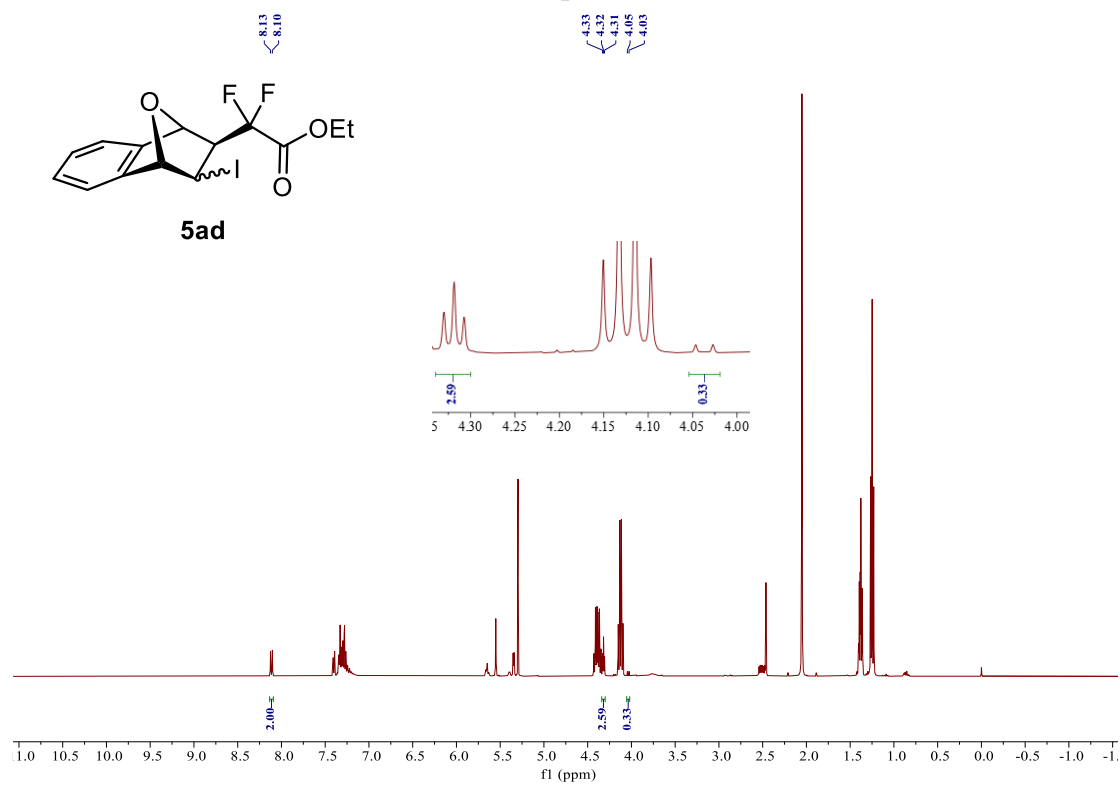



The crude mixture of **5ae** with 0.08 mmol 1,3-Benzodioxole as the internal standard.

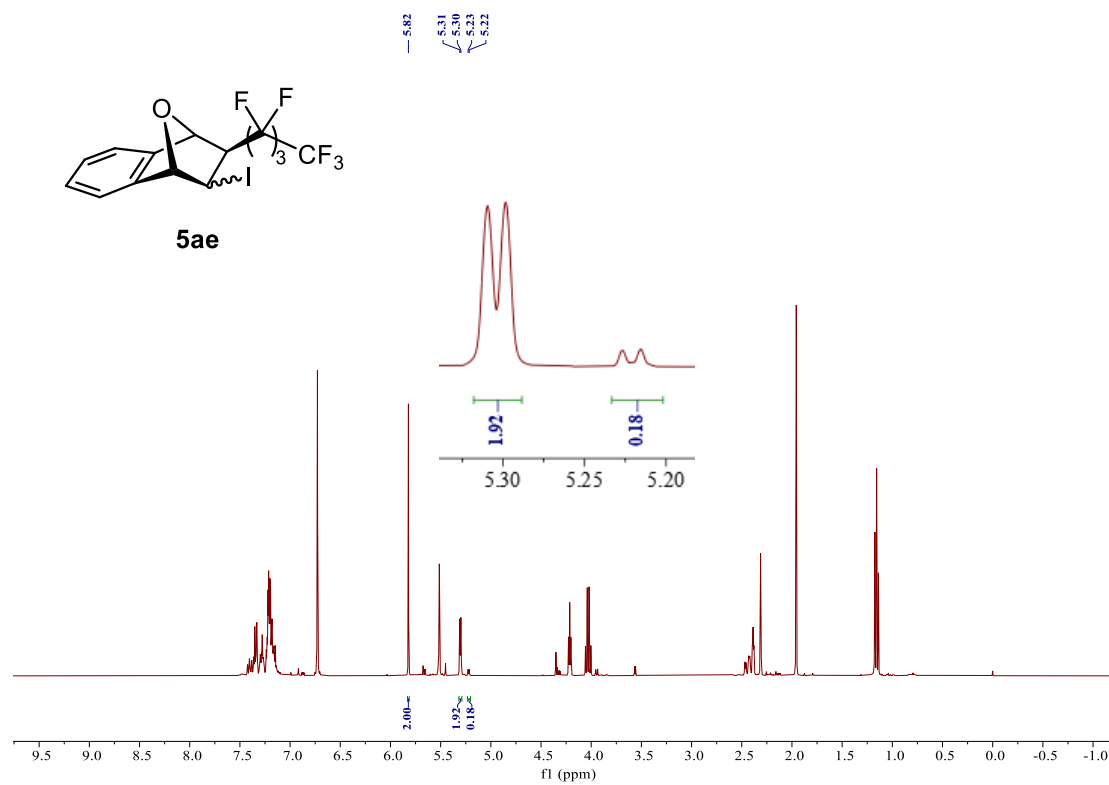

The crude mixture of **5af** with 0.08 mmol 1,3-Benzodioxole as the internal standard.

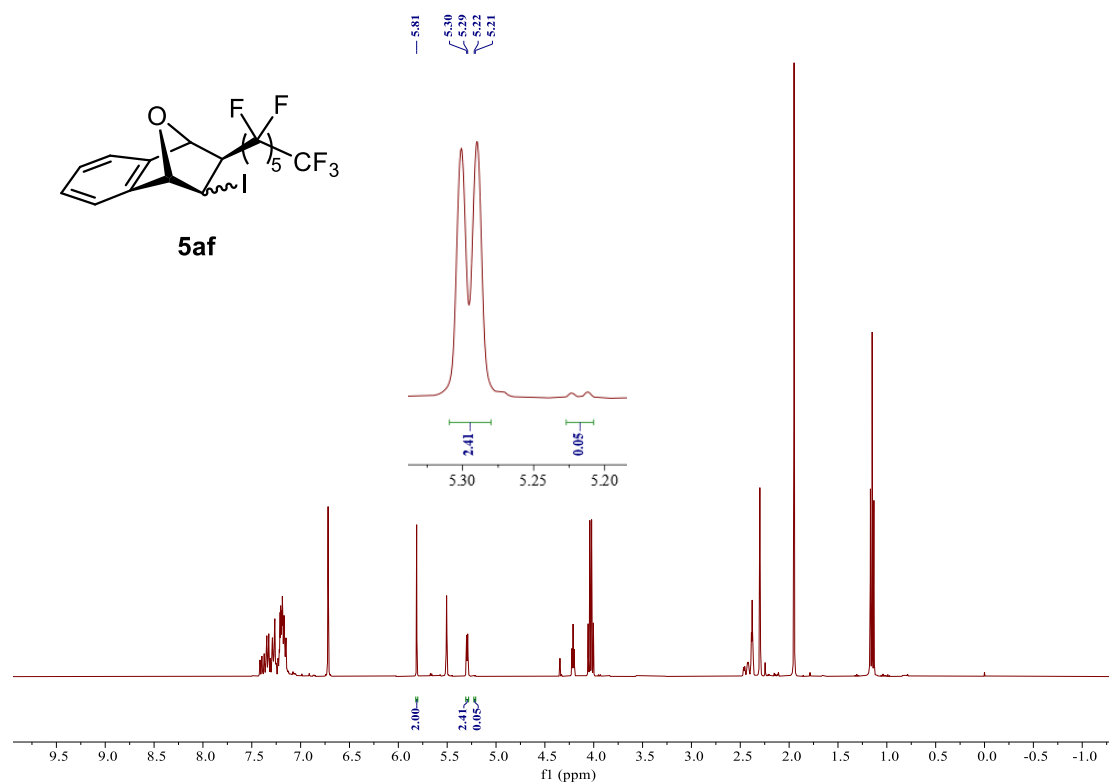

The crude mixture of **5ag** with 0.08 mmol 1,3-Benzodioxole as the internal standard.

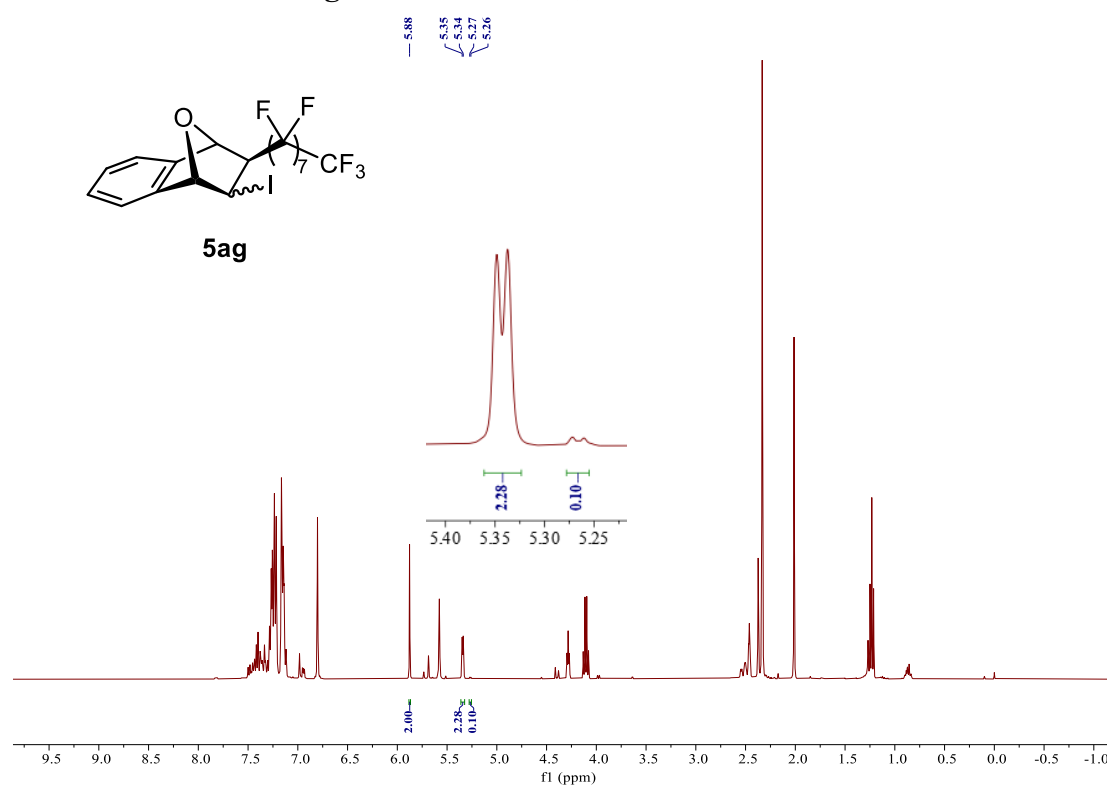

The crude mixture of **5ah** with 0.09 mmol 1,3-Benzodioxole as the internal standard.

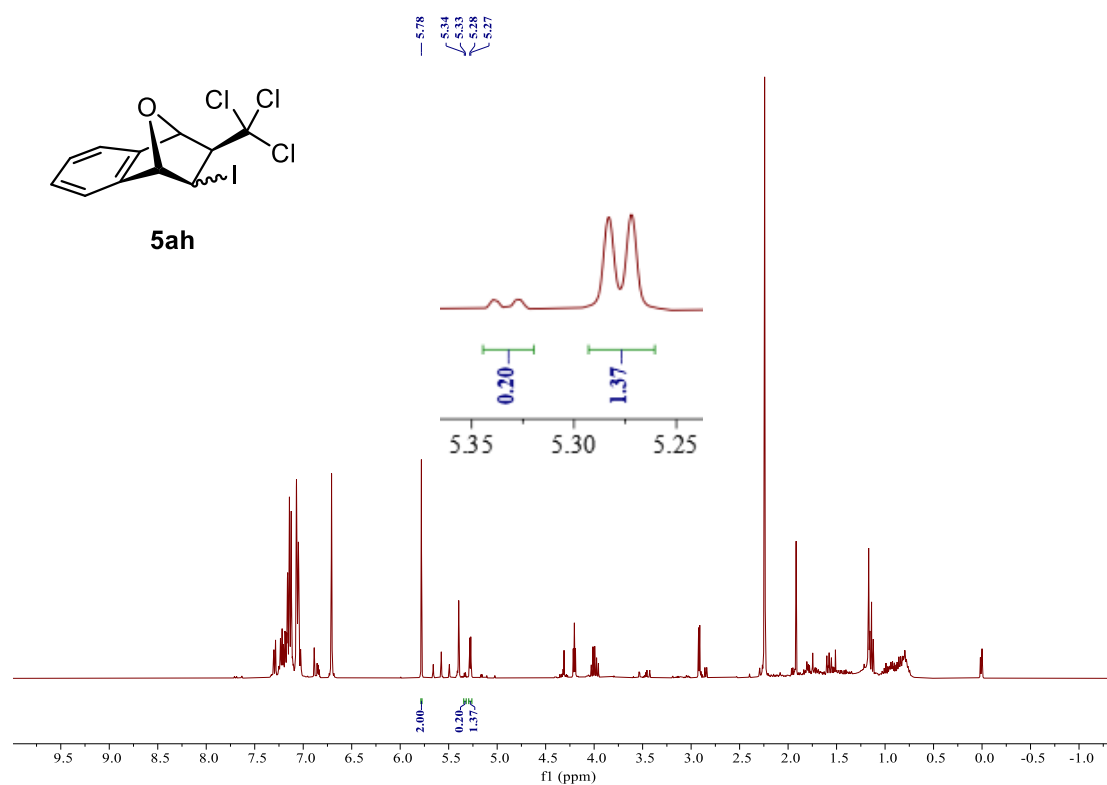

Supplement: d5gc05217c1.pdf [file d5gc05217c1.pdf]
